# Supplementary material for: Effects of Copy Number Variations in the Plectin (PLEC) Gene on the Growth Traits and Meat Quality of Leizhou Black Goats
Source: MDPI journal article supplement (doi:10.3390/ani13233651), 2023-11-25
Supplement: s1 [file s1]

## Model Building Report

This document lists the results for the homology modelling project "PLEC-cds" submitted to SWISS-MODEL workspace on Nov. 16, 2023, 10:47 a.m.. The submitted primary amino acid sequence is given in Table T1.

If you use any results in your research, please cite the relevant publications:

- Waterhouse, A., Bertoni, M., Bienert, S., Studer, G., Tauriello, G., Gumienny, R., Heer, F.T., de Beer, T.A.P., Rempfer, C., Bordoli, L., Lepore, R., Schwede, T. SWISS-MODEL: homology modelling of protein structures and complexes. *Nucleic Acids Res.* 46(W1), W296-W303 (2018). [M](#) [doi>](#)
- Bienert, S., Waterhouse, A., de Beer, T.A.P., Tauriello, G., Studer, G., Bordoli, L., Schwede, T. The SWISS-MODEL Repository - new features and functionality. *Nucleic Acids Res.* 45, D313-D319 (2017). [M](#) [doi>](#)
- Studer, G., Tauriello, G., Bienert, S., Biasini, M., Johner, N., Schwede, T. ProMod3 - A versatile homology modelling toolbox. *PLOS Comp. Biol.* 17(1), e1008667 (2021). [M](#) [doi>](#)
- Studer, G., Rempfer, C., Waterhouse, A.M., Gumienny, G., Haas, J., Schwede, T. QMEANDisCo - distance constraints applied on model quality estimation. *Bioinformatics* 36, 1765-1771 (2020). [M](#) [doi>](#)
- Bertoni, M., Kiefer, F., Biasini, M., Bordoli, L., Schwede, T. Modeling protein quaternary structure of homo- and hetero-oligomers beyond binary interactions by homology. *Scientific Reports* 7 (2017). [M](#) [doi>](#)

## Results

The SWISS-MODEL template library (SMTL version 2023-11-08, PDB release 2023-11-03) was searched with for evolutionary related structures matching the target sequence in Table T1. For details on the template search, see Materials and Methods. Overall 3124 templates were found (Table T2).

## Models

The following models were built (see Materials and Methods "Model Building"):

| Model #01                                                                           | File | Built with    | Oligo-State | Ligands | GMQE |
|-------------------------------------------------------------------------------------|------|---------------|-------------|---------|------|
|  | PDB  | ProMod3 3.3.0 | monomer     | None    | 0.22 |

| Template   | Seq Identity | Oligo-state | QSQE | Found by    | Method       | Resolution | Seq Similarity | Range    | Coverage | Description        |
|------------|--------------|-------------|------|-------------|--------------|------------|----------------|----------|----------|--------------------|
| H9F0F3.1.A | 94.23        | monomer     | -    | AFDB search | AlphaFold v2 | -          | 0.59           | 1 - 1179 | 0.26     | Plectin isoform 1c |

The template contained no ligands.

Target MSGEDQEVRAVVEDGSNGSGSPSPGDTLPWNLEKTRSRGGGGPGNGSVLDPAAERAVIRIADERDRVQKKTFTKWVN  
H9F0F3.1. AMSGEDAEVRAVPEDVSNSSGSPSPGDTLPWNLGKTRSRSGGGAGSNGSVLDPAAERAVIRIADERDRVQKKTFTKWVN

Target KHLIKARHISDLIEDLRDGHNLISLLEVLSGDSLPREKGRMRFHKLQNVQIALDYLRRHQVKLVNIRNDDIADGNPKLT  
H9F0F3.1. AKHLIKARHISDLIEDLRDGHNLISLLEVLSGDSLPREKGRMRFHKLQNVQIALDYLRRHQVKLVNIRNDDIADGNPKLT

Target LGLIWTIILHFQISDIQVSGQSEDMTAKEKLLLSQRMVEGYQGLRCDNFTSSWRDGRLFNAIIHRHKPMLIDMNKVYRQ  
H9F0F3.1. ALGLIWTIILHFQISDIQVSGQSEDMTAKEKLLLSQRMVEGYQGLRCDNFTSSWRDGRLFNAIIHRHKPMLIDMNKVYRQ

Target TNLENLDQAFSVAERDLGVTRLLDPEDVDVPQDEKSIITYVSSLYDAMPVPDQDGVKANELQLRWQEYRELVLVLLQ  
H9F0F3.1. ATNLENLDQAFSVAERDLGVTRLLDPEDVDVPQDEKSIITYVSSLYDAMPVPDQDGVKANELQLRWQEYRELVLVLLQ

Target WIRAHTAAFEERRFPSSFEIEILWCQFLKFKEKELPAKEADKNRSKGIYQSLEGAVQAGQLKVPYHPLDVEKEWGKL  
H9F0F3.1. AWIRHHTAAFEERRFPSSFEIEILWSQFLKFKEKELPAKEADKNRSKGIYQSLEGAVQAGQLKVPYHPLDVEKEWGKL

Target HVAILEREKQLRSEFERLERLRIVSKLQMEAGLCEEQLNQADALLQSDVRLAAGKAPQRAGEVERDLKADGMIRLLF  
H9F0F3.1. AHVAILEREKQLRSEFERLECLQRIVTKLQMEAGLCEEQLNQADTLLQSDVRLAAGKVPQRAGEVERDLKADSMIRLLF

Target NDVQALKDGRHPQGEQMYRRVYRLHERLVAIRTEYNRLR-G-----T----PRHPELEDSTLRYLQDLLAWVE  
H9F0F3.1. ANDVQTLKDRHPQGEQMYRRVYRLHERLVAIRTEYNRLRKAGVAAPATQVTQVTLQSVQRRPELEDSTLRYLQDLLAWVE

Target ENQRRVDSAEWGVLPVSAEQLGSHRGLHQSVEEFRAKIERARTDEGLSPATRGAYRDCLGRDLQYAKLLNSSKARLR  
H9F0F3.1. AENQHRVDGAEWGVLPVSAEQLGSHRGLHQSIEEFRAKIERARSDEGLSPATRGAYRDCLGRDLQYAKLLNSSKARLR

Target SLESLHGFVAAATKELMWLSEKEEEEVGFWDWSEKNSNMAAKKEAYSALMRELELKEKKIKEIQSTGDRLLREDHPARPTV  
H9F0F3. 1. ASLESLHSFVAAATKELMWLNEKEEEEVGFWDSDRNTNMTAKKESYSALMRELELKEKKIKELQSAGDRLLREDHPARPTV

Target ESFQAALQTQWSWMLQLCCCEIAHLKENTAYFQFFSDVREAEQRLKQLQETLHRKYTCDRSITVTRLEDLLQDAQDEKDQ  
H9F0F3. 1. AESFQAALQTQWSWMLQLCCCEIAHLKENAAYFQFFSDVREAEQQLQKLQEALRRKYSCDRSATVTRLEDLLQDAQDEKEQ

Target LNEYRGHLSGLAKRAKAIIVQLTPRNPQTPTGRVPLLAVCDYKQVEATVHKGDECQMLGPAQPFHWKVLSSSGSEAAVPS  
H9F0F3. 1. ALNEYKGHLSGLAKRAKAIIVQLKPRHPAHPVRSRLPLLAVCDYKQVEVTVHKGDECQLVGPAQPSHWKVLSSSGSEAAVPS

Target VCFLVPPPNQEALEAVARLEAQHQALVTLWHQLHTDMKSLLAWQSLSRDVQLIRSWSLVTFRTLKPEEQRQALRSLELHY  
H9F0F3. 1. AVCFLVPPPNQEAQEAQVTRLEAQHQALVTLWHQLHVDMSLLAWQSLRRDVQLIRSWSLATFRTLKPEEQRQALHSLELHY

Target QAFLRDSQDAGGFGPEDRLQAEREYGSCSRHYQQLQSLEQGEQESRCQRCISELKDIRLQLEACETRTRVHRLRPLDK  
H9F0F3. 1. AQAFLRDSQDAGGFGPEDRLMAEREYGSCSHHYQQLQSLEQGAQESRCQRCISELKDIRLQLEACETRTRVHRLRPLDK

Target EPARECAQRIAEQKKAQAEVEGLGKGVARLSAEAEKVLALPEPSPAAPTLRSELELTGKLEQVRSLSAIYLEKLTISL  
H9F0F3. 1. AEPARECAQRIAEQKKAQAEVEGLGKGVARLSAEAEKVLALPEPSPAAPTLRSELELTGKLEQVRSLSAIYLEKLTISL

Target VIRSTQGAEEALRAHEEQLEKAQAVPAALPELEATKAAMKKLRAQAEQPVFDALRDELRGAEVGERLQQRHGERDVE  
H9F0F3. 1. AVIHSTQGAEEVLRRAHEEQLEKAQAVPATLPELEATKASLKKLRSQAEQPVFDALRDELRGAEVGERLQQRHG-----

Target VERWREVRTQLLERWQAVLAQTDVVRQRELEQLGRQLRYRESADPLGAWLQDARRRQEIQAVPLADSQAVREQLRQEKA  
H9F0F3. 1. A-----

Target LLEEIERHAEKVEECQRFQAKQYINAIKDYELQLVITYKAQLEPVASPAKKPKVQSGSESVIQEYVDLRTRYSELSTLTSQY  
H9F0F3. 1. A-----

Target IRFISETLRRMEEEERLAEQQRAEERERLAEVEAALEKQRQLAEAHAQAKAQAEREAQELQRRMQEEVARREEVAVDAQQ  
H9F0F3. 1. A-----

Target QKRSIQEELQQLRQSSEAEIQAKARQVEAAERSRLRIEEEIRVVRLQLETTERQRGGAEGELQALRARAEAEQKRQAQ  
H9F0F3. 1. A-----

Target EEAERLRRQVQEETQQRKQAEAEGLRVKAEAEAREKQRALQALEELRLQAEAEERRLRQAEAEERARQVQVALETAQRS  
H9F0F3. 1. A-----

Target AQAELQSKHASFAEKTAQLERTLEEEHVTVVQLREEATRREQQQAEARAREEAERELERWQLKANEALRLRLQAEVEAQ  
H9F0F3. 1. A-----

Target QKSLAQAEAEKQKEAAEREARRRGKAEQAVVRQRELAEQELERQRLAEGTAQQRLAAEQELIRLRAETEQGEQQRQLLE  
H9F0F3. 1. A-----

Target EELARLQSEAAAATQKRQLEAEALAKVRAEMEVLLASKARAEESRSSEKSKQRLAEAGRFRELAEEAARLRALAEAA  
H9F0F3. 1. A-----

Target KRQRQLAEEDAARQRAEAERVLSEKLAATSEATRLKTEAEIALKEKEAENERLRLRAEDEAFQRRRLEEQAQHKADIEE  
H9F0F3. 1. A-----

Target RLAQLRKASESELERQKGLVEDTLRQRQVVEEILALKASFEKAAAGKAELELELGRIRGNAEDTLRSKEQAEQEAARQR  
H9F0F3. 1. A-----

Target QLAAEEERRRRREAEERVQKSLAAEEEAARQRKAALVEEERLAKAVEEARRLRERAEHESVRQLQLAQEAAQKRLQAEKA  
H9F0F3. 1. A-----

Target HAFVQKQEQELQQLTQQEQSVLEKLRSEAEAAARRAAEEAEERARAEREAQAQSRQVVEAERLKQAAEEQAQAQAQA  
H9F0F3. 1. A-----

Target AAELRKEAEQEAARRAQEAALRQKQAADAEMEKHKKFAEQTLRQKAQVEQELTALRLKLEETDHQKSILDQELQRLK  
H9F0F3. 1. A-----

Target AEVTEAARQRSQVEEELFSVRVQMEELGKLKARIEAENRALILRDKDNTQRLQEEAEKMKQVAEEAARLSVAAQEAARL  
H9F0F3. 1. A-----

Target RQLAEEDLAQQRALAEKMLKEKMQAVQEATRLKAEALLQQQKELAQEQARRLQEDKEQMAQQLAQETQGFQRTLETERQ  
H9F0F3. 1. A-----

Target RQLEMSAEERLRLRVAEMSRAQARAEEDAQFRKQAEIIGAKLHRTTELATQEKVTLVQTLETQRRQSDRDADRLREAIA  
H9F0F3. 1. A-----

Target ELEREKDKLKEAELLQLKSEEMQTVQQEQQLLQETQALQQSFLSEKDSLLQRERFIEEEKAKLERLFQDEVAKAQKLREE  
H9F0F3. 1. A-----

Target QQRQQQQMQQEQQLLASMEEARRRQHEAEEGVRRKQEEQLLLEQQRRQQEQQLAEENRRLRERLEHLEEEHRAALAHSE

H9F0F3. 1. A-----  
Target EITAAQAAATRALPNGQDAADGPAAEPEHAFEGLRQKVPAQQLQEAGILSTEELQRLAQGHTTVAELTQREDVRRYLQGH  
H9F0F3. 1. A-----  
Target SSIAGLLLKPANEKLTIIYAALRRQLLSPGTALILLEAQAASGFLDPVRNRRLTVTEAVKEGVVGPELHHKLLSAERAVT  
H9F0F3. 1. A-----  
Target GYKDPYTGEKISLQFQAMKKDLIVREHGIRLLEAQIATGGVIDPVHSHRVPVDVAYHRGYFDEEMNRVLQDP SDDTKGFFD  
H9F0F3. 1. A-----  
Target PNTHENLTYLQLLERCVEDPETGLRLLPLTDQAAKGGLVYTDSEARDVFEKATVSAPFGKFQGKTVTIWE LINSEYFTA  
H9F0F3. 1. A-----  
Target EQRRDLLRQFRTGKVTVEKIIKIVITVIEEHEQKGQLCFQGLRALVPAELLESGIIDWDLFRQLQLGERSVQEVAEVEG  
H9F0F3. 1. A-----  
Target VRRALRGSGVIAGVWLEEARQKLSIYEALKKELLQPEAAVALLEAQAGTGHVIDPATSARLTVDEAVRAGLVGPHEKL  
H9F0F3. 1. A-----  
Target LSAEKAVTGYKDPYSGQSVSLFQALKKGLIPREQGLRLDQALSTGGTVDPKSHRLLPLDVACARGYLDEETSTALSAPR  
H9F0F3. 1. A-----  
Target DDAKTYYPRTWELATYSQLQQCRPDPLTGLSLLPLSEEAAARARQQELYSEVQAREAFQKATVEVPVGSFQGRAVTIWE  
H9F0F3. 1. A-----  
Target LINSEYFTAEQRQELLRQFRTGKVTVEKIIKIVITIVEEVETTRRERLSFSGLRAPVPASELLAAGILSSSQFEQLKD GK  
H9F0F3. 1. A-----  
Target TSVKDLSELSSLQTLQSGCLAGIYLESKEKVTIYEAMRGLLRPSTAILLLEAQAATGFLVDPVRNQRLYVHEAVKA  
H9F0F3. 1. A-----  
Target GVVGPHEKLLSAEKAVTGYKDPYSGTISLQFQAMKKGLVREHGIRLLEAQIATGGIIDPVHSHRVPVDVACRQGYFD  
H9F0F3. 1. A-----  
Target EEMNRVLEDPSDDTKGFFDPNTHENLTYRQLLERCVEDPETGLRLLPLKGPEKAEVVETTRVYTEEETRRAFEETQIDIP  
H9F0F3. 1. A-----  
Target GGGSHGGSTMSLWEVMQSDLIPEEQRAQLMADFQAGRVTKERMIIIIIEIEIEKTEIVRQQNLASYDYVRRRLTAEDLYEA  
H9F0F3. 1. A-----  
Target RVISRESYSLLREGTRSLREVLEAESAWRYLYGTGCVAGVYLPGSRQTLPIYQALKKGLLSAEVARLLLEAQAATGFLLD  
H9F0F3. 1. A-----  
Target PVKGERLTVDEAVRKGLVGPHEHRLLSAERAVTGYRDPYTEQTISLQFQAMKKDLIPAEALRLDQALATGGIVDPRLG  
H9F0F3. 1. A-----  
Target FHLPLEVAYQRYLNKDTHTDQLSEPSEVRSYVDPSTDERLSYTLQLRRCRRDETSGFLPLSEARKLTFRGLRKQITVE  
H9F0F3. 1. A-----  
Target ELVRSHVMDEATAQRLQEGLTSIEEVSKNLQKFLEGTSSIAGVLVDATKERLSVYQAMKKGIIRPGTAFELLEAQAATGY  
H9F0F3. 1. A-----  
Target VIDPIKGLKLTVEEAVRMGIVGPEFKLLSAERAVTGYKDPYSGKLISLQFQAMKKGLILKDHGIRLLEAQIATGGIIDP  
H9F0F3. 1. A-----  
Target EESHRLPVDVAYQRGLFDEEMNEILTDPSDDTKGFFDPNTEENLTYLQLMERCVTDPQTGLRLLPLKEKKRERKTSKSS  
H9F0F3. 1. A-----  
Target VRKRRVVIDPETGKEMSVYEAYRKGLIDHQTYLELSECEWEEITISSSDGVVKSMIIDRRSGRQYDIDEAIAKSLID  
H9F0F3. 1. A-----  
Target RSALDQYRAGTLSITEFADMLSGNAGGFRSRSSSVGSSSSYPISPAVSRTQLASWSDPTEETGPVAGILDTETLEKVSIT  
H9F0F3. 1. A-----  
Target EAMHRNLVDNITGQRLLEAQAQCTGGIIDPNTGERFPVTDVANKGLVDKIMVDRINLAQKAFCGFEDPRTKTKMSAAQALK  
H9F0F3. 1. A-----  
Target KGWLYYEAGQRFLVQYLTGGLIEPDTGRVPLDEALQRGTVDARTAQKL RDVSAYS KYLTCPKTKLISYKDALDRSMV  
H9F0F3. 1. A-----  
Target EEGTGLRLLEAAAQSSKGYSPYSVSGSGSTTGSRSGSRTGSRAGSRRGSFDATGSGFSMTFSSSSYSSSGYGRRYASGP  
H9F0F3. 1. A-----

Target TSSLGGPESAAA  
H9F0F3. 1. A-----

| Model #06                                                                         | File | Built with    | Oligo-State                   | Ligands | GMQE | QMEANDisCo Global |
|-----------------------------------------------------------------------------------|------|---------------|-------------------------------|---------|------|-------------------|
|  | PDB  | ProMod3 3.3.0 | monomer (matching prediction) | None    | 0.00 | 0.48 ± 0.05       |

| Template | Seq Identity | Oligo-state | QSQE | Found by | Method | Resolution | Seq Similarity | Range     | Coverage | Description |
|----------|--------------|-------------|------|----------|--------|------------|----------------|-----------|----------|-------------|
| 1sjj.1.A | 12.54        | homo-dimer  | 0.00 | HHblits  | 2DX    | -          | 0.27           | 187 - 806 | 0.13     | actinin     |

The template contained no ligands.

Target MSGEDQEVRAVEDGSNGGSGSPSPGDTLPWNLEKTQSRRRGGGGPGNGSVLDPAAERAVIRIADERDRVQKKTFTKWVN  
1sjj. 1. A -----

Target KHLIKAQRHISDLYEDLRDGHNLISLLEVLSGDSLPREKGRMRFHKLQNVQIALDYLHRHQVKLVNIRNDDIADGNPKLT  
1sjj. 1. A -----

Target LGLIWTIILHFQISDIQVSGQSEDMTAKEKLLWSQRMVEGYQGLRCDNFTSSWRDGRLFNAIIHRHKPMLIDMN--KVY  
1sjj. 1. A -----QRKTFTAWCNSHLRKA-GTQIENIEEDFRDGLKMLLLEVISGERLAKPERGKM

Target RQTNLENLDQAFSVAERDLGVT-RLDPEDVDVPQPEKSIITYVSSLYDAMPRVPDVQDGVKANELQLRWQEYRELVLL  
1sjj. 1. A RVHKISNVNKALDFIA-SKGVKLVSIGAEIIVDGNV--KMTLGMiWTIILRFAIQDISVE-----ETSAKEG

Target LLQWIRAHTAAFE---ERRFPSSFEEIEILWCQFLKFKETELP---AKEADKNRSKGIYQSLEGAVQAGQLKVPPGY--  
1sjj. 1. A LLLWYQRKTAPYKNVNIQNFHISWKDGLGFCALIHRHRPELIDYGKLRKDDPLTNLNTAFDVAEKYLDIPKMLDAEDIVG

Target -----HPLDVEKEWGLHVAILEREKQLRSEFERLERLQRIVSKLQMEAGLCEEQLNQADALLQSDVRL--LA  
1sjj. 1. A TARPDEKAIMTYVSSFYHAFSGAQKAETAA-NRICKVLAVNQENEQLMEDYEKLASDLLEWIRRTIPWLENRAPENTMQA

Target AGKAPQRAGEVERDLKADG---MIRLLFNDV-QALKD-GRHPQGEQMYRRVYRLHERLVAIRT---EYNLRLRGTPRH  
1sjj. 1. A MQQKLEDFRDYRRLHKPPKVQEKQCLEINFNTLQTKLRLSNRPAFMPSEGMVSDINNAWGGLEAQEKGYEEWLLNEIRR

Target P---ELEDSTLRYLQDLLAWVEENQRRVDSAEWGV-DLPSVEAQLGSHRGLHQSVVEEFRAKIERARTDEGQLS---PAT  
1sjj. 1. A LERLDHLAEKFRKQASIHESWTDGKEAMLQKDYETATLSEIKALLKKHEAFESDLAAHQDRVEQIAAIAQELNELDYYD

Target RGAYRDCLGRDLQYAKLLNSSKARLSLES-----LHGFVAAATKELMWLSEKEEEEVGFDSERNNSNMAAKK  
1sjj. 1. A SPSVNARCQKICDQWDNLGALTQKRREALERTEKLETTIDQLYLEYAKRAAPFNWMEGAMEDLQDTFIVHTIEEIQGLT

Target EAYSALMRELELKEKKIKEI---QSTGDRLLREDH---PARPTVESFQAALQTQWSWMLQLCCCIEAHLKENTAY----  
1sjj. 1. A TAHEQFKATLPDADKERQAILGIHNEVSKIVQTYHVNMAGTNPYTTITPQEINGKWEHVRQLVPRRDQALMEEHARQQQN

Target ---FQFFSDVREAEELRKLQETLHRKYTCDRSITVTRLEDLLQDAQDEKQDQLENEYRGHLSGLAKRAKAIQVLTTPRNP  
1sjj. 1. A ERLRKQFGAQNIVIGPWIQTKMEEIGRISI---EMHGTLEDQLNHLRQYEKSIVNYKPKIDQLEGDHQIQIEAL-----

Target QPTRGRVPLLAVCDYKQVEATVHKGDECQMLGPAQPFHWKVLSSSGSEAAVPSVCFLVPPPNQEALAEAVARLEAQHQALV  
1sjj. 1. A -----

Target TLWHQLHTDMKSLLAWSLSRDVQLIRSWSLVTFRTLKPEEQRQALRSLELHYQAFLRDSQDAGGFGPEDRLQAEREYGS  
1sjj. 1. A -----

Target CSRHYQQLLSLEQGEQEESRCQRCISELKDIRLQLEACETRIVHRLRLPLDKEPARECAQRIAEQKKAQAEVEGLGKGV  
1sjj. 1. A -----

Target ARLSAEAEKVLALPEPSPAAPTLRSELELTGKLEQVRSLSAIYLEKLKTIISLVIRSTQGAEALRAHEEQKAEQAVPA  
1sjj. 1. A -----

Target ALPELEATKAAMKKLRAQAEAAQPVFDALRDELGAQEVGERLQQRHGERDVEVERWRERVTLLEWQAVLAQTDVVRQR  
1sjj. 1. A -----

Target ELEQLGRQLRYYRESADPLGAWLQDARRRQEQIQAVPLADSQAVREQLRQEKALLEEIERHAEKVVEECQRFQKQYINAIK  
1sjj. 1. A -----

|                      |                                                                                              |
|----------------------|----------------------------------------------------------------------------------------------|
| Target<br>1sjj. 1. A | DYELQLVTYKAQLEPVASPAKKPKVQSGSESVIQEYVDLRTRYSELSTLTSQYIRF ISETLRRMEEEEERLAEQQRAEERE<br>-----  |
| Target<br>1sjj. 1. A | RLAEVEAALEKQRQLAEAHAQAKAQAEREAQELQRRMQEEVARREEVAVDAQQKRSIQEELQQLRQSSEAEIQAKARQV<br>-----     |
| Target<br>1sjj. 1. A | EAAERSRLRIEEEIRVVRLQLETTERQRGGAEGELQALRARAEAEQKRQAQEEAERLRRQVQEETQQRKQAEAEGLR<br>-----       |
| Target<br>1sjj. 1. A | VKAEAEAAAREKQRALQALEELRLQAEAEERRLRQAEAEERARQVQVALETAQRSQAELQSKHASFAEKTAQLERTLEEEH<br>-----   |
| Target<br>1sjj. 1. A | VTVVQLREEATRREQQQAEARAREEAERELERWQLKANEALRLRLQAE EVAQKSLAQAEAEKQKEAAEREARRRGKAE<br>-----     |
| Target<br>1sjj. 1. A | EQAVRQRELAEQEELERQRQLAEGTAQQRLAAEQELIRLRAETEQQGEQQRQLLEEELARLQSEAAAATQKRQELEAE LAKV<br>----- |
| Target<br>1sjj. 1. A | RAEMEVLLASKARAEESRSSSEKSKRLEAEAGRFRELAEAAARLRALAEAKRQRQLAEEDAARQRAEAERVLSEKLA<br>-----       |
| Target<br>1sjj. 1. A | AISEATRLKTEAEIALKEKEAENERLRRLAEDEAFQRRRLEEQAQHKADIEERLAQLRKASESELERQKGLVEDTLRQR<br>-----     |
| Target<br>1sjj. 1. A | RQVEEEILALKASFEKAAAGKAELELELGRIRGNAEDTLRSKEQAEQEAARQRQLAAEEERRRREAEERVQKSLAAEEEA<br>-----    |
| Target<br>1sjj. 1. A | ARQRKAALEEVERLKAKVEEARRLRERAEHESVRQLQLAQEAAQKRLQAEKKAHAFVQQKEQELQQT LQQEQSVLEKLR<br>-----    |
| Target<br>1sjj. 1. A | SEAEAAARRAAEEAEERARAEREAQSRQRVEEAERLKQAAEEQAQAQAQAAAEKLRKEAEQEAARRAQAEQAALRQK<br>-----       |
| Target<br>1sjj. 1. A | QAADAEMEKHKKFAEQTLRQKAQVEQELTALRLKLEETDHQKSLDQELQRLKAEVTEAARQRSQVEEELFSVRVQMEEL<br>-----     |
| Target<br>1sjj. 1. A | GKLKARIEAENRALILRDKDNTQRLLQEEAEKMKQVAEEAARLSVAAQEAARLRQLAEEDLAQQRALAEKMLKEKMQAVQ<br>-----    |
| Target<br>1sjj. 1. A | EATRLKAEAE LLQQKELAQEQARRLQEDKEQMAQQLAQETQG FQRTLETERQRQLEMSAEAEERLRLRVAEMSRAQARAE<br>-----  |
| Target<br>1sjj. 1. A | EDAQRFRKQAE EIGAKLHRTELATQEKVTLVQTLETQRQQSDRDADRLREAI AELEREKDKLKKEAELLQLKSEEMQTVQ<br>-----  |
| Target<br>1sjj. 1. A | QEQLLQETQALQQSFLSEKDSLLQRERFIEEEKAKLERLFQDEVAKAQKLREEQQRQQQQMQQE KQQLLASMEEARRRQH<br>-----   |
| Target<br>1sjj. 1. A | EAEEGVRRKQEELQLLEQQRQQQEQLLAENRRRLRERLEHLEEEHRAALAHSEEITAAQAAATRALPNGQDAADGPAAEP<br>-----    |
| Target<br>1sjj. 1. A | EHAFEGLRQKVPAQQLQEAGILSTEELQRLAQGHTTVAELTQREDVRRYLQGHSSIAGLLLKPANEKLT IYAALRRQLLS<br>-----   |
| Target<br>1sjj. 1. A | PGTALILLEAQAA SGFLDPVRNRRLTVTEAVKEGVVGPELHHKLLSAERAVTGKDPYTG EKISL FQAMKKDLIVREHG<br>-----   |
| Target<br>1sjj. 1. A | IRLLEAQIATGGVIDPVHSHRPVDVAYHRGYFDEEMNRVLQDPSDDTKGFFDPNTHENLTYLQLLERCVEDPETGLRLL<br>-----     |
| Target<br>1sjj. 1. A | PLTDQAAKG GELVYTDSEARDVFEKATVSAPFGKFQKGTVTI WELINSEYFTAEQRRDLLRQFRTGKVTVEKIIKIVITV<br>-----  |
| Target<br>1sjj. 1. A | IEEHEQKGQLCFQGLRALVPAAELLES G I IDWDLFRQLQLGERSVQEVAEVEGVRRALRGSGVIAGVWLEEARQKLSIYE<br>----- |
| Target<br>1sjj. 1. A | ALKKELLQPEAAVALLEAQAGTGHVIDPATSARLTVDEAVRAGLVGP ELHEKLLSAEKAVTGKDPYSGQSVSLFQALKK<br>-----    |
| Target<br>1sjj. 1. A | GLIPREQGLRLLDAQLSTGGTVDPSPKSHRLPLDVACARGYLDEETSTALSAPRDDAKTY YDPRTWELATYSQLQQQCRPD<br>-----  |
| Target<br>1sjj. 1. A | PLTGLSLLPLSEEAARARQQELYSEVQAREAFQKATVEVPVGSFQGRAVTIWELINSEYFTAEQRQELLRQFRTGKVTVE<br>-----    |

Target  
1sjj. 1. A-----  
KIIKIVITIVEEVETTRRERLSFSGLRAPVPASELLAAGILSSSQFEQLKGKTSVKDLSELSSLQTLQGGSGCLAGIYL

Target  
1sjj. 1. A-----  
EESKEKVTIYEAMRRGLLRPSTAILLLEAQAATGFLVDPVRNQRLYVHEAVKAGVVGPHEKLLSAEKAVTGYKDPYSG

Target  
1sjj. 1. A-----  
STISLFQAMKKGLVREHGIRLLEAQIATGGIIDPVHSHRVPVDVACQRGYFDEEMNRVLEDPSDDTKGFFDPNTHENLT

Target  
1sjj. 1. A-----  
YRQLLERCVEDPETGLRLLPLKGPEKAEVVETTRVYTEEETTRAFEETQIDIPGGGSHGGSTMSLWEVMQSDLIPEEQRA

Target  
1sjj. 1. A-----  
QLMADFQAGRVTKERMIIIIIEIIEKTEIVRQQNLASYDYVRRRLTAEDLYEARVISRESYSLLREGTRSLREVLEAESA

Target  
1sjj. 1. A-----  
WRYLYGTGCVAGVYLPGSRQTLPIYQALKKGLLSAEVARLLLEAQAATGFLDPVKGERLTVDEAVRKGLVGPELHDRLL

Target  
1sjj. 1. A-----  
SAERAVTGYRDPYTEQTISLFQAMKKDLIPAEALRLDDAQLATGGIVDPRLGFHLPLEVAYQRGYLNKDTHTDQLEPSE

Target  
1sjj. 1. A-----  
VRSYVDPSTDERLSYTLQLRRCCRDETSGFLPLPSEARKLTFRGLRKQITVEELVRSHVMDEATAQRLQEGLTSIEEVS

Target  
1sjj. 1. A-----  
KNLQKFLEGTSSIAGVLVDATKERLSVYQAMKKGIIRPGTAFELLEAQAATGYVIDPIKGLKLTVEEAVRMGIVGPEFKD

Target  
1sjj. 1. A-----  
KLLSAERAVTGYKDPYSGKLISLFQAMKKGLIKDHGIRLLEAQIATGGIIDPEESHRLPVDVAYQRGLFDEEMNEILTD

Target  
1sjj. 1. A-----  
PSDDTKGFFDPNTEENLTYLQLMERCVTDPQTGLRLLPLKEKKRERKTSKSSVRKRRVVIVDPETGKEMSVYEAYRKGL

Target  
1sjj. 1. A-----  
IDHQTYLELSEQECEWEEITISSDGVVKSMIIDRRSGRQYDIDEAIAKSLIDRSALDQYRAGTLSITEFADMLSGNAGG

Target  
1sjj. 1. A-----  
FRSRSSSVGSSSSYPISPAVSRTQLASWSDPTEETGPVAGILDTELEKVSITEAMHRNLVDNITGQRLLEAQAQCTGGII

Target  
1sjj. 1. A-----  
DPNTGERFPVTDVANKGLVDKIMVDRINLAQKAFCGFEDPRTKTKMSAAQALKKGWLYEAGQRFLEVQYLTGGLIEPDT

Target  
1sjj. 1. A-----  
PGRVPLDEALQRGTVDARTAQKL RDVSAYS KYLTCPKTKLKISYKDALDRSMVEEGTGLRLLLEAAQSSKGYSPYSVSG

Target  
1sjj. 1. A-----  
SGSTTGSRSRGTGSRAGSRRGSF DATGSGFSMTFSSSSYSSSGYGRRYASGPTSSLGGPESAAA

| Model #15                                                                           | File | Built with    | Oligo-State                   | Ligands | GMQE | QMEANDisCo Global |
|-------------------------------------------------------------------------------------|------|---------------|-------------------------------|---------|------|-------------------|
|  | PDB  | ProMod3 3.3.0 | monomer (matching prediction) | None    | 0.00 | 0.55 ± 0.05       |

| Template | Seq Identity | Oligo-state | QSQE | Found by | Method | Resolution | Seq Similarity | Range     | Coverage | Description     |
|----------|--------------|-------------|------|----------|--------|------------|----------------|-----------|----------|-----------------|
| 1hci.1.A | 14.35        | homo-dimer  | 0.00 | HHblits  | X-ray  | 2.80Å      | 0.28           | 302 - 734 | 0.09     | ALPHA-ACTININ 2 |

The template contained no ligands.

Target  
1hci. 1. A-----  
MSGEDQEVRAVVEDGSNGSGSPSPGDTLPWNLEKTQRSRRGGGGPGNGSVLDP AERAVIRIADERDRVQKKTFTKWVN

Target  
1hci. 1. A-----  
KHLIKAQRHISDLYEDLRDGHNLISLLEVLSGDSLPREKGRMRFHKLQNVQIALDYL RHRQVKLVNIRNDDIADGNPKLT

Target  
lhci. 1. A LGLIWTIILHFQISDIQVSGQSEDMTAKEKLLLSQRMVEGYQGLRCDNFTSSWRDGRLFNAI IHRHKPMLIDMNKVYRQ-----

Target  
lhci. 1. A TNLENLDQAFSVAERDLGVTRLDPEDVDVPQPDEKSIITYVSSLYDAMPRPVDVQDGVKANELQLRWQEYRELVLVLLQ-----QENERLMEEYERLASELLE

Target  
lhci. 1. A WIRAHTAAFEERRFPSSFEEIEILWCQFLKFKETELPAKEADKNRSKGIYQSLEGAVQAG---QLKVPPGYHPLDVEKEW  
WIRRTIPWLENRTPEKTMQAMQKLEDFRDYRRKHKPPKVQEKCLEINFNTLQTKLRISNRPAFMPSEGKMVSDIAGAW

Target  
lhci. 1. A GKLHVAILEREKQLRSEFERLERLQRIVSKLQMEAGLCEEQLNQADALLQSDV----RLLAAGKAPQRAGEVERDLKAD  
QRLEQAEKGVEEWWLLNEIRRLERLEHLAEKFRQKASTHETWAYGKEQILLQKDYESASLTEVRALLRKHEAFESDLAAHQ

Target  
lhci. 1. A GMIRLLFNDVQALKDGRHPQGEQMYRRVYRLHERLVAIRTEYNL---RLRGTPRHP-E---LEDSTLRYLQDLLAWVEEN  
DRVEQIAAIAQELNELDYHDAVNVDRCQKICDQWDRGLTQKRREALERMEKLETTIDQLHLEFAKRAAPFNWMEGA

Target  
lhci. 1. A QRRVDSAEWGVDLPSVEAQLGSHRGLHQSVVEEFAKI---ERARTDEGQ---LSP---ATRGAYRDCLGRDLQYAKLL  
MEDLQDMFIVHSIEEIQSLITAHEQFKATLPEADGERQSIMAIQNEVEKVIQSYNIRISSNPYSTVTMDLRTKWDKVK

Target  
lhci. 1. A NSSKARLSLESL-----HGFVAAATKELMWLSEKEEEEVGFDSERNSNMAAKKEAYSALMRELELKEKKIKE  
QLVPIRDQSLQEELARQHANERLRRQFAAQANAIGPWIQNMEEIARSSIQI-TGALEDQMNQLKQYEHNIINYKNNIDK

Target  
lhci. 1. A IQSTGDRLLREDHPARPTVESFQAALQTQWSWMLQLCCIEAHLKENTAYFQFFSDVREAEELRKLTQETLHRKYTCDRS  
LEGDHQLIQEALVFDNKHTNYTMEHIRVGWELLLTTIARTINEVETQIL-----

Target  
lhci. 1. A ITVTRLEDLLQDAQDEKDLNEYRGHLSGLAKRAKAIIVQLTPRNPTQPTRGRVPLLAVCDYKQVEATVHKGDECQMLGPA-----

Target  
lhci. 1. A QPFHWKVLSSSGSEAAVPSVCFLVPPPNQEALAEAVARLEAQHQALVTLWHQLHTDMKSLLAWSLSRDVQLIRSWSLVTF-----

Target  
lhci. 1. A RTLKPEEQRQALRSLELHYQAFLRDSQDAGGFGPEDRLQAEREYGSCSRHYQQLLSLEQGEQESRCQRCISELKD IRL-----

Target  
lhci. 1. A QLEACETRTRVHRLRLPLDKEPARECAQRIAEQQKAQAEVEGLGKGVARLSAEAEKVLALPEPSPAAPT LRSELELTGKL-----

Target  
lhci. 1. A EQVRSLSAIYLEKLTISLVIRSTQGAEELRAHEEQLEKAQAVPAALPELEATKAAMKKLRAQAEAAQPVFDALRDEL R-----

Target  
lhci. 1. A GAQEVGERLQQRHGERDVEVERWRERV TQLLERWQAVLAQTDVRQRELEQLGRQLRYRESADPLGAWLQDARRRQEIQ-----

Target  
lhci. 1. A AVPLADSQAVREQLRQEALLEEIERHAEKVEECQRFQKQYINAIKDYELQLV TYKAQLEPVASPAKKPKVQSGSESVIQ-----

Target  
lhci. 1. A EYVDLRTRYSELSTLTSQYIRFISETLRRMEEERLAEQQRAEERERLAEVEAALEKQRQLAEAHQAQAQAEERAEQELQ-----

Target  
lhci. 1. A RRMQEEVARREEVAVDAQQKRSIQEELQQLRQSSEAEIQAKARQVEAAERSRLRIEEEIRVVRLQLETTERQRGGAEGE-----

Target  
lhci. 1. A LQALRARAEEAEQKRQAQEEAERLRRQVQEETQQRKRQAEELGLRVKAEAAAREKQALQALEELRLQAEEAERRLRQ-----

Target  
lhci. 1. A AEAERARQVQVALETAQRSAQAEQSKHASFAEKTAQLERTLEEEHVTVVQLREEATRREQQAEAEERAREEAERELERW-----

Target  
lhci. 1. A QLKANEALRLRLQAE EVAQKSLAQAEAEKQKEAAEREARRRGKAEQAVRQRELAEQELERQRQLAEGTAQQLAAEQE-----

Target  
lhci. 1. A LIRLRAETEQQEQRQLLEEELARLQSEAAAATQKRQELEAELAKVRAEMEVLLASKARAEESRSSEKSKQRLEAEAG-----

Target  
lhci. 1. A RFRELAEEAARLRALAEAAKRQRQLAEEDAARQRAEAERVLSEKLAAISEATRLKTEAEIALKEKEAENERLRLRAEDEA-----

Target  
lhci. 1. A FQRRRLEEQAQHKADIEERLAQLRKASESELERQKGLVEDTLRQRRQVEEEILALKASFEKAAAGKAELELELGRIRGN-----

Target  
lhci. 1. A AEDTLRSKEQAEQEAARQRQLAAEEERRRREAEERVQKSLAAEEEAARQKAAL EEVERLKAKVEEARRLRERAEHESVR-----

Target  
lhci. 1. A QLQLAQEAAQKRLQAEKKAHAFVQKQELQQTLLQEQSVLEKLRSEAEAAARRAAEEAEARERAEREAAQSRQRVEEA-----

|            |                                                                                    |
|------------|------------------------------------------------------------------------------------|
| lhci. 1. A | -----                                                                              |
| Target     | ERLKQAAEEQAQAQAQAAAAEKLKEAEQEAAARRAQAEQAALRQKQAADAEMEKKHKKFAEQLTRQKAQVEQELTALRLK   |
| lhci. 1. A | -----                                                                              |
| Target     | LEEDHQKSILDQELQRLKAEVTEAARQRSQVEELFSVRVQMEELGKLKARIEAENRALILRDKDNTQRLQEEAEKMK      |
| lhci. 1. A | -----                                                                              |
| Target     | QVAEEAARLSVAAQEAAARLRQLAEEDLAQQRALAEKMLKEKMQAVQEATRLKAEAEELLQQQKELAQEQARRLQEDKEQMA |
| lhci. 1. A | -----                                                                              |
| Target     | QQLAQETQGFQRTLETERQRQLEMSAEAEERLRLRVAEMSRAQARAEEDAQRFKQAEIIGAKLHRTELATQEKVTLVQTL   |
| lhci. 1. A | -----                                                                              |
| Target     | ETQRQQSDRDADRLREAIAELEREKDKLKKEAELLQLKSEEMQTVQQEQLLQETQALQQSFLSEKDSLLQRERFIEEKA    |
| lhci. 1. A | -----                                                                              |
| Target     | KLERLFQDEVAKAQLREEQQRQQQMQUEKQQLLASMEEARRRQHEAEEGVRRKQEELQLEQQRQQEQLLAEENRRL       |
| lhci. 1. A | -----                                                                              |
| Target     | RERLEHLEEEHRAALAHSEEITAAQAAATRALPNGQDAADGPAAPEHAFEGLRQKVPAQQLQEAGILSTEELQRLAQGH    |
| lhci. 1. A | -----                                                                              |
| Target     | TTVAELTQREDVRRYLQGHSSIAGLLLPANEKLTIIAALRRQLLSPGTALILLEAQAAASGFLDPVRNRRLTVTEAVKE    |
| lhci. 1. A | -----                                                                              |
| Target     | GVVGPELHHKLLSAERAVTGYKDPYTGEKISLQFQAMKKDLIVREHGIRLLEAQIATGGVIDPVHSHRVPVDVAYHRGYFD  |
| lhci. 1. A | -----                                                                              |
| Target     | EEMNRVLQDPSDDTKGFFDPNTHENLYLQLLERCVEDPETGLRLLPLTDQAAKGGLVYTDSEARDVFEEKATVSAPFGK    |
| lhci. 1. A | -----                                                                              |
| Target     | FQGKTVTIWELINSEYFTAQRRDLLRQFRTGKVTVEKIIKIVITVIEEHEQKQQLCFQGLRALVPAELLESIGIIDWDL    |
| lhci. 1. A | -----                                                                              |
| Target     | FRQLQLGERSVQEVAEVEGVRRALRGSGVIAGVWLEEARQKLSIYEALKKELLQPEAAVALLEAQAGTGHVIDPAT SARL  |
| lhci. 1. A | -----                                                                              |
| Target     | TVDEAVRAGLVGPHELHEKLLSAEKAVTGYKDPYSGQSVSLFQALKKGLIPREQGLRLDQALSTGGTVDPKSHRPLDV     |
| lhci. 1. A | -----                                                                              |
| Target     | ACARGYLDEETSTALSAPRDDAKTYYPRTWELATYSQLQQCRPDPLTGLSLLPLSEEAARARQQELYSEVQAREAFQK     |
| lhci. 1. A | -----                                                                              |
| Target     | ATVEVPVGSFQGRAVTIWELINSEYFTAQEQELLRQFRTGKVTVEKIIKIVITIVEEVETTRRERLSFSGLRAPVPASE    |
| lhci. 1. A | -----                                                                              |
| Target     | LLAAGILSSSQFEQLKDGKTSVKDLSELSSLQTLQSGGCLAGIYLESKEKVTIYEAMRRGLLRPSTAILLEAQAAATG     |
| lhci. 1. A | -----                                                                              |
| Target     | FLVDPVRNQRLYVHEAVKAGVVGPELHEKLLSAEKAVTGYKDPYSGSTISLQFQAMKKGLVREHGIRLLEAQIATGGIID   |
| lhci. 1. A | -----                                                                              |
| Target     | PVHSHRVPVDVACQRGYFDEEMNRVLEDPSDDTKGFFDPNTHENLYRQLLERCVEDPETGLRLLPLKGPEKAEVVETTR    |
| lhci. 1. A | -----                                                                              |
| Target     | VYTEETTRAFEETQIDIPGGGSHGGSTMSLWEVMQSDLIPEEQRAQLMADFQAGRVTKERMIIIIIEIEIEKTEIVRQQN   |
| lhci. 1. A | -----                                                                              |
| Target     | LASYDYVRRRLTAEDLYEARVISRESYSLLREGTRSLREVLEAESAWRYLYGTGCVAGVYLPQSRQTLPIYQALKKGLLS   |
| lhci. 1. A | -----                                                                              |
| Target     | AEVARLLLEAQAAATGFLDPVKGERLTVDEAVRKGVLGPELHDRLLSAERAVTGYRDPYTEQTISLQFQAMKKDLIPAEAA  |
| lhci. 1. A | -----                                                                              |
| Target     | LRLDQALATGGIVDPRLGFHLPLEVAYQRGYLNKDTHDQLSEPSEVRSYVDPSTDERLSYQQLRRRCRRDETSGFLFLP    |
| lhci. 1. A | -----                                                                              |
| Target     | LSEARKLTFRGLRKQITVEELVRSHVMDEATAQRLQEGLTSIEEVSKNLQKFLEGTSSIAGVLVDATKERLSVYQAMKKG   |
| lhci. 1. A | -----                                                                              |
| Target     | IIRPGTAFELLEAQAAATGYVIDPIKGLKLTVEEAVRMGIVGPEFKDKLLSAERAVTGYKDPYSGKLSLQFQAMKKGLILK  |
| lhci. 1. A | -----                                                                              |



Target  
lhci. 1. A

DHGIRLLEAQIATGGIIDPEESHRLPVDVAYQRGLFDEEMNEILTDPSDDTKGFFDPNTEENLTYLQLMERCVTDPQTGL

Target  
lhci. 1. A

RLPLKEKKRERKTSSKSSVRKRRVIVDPETGKEMSVYEAYRKGLIDHQTYLELSEQECEWEEITISSSDGVVKSMIID

Target  
lhci. 1. A

RRSGRQYDIDEAIAKSLIDRSALDQYRAGTLSITEFADMLSGNAGGFRSRSSSVGSSSSYPISPAVSRTQLASWSDPTEE

Target  
lhci. 1. A

TGPVAGILDDETLEKVSITEAMHRNLVDNITGQRLLEAACTGGIIDPNTGERFPVTDVANKGLVDKIMVDRINLAQKAF

Target  
lhci. 1. A

CGFEDPRTKTKMSAAQALKGWLYYEAGQRFLEVQYLTTGGLIEPDTGPRVPLDEALQRGTVDARTAQKLRDVSAYSKYLT

Target  
lhci. 1. A

CPKTKLKISYKDALDRSMVEEGTGLRLLLEAAAQSSKGYSPYSVSGSGSTTGSRSRSTGSRAGSRRGSFDTATGSGFSMT

Target  
lhci. 1. A

FSSSSYSSSGYGRRYASGPTSSLGGPESAAA

| Model #14                                                                         | File | Built with    | Oligo-State | Ligands | GMQE | QMEANDisCo Global |
|-----------------------------------------------------------------------------------|------|---------------|-------------|---------|------|-------------------|
|  | PDB  | ProMod3 3.3.0 | monomer     | None    | 0.00 | 0.43 ± 0.05       |

| Template | Seq Identity | Oligo-state | QSQE | Found by | Method | Resolution | Seq Similarity | Range     | Coverage | Description     |
|----------|--------------|-------------|------|----------|--------|------------|----------------|-----------|----------|-----------------|
| 7ank.1.A | 12.69        | monomer     | 0.00 | HHblits  | X-ray  | 3.20Å      | 0.27           | 187 - 904 | 0.10     | Alpha-actinin-2 |

The template contained no ligands.

Target  
7ank. 1. A

MSGEDQEVRAVVEDGSNGSGSPSPGDTLPWNLEKTQRSRRGGGGPGNGSVLDPAERAVIRIADERDRVQKKTFTKWVN

Target  
7ank. 1. A

KHLIKQRHISDLYEDLRDGHNLISLLEVLSGDSLPREKGRMRFHKLQNVQIALDYLHRHQVKLVNIRNDDIADGNPKLT

Target  
7ank. 1. A

LGLIWTIILHFQISDIQVSGQSEDMTAKEKLLWSQRMVEGYQGLRCDNFTSSWRDGRLFNAIIHRHKPMLIDMNK--VY  
-----QRKFTAWCNSHLRKA-GTQIENIEEDFRNGLKMLLLEVISGERLPKPD RGKM

Target  
7ank. 1. A

RQTNLENLDQAFSVAERDLGVT-RLDPEDVDVPQPEKSIITYVSSLYDAMPVPDVQDGVKANELQLRWQEYRELVL  
RFHKIANVNKALDYIA-SKGVLVSIGAEIIVDGNV--KMTLGMWTIILRFAIQDISVE-----ETSAKEG

Target  
7ank. 1. A

LLQWIRAHTAAFE---ERRFPSSFEEIEILWCQFLKFKETELPAKEAD---KNRSKGIYQSLEGAVQAGQLKVP  
PGYHP  
LLLWCQRKTAPYRNVNIQNFHTSWKDLGLCALIHRHPDLIDYSKLNKDDPIGNINLAMEIAEK----HLDIPKMLDA

Target  
7ank. 1. A

LDVEKEWGLHVAILEREQLRSEFERLERLQRIVSKLQMEAGLCEEQLNQADALLQSDVRLLAAGKAPQRAGEVERDLD  
EDIVNT-P-----KPDER--AIMTYVSCFYHAFAGAEQ-----AET---

Target  
7ank. 1. A

KADGMIRLLFNDVQALKDGRHPQGEQMYRRVYRLHERLVAIRTEYNRLRGTPRHPELEDSTLRYLQDLLAWVEENQRRV  
-A-----ANRICKVLAVNQENER-----LMEEYERLASELLEWIRRTIPWL

Target  
7ank. 1. A

DSAEWGVDLPSVEAQLGSHRGLHQSVEEFRAKIERARTDEGQLSPATRGAYRDCGLRDLQYAKLLNSSKARLSLES  
LH  
ENRTPEKTMQAMQKLEDFRDYRRKHKPP---KV-----QEKQLEINFNTLQTKLR-----

Target  
7ank. 1. A

GFVAAATKELMWLSEKEEEVGFWDSESRNSMAAKKEAYSALMRELELKEKKIKEIQSTGDRLLREDHPARP  
TVESFQAA  
-----I-----SNRPAFMPSEGMVSD

Target  
7ank. 1. A

LQTQWSWMLQLCCCEIAHLKE-----NTAYFQFFSDVREAEELRKLQETLHRKYTCDRSI-TVTRLEDLLQDAQDE  
IAGAWQRLEQAEKGYEELLNEIRRLERLEHLAEKFRQKASTHETWAYGKEQILL---QKDYESASLTEVRALLRKHEAF

Target  
7ank. 1. A

KDQLNEYRGHLSGLAKRAKAIIVQLTPRNPTQPTRGRVPLLAVCDYKQVEATVHKGDECQMLGPAQPFHWKVLSSSGSEAA  
ESDLAAHQDRVEQIAAIAQELNELDY--H-----

Target VPSVCFLVPPPNQEALAEAVARLEAQHQALVTLWHQLHTDMKSLLAWQSLSRDVQLIRSWSLVTFRTLKPEEQRQALRSLE  
7ank. 1. A -----DAVNVNDRQCQKICDQWDRLGTLTQKRREALERM-----

Target LHYYAFLRDSQDAGGFGPEDRLQAEREYGSCSRHYQQLLSLEQGEQEESSRCQRCISELKDIRLQLEACETRIVHRLRLP  
7ank. 1. A -----

Target LDKEPARECAQRIAEQQKAQAEVEGLGKGVARLSAEAEKVLAPEPSPAAPTLRSELELTGKLEQVRSLSAIYLEKLKT  
7ank. 1. A -----

Target ISLVIRSTQGAEELRAHEEQLEKAQAVPAALPELEATKAAMKKLRAQAEAAQPVFDALRDELGAQEVGERLQQRHGER  
7ank. 1. A -----

Target DVEVERWRERVLTLLERWQAVLAQTDVRQRELEQLGRQLRYRESADPLGAWLQDARRRQEQIQAVPLADSQAVREQLRQ  
7ank. 1. A -----

Target EKALLEEIERHAEKVEECQRFQKQYINAIKDYELQLVITYKAQLEPVASPAKKPKVQSGSESVIQEYVDLRTYSELSTLT  
7ank. 1. A -----

Target SQYIRFISETLRRMEEERLAEQQRAEERERLAEVEAALEKQRQLAEAHAQAKAQAEAEQELQRRMQEEVARREEVAVD  
7ank. 1. A -----

Target AQQQKRSIQEELQQLRQSSEAEIQAKARQVEAAERSRLRIEEIIRVVRLQLETTERRGGAEQELQALRAREEAEQKR  
7ank. 1. A -----

Target QAQEEAERLRRQVQEEQTKRQRAEELGLRVKAEAEAREKQRALQALEELRLQAEAEERRLQAEAEERARQVQVALETA  
7ank. 1. A -----

Target QRSQAELQSKHASFAEKTAQLERTLEEEHVTVVQLREEATRREQQAEERAREEAERELERWQLKANEALRLRLQAE  
7ank. 1. A -----

Target VAQQKSLAQAEAEKQKEAAEREARRRGKAEQAVRQRELAEQELERQRLAEGTAQQLAAEQELIRLRAETEQGEQQRQ  
7ank. 1. A -----

Target LLEEELARLQSEAAAATQKRQLEAEALAKVRAEMEVLLASKARAEESRSSEKSKRLEAEAGRFRELAEEAARLRALA  
7ank. 1. A -----

Target EEAKRQRLAEEDAARQRAEAERVLSEKLAATSEATRLKTEAEIALKEKEAENERLRLRAEDEAFQRRRLEEQAQHKAD  
7ank. 1. A -----

Target IEERLAQLRKASESELERQKGLVEDTLRQRQVVEEILALKASFEEKAAAGKAELELELGRIIGNAEDTLRSKEQAEQEA  
7ank. 1. A -----

Target RQRQLAAEEERRRREAEEERVQKSLAEEEAARQKAALVEVERLKAKVEEARRLRERAEHESVRQLLAQEAQKRLQAE  
7ank. 1. A -----

Target EKAHAFVQKEQELQQTQQEQSVLEKLRSAAEARRAAEEAEERARAEREAAQSRQVVEAERLKQAAEEQAQAAQ  
7ank. 1. A -----

Target AQAAAEKLRKEAEQEAARRAQAEQAALRQKQAADAEMEKKHFAEQTLRQKAQVEQELTALRLKLETDHQSILDQELQ  
7ank. 1. A -----

Target RLKAEVTEAARQRSQVEEELFSVRVQMEELGKLKARIEAENRALILRDKDNTQRLQEEAEKMKQVAEEAARLSVAAQEA  
7ank. 1. A -----

Target ARLRQLAEEDLAQQRALAEKMLKEQMVAQVQATRLKAEALLQQQKELAQEQARRLQEDKEQMAQQLAQETQGFQRTLET  
7ank. 1. A -----

Target ERQRQLEMSAEERLRLRVAEMSRAQARAEEDAQRFKQAEIIGAKLHRTLATQEKVTLVQTLETQRQQSDRDADRLRE  
7ank. 1. A -----

Target AIAELEREKDKLKEAELLQLKSEEMQTVQQEQQLQETQALQQSFLSEKDSLLQRERFIEEEKAKLERLFQDEVAKAQKL  
7ank. 1. A -----

Target REEQQRQQQMQQEKQQLLASMEEARRRQHEAEEGVRRKQEELQLLEQQRQQQEQLLAEENRRLRERLEHLEEEHRAALA  
7ank. 1. A -----

Target HSEEITAAQAAATRALPNGQDAADGPAAEPEHAFEGLRQKVPAQQLQEAGILSTEELQRLAQGHTTVAELTQREDVRRYL  
7ank. 1. A -----

Target QGHSSIAGLLLKPANEKLTIIAALRRQLLSPGTALILLEAQAAASGFLDPVRNRRLTVTEAVKEGVVGPPELHHKLLSAER  
7ank. 1. A -----

Target AVTGYKDPYTGEKISLQFQAMKKDLIVREHGIRLLEAQIATGGVIDPVHSHRVPVDVAYHGRGYFDEEMNRVLQDPSDDTKG  
7ank. 1. A -----

|                      |                                                                                             |
|----------------------|---------------------------------------------------------------------------------------------|
| Target<br>7ank. 1. A | FFDPNTHENLTYLQLLERCVDPETGLRLLPLTDQAAKGGLVYTDSEARDVFEKATVSAPFGKFQGKTVTIWELINSEY<br>-----     |
| Target<br>7ank. 1. A | FTAEQRDDLRRQFRTGKVTVEKIIKIVITVIEEHEQKQLCFQGLRALVPAAELLESGLIDWDLFRQLQLGERSVQEVAE<br>-----    |
| Target<br>7ank. 1. A | VEGVRRALRGSGVIAGVWLEEARQKLSIYEALKKELLQPEAAVALLEAQAGTGHVIDPAT SARLTVDEAVRAGLVGPELH<br>-----  |
| Target<br>7ank. 1. A | EKLLSAEKAVTGYKDPYSGQSVSLFQALKKGLIPREQGLRLDDAQLSTGGTVDPKSHRLPLDVACARGYLDEETSTALS<br>-----    |
| Target<br>7ank. 1. A | APRDDAKTYDPRTWELATYSQLQQCRPDPLTGLSLLPLSEEAARARQQELYSEVQAREAFQKATVEVPVGSFQGRAVT<br>-----     |
| Target<br>7ank. 1. A | IWELINSEYFTAEQRQELLRQFRTGKVTVEKIIKIVITVIEEVETRRERLSFSGLRAPVPASELLAAGILSSSQFEQLK<br>-----    |
| Target<br>7ank. 1. A | DGKTSVKDLSELSSLQTLQSGCLAGIYLESKEKVTIYEAMRRGLLRPSTAILLLEAQAATGFLVDPVRNQRLYVHEA<br>-----      |
| Target<br>7ank. 1. A | VKAGVVGPELHEKLLSAEKAVTGYKDPYSGSTISLFQAMKKGLVREHGIRLLEAQIATGGIDPVHSHRVPVDVACQRG<br>-----     |
| Target<br>7ank. 1. A | YFDEEMNRVLEDPSDDTKGFFDPNTHENLTYRQLLERCVDPETGLRLLPLKGPEKAEVVETTRVYTEEETRRAFEETQI<br>-----    |
| Target<br>7ank. 1. A | DIPGGSHGGSTMSLWEVMQSDLIPEEQRAQLMADFQAGRVTKERMIIIIEIEKTEIVRQQNLASYDYVRRRLTAEDL<br>-----      |
| Target<br>7ank. 1. A | YEARVISRESYSLLREGTRSLREVLEAESAWRYLYGTGCVAGVYLPGSRQTLPIYQALKKGLLSAEVARLLLEAQAATGF<br>-----   |
| Target<br>7ank. 1. A | LLDPVKGERLTVDEAVRKGVLGPELHDLRLLSAERAVTGYRDPYTEQTISLFQAMKKDLIPAEELRLDDAQLATGGIVDP<br>-----   |
| Target<br>7ank. 1. A | RLGFHLPLEVAYQRYLNDTHDQLSEPSEVRSYVDPSTDERLSYQLLRRCRRDETSGLFLLPLSEARKLTFRGLRKQI<br>-----      |
| Target<br>7ank. 1. A | TVEELVRSHVMDEATAQRLQEGLTSSIEEVSKNLQKFLEGTSSIAGVLVDATKERLSVYQAMKKGIIRPGTAFELLEQAQA<br>-----  |
| Target<br>7ank. 1. A | TGYVIDPIKGLKLTVEEAVRMGIVGPEFKDKLLSAERAVTGYKDPYSGKLIISLFQAMKKGLILKDHGIRLLEAQIATGGI<br>-----  |
| Target<br>7ank. 1. A | IDPEESHRLPVDVAYQRLFDEEMNEILTDPSDDTKGFFDPNTEENLTYLQLMERCVTDPQTGLRLLPLKEKKRERKTSS<br>-----    |
| Target<br>7ank. 1. A | KSSVRKRRVIVDPETGKEMSVYEAYRKGLIDHQTYLELSEQECEWEEITISSSDGVVKSMIIDRRSGRQYDIDEAIAKS<br>-----    |
| Target<br>7ank. 1. A | LIDRSALDQYRAGTLSITEFADMLSGNAGGFRSRSSSVGSSSSYPISPAVSRTLASWSDPTEETGPVAGILDTETLEKV<br>-----    |
| Target<br>7ank. 1. A | SITEAMHRNLVDNITGQRLLEAQAQCTGGIDPNTGERFPVTDVANKGLVDKIMVDRINLAQKAFCGFEDPRTKTKMSAAQ<br>-----   |
| Target<br>7ank. 1. A | ALKKGWLYYEAGQRFLEVQYLTGGLIEPDTPGRVPLDEALQRGTVDARTAQKL RDVSAYS KYLTCPKTKLKISYKDALDR<br>----- |
| Target<br>7ank. 1. A | SMVEEGTGLRLLEAAAQSSKGYSPYSVSGSGSTTGSRSGSRTGSRAGSRRGSF DATGSGFSMTFSSSSYSSSGYGRRYA<br>-----   |
| Target<br>7ank. 1. A | SGPTSSLGGPESAAA<br>-----                                                                    |

| Model #02                                                                         | File | Built with    | Oligo-State | Ligands | GMQE | QMEANDisCo Global |
|-----------------------------------------------------------------------------------|------|---------------|-------------|---------|------|-------------------|
|  | PDB  | ProMod3 3.3.0 | monomer     | None    | 0.00 | 0.53 ± 0.05       |

| Template | Seq Identity | Oligo-state | QSQE | Found by | Method | Resolution | Seq Similarity | Range       | Coverage | Description |
|----------|--------------|-------------|------|----------|--------|------------|----------------|-------------|----------|-------------|
| 5dzz.1.A | 45.12        | monomer     | 0.00 | BLAST    | X-ray  | 2.60Å      | 0.40           | 3049 - 3553 | 0.10     | Desmoplakin |

The template contained no ligands.

|                      |                                                                                            |
|----------------------|--------------------------------------------------------------------------------------------|
| Target<br>5dzz. 1. A | MSGEDQEVRAVVEDGSNGGSGSPSPGDTLPWNLEKTQRSRRGGGGPGNGSVLDPAERAVIRIADERDRVQKKTFTKWVN<br>-----   |
| Target<br>5dzz. 1. A | KHLIKAQRHISDLYEDLRDGHNLISLLEVLSGDSLPREKGRMRFHKLQNVQIALDYLHRHQVKLVNIRNDDIADGNPKLT<br>-----  |
| Target<br>5dzz. 1. A | LGLIWTIILHFQISDIQVSGQSEDMTAKEKLLWSQRMVEGYQGLRCDNFTSSWRDGRLFNAIIHRHKPMLIDMNKVYRQ<br>-----   |
| Target<br>5dzz. 1. A | TNLENLDQAFSVAERDLGVTRLDPEDVDVPQPEKSIITYVSSLYDAMPRPVDVQDGVKANELQLRWQEYRELVLVLLQ<br>-----    |
| Target<br>5dzz. 1. A | WIRAHTAAFEERRFPSSFEEIEILWCQFLKFKETELPAKEADKNRSKGIYQSLEGAVQAGQLKVPPGYHPLDVEKEWGKL<br>-----  |
| Target<br>5dzz. 1. A | HVAILEREKQLRSEFERLERLQRIVSKLQMEAGLCEEQLNQADALLQSDVRLLAAGKAPQRAGEVERDLKADGMIRLLF<br>-----   |
| Target<br>5dzz. 1. A | NDVQALKDGRHPQGEQMYRRVYRLHERLVAIRTEYNLRLRGTPRHPELEDSTLRYLQDLLAWVEENQRRVDSAEGVDLP<br>-----   |
| Target<br>5dzz. 1. A | SVEAQLGSHRGLHQSVVEEFRAKIERARTDEGQLSPATRGAYRDCLGRDLQYAKLLNSSKARLSLESLSHGFWAAATKEL<br>-----  |
| Target<br>5dzz. 1. A | MWLSEKEEEEVGFWDWERNNSNMAAKKEAYSALMRELELKEKKIKEIQSTGDRLLREDHPARPTVESFQAALQTQWSWMLQ<br>----- |
| Target<br>5dzz. 1. A | LCCIEAHLKENTAYFQFFSDVREAEEQLRKLQETLHRKYTCDRSITVTRLEDLLQDAQDEKQQLNEYRGHLSGLAKRAK<br>-----   |
| Target<br>5dzz. 1. A | AIVQLTPRNPTQPTRGRVPLLAVCDYKVEATVHKGDECQMLGPAQPFHVKVLSSSGSEAAVPSVCFLVPPPNQEALAV<br>-----    |
| Target<br>5dzz. 1. A | ARLEAQHQALVTLWHQLHTDMKSLLAWQSLSRDVQLIRSWSLVTFRTLKPEEQRQALRSLELHYQAFLRDSQDAGGFGPE<br>-----  |
| Target<br>5dzz. 1. A | DRLQAEREYGSCSRHYQQLLSLEQGEQEESRCRCISELKDIRLQLEACETRIVHRLRLPLDKEPARECAQRIAEQKA<br>-----     |
| Target<br>5dzz. 1. A | QAEVEGLGKGVARLSAAEAKVLALPEPSPAAPTLRSELELTGKLEQVRSLSAIYLEKLKTIISLVIRSTQGAEELRAHE<br>-----   |
| Target<br>5dzz. 1. A | EQLKEAQAVPAALPELEATKAAMKKLRAQAEAAQPVFDALRDELRGAEVGERLQQRHGERDVEVERWRERVTLQLLRWQ<br>-----   |
| Target<br>5dzz. 1. A | AVLAQTDVRQRELEQLGRQLRYRESADPLGAWLQDARRRQEIQAVPLADSQAVREQLRQEKALLEEIERHAEKVEECQ<br>-----    |
| Target<br>5dzz. 1. A | RFAKQYINAIKDYEQLVITYKAQLEPVASPAKKPKVQSGSESVIQEYVDLRTRYSELSTLTSQYIRFISETLRRMEEER<br>-----   |
| Target<br>5dzz. 1. A | LAEQQRAEERERLAEVEAALEKQRQLAEAHQAQAQAEAAQELQRRMQEEVARREEVAVDAQQKRSIQEELQQLRQSS<br>-----     |
| Target<br>5dzz. 1. A | EAEIQAKARQVEAAERSRLRIEEIIRVVRLQLETTERQRGGAEGELQALRARAEAEAAQKRQAQEEAERLRRQVQEETQR<br>-----  |

Target 5dzz. 1. A KRQAEAEGLRVKAEAEAREKQRALQALEELRLQAEAEERRLRQAEAEERARQVQVALETAQRSQAELQSKHASFAEKT-----

Target 5dzz. 1. A AQLERTLEEEHVTVVQLREEATRREQQAEAEERAREEAERELERWQLKANEALRLRLQAE EVAQQKSLAQAEAEKQKEAA-----

Target 5dzz. 1. A EREARRRGKAEQAVRQRELAEQELERQRQLAEGTAQQLAAEQELIRLRAETEQQEQQRQLLEEELARLQSEAAAAATQK-----

Target 5dzz. 1. A RQELEAELAKVRAEMEVLLASKARAEESRSSEKSKQRLEAEAGRFRELAEEAARLRALAEAEAKRQRQLAEEDAARQRA-----

Target 5dzz. 1. A EAERVLSEKLAAISEATRLKTEAEIALKEKEAENERLRLRLAEDEAFQRRRLEEQAQHKADIEERLAQLRKASESELERQ-----

Target 5dzz. 1. A KGLVEDTLRQRRQVEEEILALKASFEEAAAGKAELELELGRIRGNAEDTLRSKEQAEQEAARQRQLAAEEERRRRREAEEER-----

Target 5dzz. 1. A VQKSLAAEEEAARQRKAALAEVERLKAKVVEEARRLRERAEHESVRQLQLAQEAQKRLQAE EKAHAFVQQKEQELQQT-----

Target 5dzz. 1. A QQEQSVLEKL RSEAEAAARRAAEEAEARERAREEAQSRQRVEEAERLKQAAEEQAQAQAQAQAAAEKL RKEAEQEAARR-----

Target 5dzz. 1. A AQAEQAALRQKQAADAEMEKHKFAEQTLRQKAQVEQELTALRLKLEETDHQKSILDQELQRLKA EVTEAARQRSQVEEE-----

Target 5dzz. 1. A LFSVRVQMEELGK LKARIEAENRALILRDKDNTQRLLQEEAEKMKQVAEEAARLSVAAQEAARLRQLAEEDLAQQRALAE-----

Target 5dzz. 1. A KMLKEKMQAVQEATRLKAEAE LLQQQKELAQEQARRLQEDKEQMAQQLAQETQGFQRTLETERQRQLEMSAEERLRLRV-----

Target 5dzz. 1. A AEMSRAQARAEEDAQRFRKQAEETGAKLHRTELATQEKVTLVQTLETQRQQSDRDADRLREAI AELEREKDKLKKEAE LL-----

Target 5dzz. 1. A QLKSEEMQTVQQEQ LLQETQALQQSFLSEKDSLLQRERFIEEEKAKLERLFQDEVAKA QKLREEQQRQQQMQQEKQ LL-----

Target 5dzz. 1. A ASMEEARRRQHEAE EGVRRKQEELQLLEQQRQQQEQLLAENRRLRERLEHLEEEHRAALAHSEEITAAQAAATRALPNG-----

Target 5dzz. 1. A QDAADGPAAEP EHA FEGLRQKVPAAQLQEAGILSTEELQRLAQGHTTVAELTQREDVRRYLQGHSSIAGLLLPANEKLT-----

Target 5dzz. 1. A IYAALRRQLLSPGTALILLEAQ AASGFLDPVRNRRLTVTEAVKEGVGP ELP HHLKLSAERAVTGYKDPYTGEKISLFQA-----

Target 5dzz. 1. A MKKDLIVREHGIRLLEAQIATGGVIDPVHSHRVPVDVAYHRYGFDEEMNRVLQDPSDDTKGFFDPNTHENLTYLQLLERC-----

Target 5dzz. 1. A VEDPETGLRLLPLTDQAAKG GELVYTDSEARDVFEKATVSAPFGKFQGKTVTIWELINSEYFTA EQRRDLLRQFRTGKVT-----

Target 5dzz. 1. A VEKIIKIVITVIEEHEQKGQLCFQGLRALVPAAELLESIGIDWDLFRQLQLGERSVQEVAEVEGVRRALRGSGVIAGVWL-----

Target 5dzz. 1. A EEARQKLSIYEALKKELLQPEAAVALLEAQAGTGHV IDPATSARLTVDEAVRAGLVGP ELPHEKLLSAEKAVTGYKDPYSG-----VFDGLRKKV-----TAMQLYECQLIDKTTLDKLLKGKKSVEE-----VASEIQPFLRGAGSIAGASAPK-----

Target 5dzz. 1. A QSVSLFQALKKGLIPREQGLRL LDAQLSTGGTVDP SKSHRLPLDVACAR-----GYLDEETSTALS EKYSLV EAKRKKLISPESTVMLLEAQ AATGGIIDPHRNEKLTVD SAIARDLIDFDDRQIYAAEKAITGFDDPFSGKTVS-----

Target 5dzz. 1. A APRDDAKTYYPRTWELATYSQLQQCRPDPLTGLSLLPLSEEAARAR--QQELYSEVQAREAFQKATVEVPVGSFQGRAV VSEATIKKNLIDRETGMRLLEAQIASGGVDPVNSV-FLPKDVALARGLIDRDLYRSLNDPRDSQKNFVD-PVTKKKVSYV-----

Target 5dzz. 1. A TIWELINSEYFTA EQRQELLRQFRTGKVTVEKIIKIVITVIEEVETTRRERLSFSGLRAPVPASELLAAGILSSSQFEQL QLKERCRIEPTG-----LLLLSVQKRSM SFQGI RQPVTVTELVD SGILRPSTVNEL-----

Target 5dzz. 1. A KDGKTSVKDLSELSSLQTL LQGSGCLAGIYLESKEKVTIYEAMRRGLLRPSTAILLLEAQ AATGFLVDPVRNQRLYVHE ESGQISYDEVERIKDFLQGSSCI--AGIYNETTKQLGIYEAMKIGLVRPGTALELLEAQ AATGFIVDPVSNLRLPVEE-----

Target 5dzz. 1. A AVKAGVVGPELPHEKLLSAEKAVTGYKDPYSGSTISLFQAMKGLV VREHGIRLLEAQIATGGIIDPVHSHRVPVDVACQR AYKRGLVGIEFKEKLLSAERAVTGYNDPETGNIISLFQAMNKELIEKGHGIRLLEAQIATGGIIDPKESHRLPVDIAYKR-----

Target  
5dzz. 1. A

GYFDEEMNRVLEDPSDDTKGFFDPNTHENLTYRQLLERCVEDPETGLRLLPLKGPEKAEVVETTRVYTEEETRRAFEETQ  
GYFNEELSEILSDPSDDTKGFFDPNTEENLTYLQLKERICKDEETGLCLLPLK-----

Target  
5dzz. 1. A

IDIPGGGSHGGSTMSLWEVMQSDLIPEEQRAQLMADFQAGRVTKERMIIIIIEIEIEKTEIVRQQNLASYDYVRRRLTAED  
-----

Target  
5dzz. 1. A

LYEARVISRESYSLLREGTRSLREVLEAESAWRYLYGTGCVAGVYLPGSRQTLPIYQALKKGLLSAEVARLLLEAQATG  
-----

Target  
5dzz. 1. A

FLLDPVKGERLTVDEAVRKGLVGPELHDLRLLSAERAVTGYRDPYTEQTISLFQAMKKDLIPAEALRLDDAQLATGGIVD  
-----

Target  
5dzz. 1. A

PRLGFHLPLEVAYQRGYLNKDDHQLSEPSEVRSYVDPSTDERLSYTLQLRRCRRDETSGFLPLPLSEARKLTFRGLRKQ  
-----

Target  
5dzz. 1. A

ITVEELVRSHVMDEATAQRLQEGLTSSIEEVSKNLQKFLEGTSSIAGVLVDATKERLSVYQAMKGGIIRPGTAFELLEAAQ  
-----

Target  
5dzz. 1. A

ATGYVIDPIKGLKLTVEEAVRMGIVGPEFKDKLLSAERAVTGYKDPYSGKLISLFQAMKKGLILKDHGIRLLEAQIATGG  
-----

Target  
5dzz. 1. A

IIDPEESHRLPVDVAYQRGLFDEEMNEILTDPSDDTKGFFDPNTEENLTYLQLMERCVTDPQTGLRLLPLKEKKRERKTS  
-----

Target  
5dzz. 1. A

SKSSVRKRRVVIVDPETGKEMSVYEAYRKGLIDHQTYLELSECEWEIEITISSDGVVKSMIIDRRSGRQYDIDEAIAK  
-----

Target  
5dzz. 1. A

SLIDRSALDQYRAGTSLSITEFADMLSGNAGGFRSRSSSVGSSSSYPISPAVSRTQLASWSDPTEETGPVAGILDDETLEK  
-----

Target  
5dzz. 1. A

VSITEAMHRNLVDNITGQRLLEAQAQTGGIIDPNTGERFPVTDVANKGLVDKIMVDRINLAQKAFCGFEDPRTKTKMSAA  
-----

Target  
5dzz. 1. A

QALKKGWLYYEAGQRFLEVQYLTGGLIEPDTPGRVPLDEALQRGTVDARTAQKL RDVSAYSKYLTCPKTKLKI SYKDALD  
-----

Target  
5dzz. 1. A

RSMVEEGTGLRLLEAAAQSSKGYSPYSVSGSGSTTGSRSRGTGSRAGSRGSDATGSGFSMTFSSSSYSSSGYGRRY  
-----

Target  
5dzz. 1. A

ASGPTSSLGGPESAAA  
-----

| Model #18                                                                           | File | Built with    | Oligo-State                   | Ligands | GMQE | QMEANDisCo Global |
|-------------------------------------------------------------------------------------|------|---------------|-------------------------------|---------|------|-------------------|
|  | PDB  | ProMod3 3.3.0 | monomer (matching prediction) | None    | 0.00 | 0.44 ± 0.05       |

| Template | Seq Identity | Oligo-state | QSQE | Found by | Method | Resolution | Seq Similarity | Range      | Coverage | Description     |
|----------|--------------|-------------|------|----------|--------|------------|----------------|------------|----------|-----------------|
| 4d1e.1.A | 12.65        | homo-dimer  | 0.00 | HHblits  | X-ray  | 3.50Å      | 0.26           | 627 - 1221 | 0.09     | ALPHA-ACTININ-2 |

The template contained no ligands.

Target  
4d1e. 1. A

MSGEDQEVRAVVEDGSNGGSGSPSPGDTLPWNLEKTQSRRRGGGGPGNGSVLDP AERAVIRIADERDRVQKKTFTKWVN  
-----

Target  
4d1e. 1. A

KHLIKAQRHISDLYEDLRDGHNLISLLEVLSGDSLPREKGRMRFHKLQNVQIALDYL RHRQVKLVNIRNDDIADGNPKLT  
-----

Target  
4d1e. 1. A

LGLIWTIILHFQISDIQVSGQSEDMTAKEKLLWSQRMVEGYQGLRCDNFTSSWRDGRLFNAI IHRHKPMLIDMNKVYRQ  
-----

Target  
4d1e. 1. A

TNLENLDQAFSVAERDLGVTRLLDPEDVDVPQPEKSIITYVSSLYDAMP RVPDVQDGVKANELQLRWQEYRELVL LLLQ  
-----

Target  
4dle. 1. A WIRAHTAAFEERRFPSSFEEIEILWCQFLKFKETELPAKEADKNRSGIYQSLEGAVQAGQLKVPPTYHPLDVEKEWGL  
-----

Target  
4dle. 1. A HVAILEREKQLRSEFERLERLQRIVSKLQMEAGLCEEQLNQADALLQSDVRLAAGKAPQRAGEVERDLKADGMIRLLF  
-----

Target  
4dle. 1. A NDVQALKDGRHPQGEQMYRRVYRLHERLVAIRTEYNLRLRGTPRHPELEDSTLRYLQDLLAWVEENQRRVDSAEGWVDLP  
-----

Target  
4dle. 1. A SVEAQLGSHRGLHQSVVEEFAKIERARTDEGQLSPATRGAYRDCLGRDLQYAKLLNSSKARLSLES LHGFVAAATKEL  
-----RLMEEYERLASELL

Target  
4dle. 1. A MWLSEKEEEVGFWDSESNMAAKKEAYSALMRELELKEKKIK-EIQST---GDRLL-REDHPARPTVESFQAALQTQ  
EWIRRTIPWLENRTPAATMQAMQKLEDFRDYRRKHKPKVQEKCLEINFNTLQTKLRISNRPAFMPSEGKMVSDIAGA

Target  
4dle. 1. A WSWMLQLCCIEAHLKE-----NTAYFFQFSDVREAEELRKLQETLHRKYTCDR-SITVTRLEDLLQDAQDEKDQL  
WQRLEQAQEGYEEWLLNEIRRLERLEHLAEKFRQKASTHETWAYGKEQILLQ---KDYESASLTEVRALLRKHEAFESDL

Target  
4dle. 1. A NEYRGHLSGLAKRAKAIIVQLTPRNPTQPTRGRVPLLAVCDYKQVEATVHKGDECQMLGPAQPFHWKVLSSSGSEAAVPSV  
AAHQDRVEQIAAIAQELNELDY--H-D-----

Target  
4dle. 1. A CFLVPPPNQEALEAVARLEAQHQALVTLWHQLHTDMKSLLAW-----QSLSRDVQLIRSWSLVTFRTLKPEEQRQAL  
-----AVNVNDRCKKICDQWDRGLTLTQKRREALERMEKLETTIDQLHLEFAKRAAPFNNWME-----

Target  
4dle. 1. A RSLELHYQAFRLRDSQDAGGFGPEDRLQAEREYGSCSRHYQQLLSLEQGEQESRCRCISELKDIRLQLEACETRIVHR  
-----GAMEDLQDM

Target  
4dle. 1. A LRLPLDKEPARECAQRIAEQQAQAEVEGLGKGVARLSAEAEKVLALPEP-----SPAAPT LRSELETLGKLEQVRSLS  
F---IV-HSIEEIQSLITAHEQFKATLPEADGERQSIMAIQNEVEKVIQSYNIRISSNPYSTVTMDELRTKWDKVKQLV

Target  
4dle. 1. A AIYLEKLKTI-----SLVIRSTQGAEALRAHEEQKEAQAVPAALPELEATKAAMKKLRAQAEQQPVFDALR  
PIRDQSLQEELARQHANERLRRQFAAQANAIGPWIQNKMEETAR--SSIQITGALEDQMNQLKQYEHNIINYKNNIDKLE

Target  
4dle. 1. A DELRGAQEVGERLQQRHGERDVEVERWRERVQTLLEWRQAVLAQTDVRQRELEQLGRQLRYYRESADPLGAWLQDARRRQ  
-----GDHQLIQEALV---FDNKHTNYTMEHIRVGWELLTTIARTINEVETQILTRD-----

Target  
4dle. 1. A EQIQAVPLADSQAVREQLRQEKALLEEIERHAEKVEECQRFQKQYINAIKDYELQLVITYKAQLEPVASPAKKPKVQSGSE  
-----

Target  
4dle. 1. A SVIQEYVDLTRYSELSTLTSQYIRFISETLRRMEEERLAEQQRAEERERLAEVEAALEKQRQLAEHAQAKAQAEAREA  
-----

Target  
4dle. 1. A QELQRRMQEEVARREEVAVDAQQQKRSIQEELQQLRQSSEAEIQAKARQVEAAERSRLRIEEEIRVVRLQLETTERQGG  
-----

Target  
4dle. 1. A AEGELQALRARAEAEAQKRAQEEAERLRRQVQEETQKRQAEAEGLRVKAEAEAAAREKQALQALEELRLQAEAEER  
-----

Target  
4dle. 1. A RLRQAEAEARQVQVALETAQRSQAELQSKHASFAEKTAQLERTLEEEHVTVVQLREEATRREQQAEAEARAREEAERE  
-----

Target  
4dle. 1. A LERWQLKANEALRLRLQAE EVAQQSLAQAEAEKQKEAAEREARRRGKAEQAVRQRELAEQELERQRQLAEGTAQQRLA  
-----

Target  
4dle. 1. A AEQELIRLRAETEQGEQQRQLLEEELARLQSEAAAATQKRQELEAEAKVRAEMEVLLASKARAEESRSSEKSKRLE  
-----

Target  
4dle. 1. A AEAGRFRELAEEAARLALAEAEAKRQRQLAEEDAARQRAEAERVLSEKLAAISEATRLKTEAEIALKEKEAENERLRLA  
-----

Target  
4dle. 1. A EDEAFQRRRLEEQAQHKADIEERLAQLRKASESELERQKGLVEDTLRQRRQVEEELALKASFEEKAAAGKAELELELGR  
-----

Target  
4dle. 1. A IRGNAEDTLRSKEAQEAARQRQLAAEEERRRREAEERVQKSLAAEEEAARQKAAL EEVERLKAKVEEARRLRERAEH  
-----

Target  
4dle. 1. A ESVRQLQLAQEAQKRLQAEKHAFAVQQKEQELQQTLLQEQSVLEKL RSEAEFAARRAAEEAEARERAEREAAQSRQR  
-----

Target  
4dle. 1. A VEEAERLKQAAEEQAQAQAQAAAAEKLRKEAEQEAARRAQEAALRQKQAADAEMEKKHKKFAEQTLRQKAQVEQELTA  
-----

Target  
LRLKLEETDHQKSILDQELQRLKAEVTEAARQRSQVEEELFSVRVQMEELGKLRKARIEAENRALILRDKDNTQRLQEEA

4dle. 1. A -----  
Target EKMKQVAEEAARLSVAAQEAARLRQLAEEDLAQQRALAEKMLKEKMQAVQEATRLKAEAEELLQQQKELAQEQARRLQEDK  
4dle. 1. A -----  
Target EQMAQQLAQETQGFQRTLETERQRQLEMSAEAEERLRLVAEMSRAQARAEDAQRFRKQAEIIGAKLHRTELATQEKVTL  
4dle. 1. A -----  
Target VQTLETQRQQSDRDADRLREAIAELEREKDKLKKEAELLQLKSEEMQTVQQEQLLQETQALQQSFLSEKDSLLQRERFIE  
4dle. 1. A -----  
Target EEKAKLERLFQDEVAKAKLREEQQRQQQQMQQEKQQLLASMEEARRRQHEAEEGVRRKQEELQLEQQRQQQEQLLAAE  
4dle. 1. A -----  
Target NRRLRERLEHLEEEHRAALAHSEEITAAQAAATRALPNGQDAADGPAAEPEHAFEGLRQKVPAAQLQEAGILSTEELQRL  
4dle. 1. A -----  
Target AQGHTTVAELTQREDVRRYLQGHSSIAGLLLPANEKLTIIYAALRRQLSPGTALILLEAQAASGFLLDPVRNRRLTVTE  
4dle. 1. A -----  
Target AVKEGVVGPPELHHKLLSAERAVTGYKDPYTGEKISLQFQAMKDLIVREHGIRLLEAQIATGGVIDPVHSHRVPVDVAYHR  
4dle. 1. A -----  
Target GYFDEEMNRVLQDPSDDTKGFFDPNTHENLTYLQLLERCVEDPETGLRLLPLTDQAAKGELVYTDSEARDVFEKATVSA  
4dle. 1. A -----  
Target PFGKFQGKTVTIWELINSEYFTAQRRLLRQFRTGKVTVEKIIKIVITVIEEHEQKGLCFQGLRALVPAAELLESII  
4dle. 1. A -----  
Target DWDLFRQLQLGERSVQEVAEVEGVRRALRGSGVIAGVWLEEARQKLSIYEALKKELLQPEAAVALLEAQAGTGHVIDPAT  
4dle. 1. A -----  
Target SARLTVDEAVRAGLVGPPELHEKLLSAEKAVTGYKDPYSGQSVSLFQALKKGLIPREQGLRLLDAQLSTGGTVDPSPKSHRL  
4dle. 1. A -----  
Target PLDVACARGYLDEETSTALSAPRDDAKTYYPRTWELATYSQLQQCRPDPLTGLSLLPLSEEAARARQQELYSEVQARE  
4dle. 1. A -----  
Target AFQKATVEVPVGSFQGRAVTIWELINSEYFTAQRQELLRQFRTGKVTVEKIIKIVITVIEEVETTRRERLSFSGLRAPV  
4dle. 1. A -----  
Target PASELLAAGILSSSQFEQLKDGKTSVKDLSELSSLQTLQSGGCLAGIYLEESKEKVTIYEAMRRGLLRPSTAILLLEAQ  
4dle. 1. A -----  
Target AATGFLVDPVRNQRLVHEAVKAGVGPPELHEKLLSAEKAVTGYKDPYSGSTISLQFQAMKGLVVREHGIRLLEAQIATG  
4dle. 1. A -----  
Target GIIDPVHSHRVPVDVACQRGYFDEEMNRVLEDPSDDTKGFFDPNTHENLTYRQLLERCVEDPETGLRLLPLKGPEKAEV  
4dle. 1. A -----  
Target ETTRYVTEETTRAFEETQIDIPGGSGHGGSTMSLWEVMQSDLIPEEQRAQLMADFQAGRVTKERMIIIIIEIEIEKTEIV  
4dle. 1. A -----  
Target RQQNLASYDYVRRRLTAEDLYEARVISRESYSLLREGTRSLREVLEAESAWRYLYGTGCVAGVYLPGSRQTLPITYQALKK  
4dle. 1. A -----  
Target GLLSAEVARLLLEAQATGFLDPVKGERLTVDEAVRKGLVGPPELHDRLLSAERAVTGYRDPYTEQTISLQFQAMKDLIP  
4dle. 1. A -----  
Target AEEALRLDAQLATGGIVDPRLGFHLPLEVAYQRGYLNKDTHDQLSEPSEVRSYVDPSTDERLSYTLRLRCRRDETSGL  
4dle. 1. A -----  
Target FLLPLSEARKLTFRGLRKQITVEELVRSHVMDEATAQRLQEGLTSSIEEVSKNLQKFLEGTSSIAGVLVDATKERLSVYQA  
4dle. 1. A -----  
Target MKKGIIRPGTAFELLEAQATGYVIDPIKGLKLTVEEAVRMGIVGPEFKDKLLSAERAVTGYKDPYSGKLIISLQFQAMKKG  
4dle. 1. A -----  
Target LILKDHGIRLLEAQIATGGIIDPEESHRLPVDVAYQRGLFDEEMNEILTDPSDDTKGFFDPNTEENLTYLQLMERCVTDP  
4dle. 1. A -----  
Target QTGLRLLPLKEKKRERKTSKSSSVRKRVRVIVDPETGKEMSVYEAIRKGLIDHQTYLELSEQECEWEEITISSSDGVVKS  
4dle. 1. A -----



Target 4d1e. 1. A MIIDRRSGRQYDIDEAIAKSLIDRSALDQYRAGTLSITEFADMLSGNAGGFRSRSSSVGSSSSYPISPAVSRTQLASWSD

Target 4d1e. 1. A PTEETGPVAGILDTELEKVSITEAMHRNLVDNITGQRLLEAQAQCTGGIIDPNTGERFPVTDVAVNKGLVDKIMVDRINLA

Target 4d1e. 1. A QKAFCGFEDPRTKTKMSAAQALKKGWLYYEAGQRFLEVQYLTGGLIEPDTGPRVPLDEALQRGTVDARTAQKL RDVSAYS

Target 4d1e. 1. A KYLTCPKTKLKISYKDALDRSMVEEGTGLRLLLEAAAQSSKGYSPYSVSGSGSTGSRSGSRTGSRAGSRRGSFDTGSG

Target 4d1e. 1. A FSMTPSSSSYSSSGYGRRYASGPTSSLGGPESAAA

| Model #16                                                                         | File | Built with    | Oligo-State                   | Ligands | GMQE | QMEANDisCo Global |
|-----------------------------------------------------------------------------------|------|---------------|-------------------------------|---------|------|-------------------|
|  | PDB  | ProMod3 3.3.0 | monomer (matching prediction) | None    | 0.00 | 0.64 ± 0.05       |

| Template | Seq Identity | Oligo-state | QSQE | Found by | Method | Resolution | Seq Similarity | Range    | Coverage | Description                               |
|----------|--------------|-------------|------|----------|--------|------------|----------------|----------|----------|-------------------------------------------|
| 6s12.1.A | 29.82        | homo-dimer  | 0.00 | HHblits  | X-ray  | 3.10Å      | 0.36           | 62 - 448 | 0.08     | Calponin homology domain protein putative |

Excluded ligands

| Ligand Name.Number | Reason for Exclusion        | Description                              |
|--------------------|-----------------------------|------------------------------------------|
| CA.1               | Binding site not conserved. | CALCIUM ION                              |
| CA.4               | Binding site not conserved. | CALCIUM ION                              |
| MG.2               | Not in contact with model.  | MAGNESIUM ION                            |
| MG.5               | Not in contact with model.  | MAGNESIUM ION                            |
| TRS.3              | Not biologically relevant.  | 2-AMINO-2-HYDROXYMETHYL-PROPANE-1,3-DIOL |
| TRS.6              | Not biologically relevant.  | 2-AMINO-2-HYDROXYMETHYL-PROPANE-1,3-DIOL |

Target 6s12. 1. A MSGEDQEVRAVVEDGSNGGSGSPSPGDTLPWNLEKTQRSRRGGGGPGNGSVLDPAERAVIRIADERDRVQKKTFTKWVN  
-----ELVAQWEKVQIKTFTKWVN

Target 6s12. 1. A KHLIKAQRHISDLYEDLRDGHNLISLLEVLSGDSLPR-EKGRMRFHKLQNVQIALDYLRRHQVKLVNIRNDDIADGNPKL  
MHLAKKGRKINDVTDFKNGVELCALLEIIGETTICKVTNPKMRIQMTENLDKALRFIQSRDVKL TGIGPTDIVDGNVKL

Target 6s12. 1. A TLGLIWTIILHFQISDIQVSGQSEDMTAKEKLLWSQRMVEGYQGLRCDNFTSSWRDGRLFNAIIHRHKPMLIDMNKVYR  
TLGLVWTLILRFATISELSAE----GLSAKQGLLLWCQKKCEPYP-VKVENFSESFKDGKVFCALIHRRHPDLLDWETVGE

Target 6s12. 1. A QTNLENLDQAFSVAERDLGVTRLLDPEDVDV-PQPDEKSIITYVSSLYDAMPVPDVQDGVK-----ANELQLRWQE  
D-DRANLEKAFDVAEKELGIPKLLDVDDIVNMPRPDERSVMTYVAALYKVFSSNDQVEKAGKRAGNFLDLLRATEGMVHD

Target 6s12. 1. A YRELVLILLQWIRAHTAAFEERRFPSSFEEIEILWCQFLKFKETELPAKEADKNRSGIYQSLEGAVQAG---QLKVPPG  
YEQRAQALKENIEAAINKMNGVEPSDEYHQVEQINETKNYRKGDKRAFIKEQGDLATLFGQINSKLGRMKRPVYVAPEG

Target 6s12. 1. A YHPLDVEKEWGKLVHAILEREKQLRSEFERLERLQRIVSKLQMEAGLCEEQLNQADALLQSDVRLLAAGKAPQRAGEVER  
LDPKSLEGYIANISEAERALRSKLN TAMR--NCLIALRKAFADPANATDAKINEYRTFVTD-----

Target 6s12. 1. A DLDKADGMIRLLFNDVQALKDGRHPQGEQMYRRVYRLHERLVAIRTEYNLRLRGTPRHPELEDSTLRYLQDLLAWVEENQ  
-----

Target 6s12. 1. A RRVDSAEWGVDLPVSAQLGSHRGLHQSVVEEFRAKIERARTDEGQLSPATRGAYRDCLGRDLQYAKLLNSSKARLSLE  
-----

Target 6s12. 1. A SLHGFVAAATKELMWLSEKEEEEVGFWDSESNSMAAKKEAYSALMRELELKEKKIKEIQSTGDRLLREDHPARPTVESF  
-----

Target 6s12. 1. A QAALQTQWSWMLQLCCCEIAHLKENTAYFQFFSDVREAEQRLKQLQETLHRKYTCDRSITVTRLEDLLQDAQDEKDLNE  
-----

|                      |                                                                                            |
|----------------------|--------------------------------------------------------------------------------------------|
| Target<br>6s12. 1. A | YRGHLSGLAKRAKAIVQLTPRNPTQPTRGRVPLLAVCDYKQVEATVHKGDECQMLGPAQPFHWKVLSSSGSEAAVPSVCF<br>-----  |
| Target<br>6s12. 1. A | LVPPPNQEALEAVARLEAQHQALVTLWHQLHTDMKSLLAWQSLSRDVQLIRSWSLVTFTLKPEEQRQALRSLELHYQAF<br>-----   |
| Target<br>6s12. 1. A | LRDSQDAGGFGPEDRLQAEREYGSCSRHYQQLQSLEQGEQEESRCQRCISELKDIRLQLEACETRTRVHRLRLPLDKEPA<br>-----  |
| Target<br>6s12. 1. A | RECAQRIAEQKKAQAEVEGLGKGVARLSAEAEKVLALPEPSPAAPTLRSELELTGKLEQVRSLSAIYLEKLTISLVIR<br>-----    |
| Target<br>6s12. 1. A | STQGAEELRAHEEQLKEAQAVPAALPELEATKAAMKKLRAQAEAAQPVFDALRDELGAQEVGERLQQRHGERDVEVER<br>-----    |
| Target<br>6s12. 1. A | WRERTQLLERWQAVLAQTDVRQRELEQLGRQLRYRESADPLGAWLQDARRRQEQIQAVPLADSQAVREQLRQEKALLE<br>-----    |
| Target<br>6s12. 1. A | EIERHAEKVEECQRFQAKQYINAIKDYELQLVTYKAQLEPVASPAKKPKVQSGSESVIQEYVDLRTRYSELSTLTSQYIRF<br>----- |
| Target<br>6s12. 1. A | ISETLRRMEEERLAEQQRAEERERLAEVEAALEKQRQLAEAHQAQAQAEAEQELQRRMQEEVARREEVAVDAQQQR<br>-----      |
| Target<br>6s12. 1. A | SIQEELQQLRQSSEAEIQAKARQVEAAERSRLRIEEIIRVVRLQLETTERQRGGAEGELQALRARAEAEAKRQAQEEA<br>-----    |
| Target<br>6s12. 1. A | ERLRRQVQEETQRKRQAEELGLRVKAEAAAREKQRALQALEELRLQAEAAERRLRQAEARARQVQVALETAQRSQA<br>-----      |
| Target<br>6s12. 1. A | ELQSKHASFAEKTAQLERTLEEEHVTVVQLREEATREQQQAEERAREEAERELERWQLKANEALRLRLQAE EVAQQKS<br>-----   |
| Target<br>6s12. 1. A | LAQAEAEKQKEAAEREARRRGKAEQAVRQRELAQEQLERQRQLAEGTAQQLAAEQELIRLRAETEQGEQQRQLLEEL<br>-----     |
| Target<br>6s12. 1. A | ARLQSEAAAAATQKRQELEAELAKVRAEMEVLLASKARAEESRSSEKSKRLEAEAGRFRELAEEAARLRALAEAAKRQ<br>-----    |
| Target<br>6s12. 1. A | RQLAEEDAARQRAEAERVLSEKLAAISEATRLKTEAEIALKEKEAENERLRLAEDEAFQRRRLEEQAQHKADIEERLA<br>-----    |
| Target<br>6s12. 1. A | QLRKASESELERQKGLVEDTLRQRRQVEEELALKASFKAAGKAELELELGRIRGNAEDTLRSKEQAEQEAARQRQLA<br>-----     |
| Target<br>6s12. 1. A | AEERRRRREAEERVQKSLAEEEEARQRKAALEEVERLKAKVEEARRLRERAEHESVRQLQLAQEAAQKRLQAEKHAHF<br>-----    |
| Target<br>6s12. 1. A | AVQQKEQELQQTLLQEQSVLEKLRSSEAAARRAAEEAEARERAEREAAQSRQRVEEAERLKQAAEEQAQAQAQAAAAE<br>-----    |
| Target<br>6s12. 1. A | KLRKEAEQEAARRAQAEQAALRQKQAADAEMEKHKKFAEQTLRQKAQVEQELTALRLKLEETDHQKSILDQELQRLKAEV<br>-----  |
| Target<br>6s12. 1. A | TEAARQRSQVEEELFSVRVQMEELGKLKARIEAENRALILRDKDNTQRLLQEEAEKMKQVAEEAARLSVAQEAARLRQL<br>-----   |
| Target<br>6s12. 1. A | AEEDLAQQRALAEKMLKEKMQAVQEATRLKAEALLQQQKELAQEQARRLQEDKEQMAQQLAQETQGFQRTLETERQRQL<br>-----   |
| Target<br>6s12. 1. A | EMSAEAEERLRLVAEMSRAQARAEDAQRFRKQAEELGAKLHRTTELATQEKVTLVQTLETQRQQSDRDADRLREIAELE<br>-----   |
| Target<br>6s12. 1. A | REKDKLKKEAELLQLKSEEMQTVQQEQLLQETQALQQSFLSEKDSLLQRRERFIEEEKAKLERLFQDEVAKAQLREEQQR<br>-----  |
| Target<br>6s12. 1. A | QQQQMQQEKQQLLASMEEAARRRQHEAEEGVRRKQEELQLLEQQRQQQEQLLAENRRRLRERLEHLEEEHRAALAHSEEIT<br>----- |
| Target<br>6s12. 1. A | AAQAAATRALPNGQDAADGPAEPEHAFEGLRQKVPAAQLQEAGILSTEELQRLAQGHTTVAELTQREDVRRYLQGHSSI<br>-----   |
| Target               | AGLLKPAN EKLTIIYAALRRQLLSPGTALILLEAQ AASGFLDPVRNRRLTVTEAVKEGVGP ELP HHLKLSAERAVTGYK        |

6s12. 1. A -----

TargetDPYTGEKISLFFQAMKKDLIVREHGIRLLEAQIATGGVIDPVHSHRVPVDVAYHRGYFDEEMNRVLQDPSDDTKGFFDPNT

6s12. 1. A -----

TargetHENLTYLQLLERCVDPETGLRLLPLTDQAAKGGLVYTDSEARDVFEKATVSAPFGKFQGKTVTIWELINSEYFTAQR

6s12. 1. A -----

TargetRDLLRQFRTGKVTVEKIIKIVITVIEEHEQKGLCFQGLRALVPAELLESGLIDWDLFRQLQLGERSVQVEAEVEGVRR

6s12. 1. A -----

TargetALRGSGVIAGVWLEEARQKLSIYEALKKELLQPEAAVALLEAQAGTGHVIDPAT SARLTVDEAVRAGLVGPELHEKLLSA

6s12. 1. A -----

TargetEKAVTGYKDPYSGQSVSLFQALKKGLIPREQGLRLLDAQLSTGGTVDP SKSHRLPLDVACARGYLDEETSTALSAPRDDA

6s12. 1. A -----

TargetKTYYPRTWELATYSQLQQCRPDPLTGLSLLPLSEEAARARQQELYSEVQAREAFQKATVEVPVGSFQGRAVTIWELIN

6s12. 1. A -----

TargetSEYFTAQRQELLRQFRTGKVTVEKIIKIVITIVEEVETTRRERLSFSGLRAPVPASELLAAGILSSSQFEQLKDGTSTV

6s12. 1. A -----

TargetKDLSELSSLQTLQGGGCLAGIYLESKEKVTIYEAMRRGLLRPSTAILLLEAQAA TGFLVDPVRNQRLYVHEAVKAGV

6s12. 1. A -----

TargetGPHELHEKLLSAEKAVTGYKDPYSGSTISLFFQAMKKGLVVREHGIRLLEAQIATGGIIDPVHSHRVPVDVACQRGYFDEEM

6s12. 1. A -----

TargetNRVLEDPDDTKGFFDPNTHENLTYRQLLERCVDPETGLRLLPLKGPEKA EVVETTRVYTEEETRRAFEETQIDIPGGG

6s12. 1. A -----

TargetSHGGSTMSLWEVMQSDLIPEEQRAQLMADFQAGRVTKERMIIIIIEIEKTEIVRQQNLASYDYVRRRLTAEDLYEARVI

6s12. 1. A -----

TargetSRESYSLLREGTRSLREVLEAESAWRYLYGTGCVAGVYLPGSRQTLPIYQALKKGLLSAEVARLLLEAQAA TGFLDPVK

6s12. 1. A -----

TargetGERLTVDEAVRKGLVGPELHRLLSAERAVTGYRDPYTEQTISLFFQAMKKDLIPAEALRLLDAQLATGGIVDPRLGFHL

6s12. 1. A -----

TargetPLEVAYQRGYLNKDTHDQLSEPSEVRSYVDPSTDERLSYQLLRRCRRETSGLFLLPLSEARKLTFRGLRKQITVEELV

6s12. 1. A -----

TargetRSHVMDEATAQRLQEGLTSIEEVSKNLQKFLEGTSSIAGVLVDATKERLSVYQAMKKGIIRPGTAFELLEAQAA TGVID

6s12. 1. A -----

TargetPIKGLKLTVEEAVRMGIVGPEFKDKLLSAERAVTGYKDPYSGKLISLFFQAMKKGLILKDHGIRLLEAQIATGGIIDPEES

6s12. 1. A -----

TargetHRLPVDVAYQRLFDEEMNEILTDPSDDTKGFFDPNTEENLTYLQLMERCVTDPQTGLRLLPLKEKKRERKTSSKSSVRK

6s12. 1. A -----

TargetRRVIVDPETGKEMSVYEA YRKGLIDHQTYLELSEQECWEIEITISSDGVVKSMIIDRRSGRQYDIDEAIAKSLIDRSA

6s12. 1. A -----

TargetLDQYRAGTLSITEFADMLSGNAGGFRSRSSSVGSSSYPISPA VSRTQLASWSDPTEETGPVAGILD TETLEKVSITEAM

6s12. 1. A -----

TargetHRNLVDNITGQRLLEAQACTGGIIDPNTGERFPVTD AVNKGLVDKIMVDRINLAQKAFCGFEDPRTKTKMSAAQALKKGW

6s12. 1. A -----

TargetLYYEAGQRFLEVQYLTGGLIEPDTPGRVPLDEALQRGTVDARTAKLRDVSAYS KYLTCPKTKLKISYKDALDRSMVEEG

6s12. 1. A -----

TargetTGLRLLLEAAQSSKGYSPYSVSGSGSTGSRSGSRTGSRAGSRRGSF DATGSGFSMTFSSSSYSSSGYGRRYASGPTSS

6s12. 1. A -----

TargetLGGPESAAA

6s12. 1. A -----

| Model #11                                                                         | File | Built with    | Oligo-State | Ligands | GMQE | QMEANDisCo Global |
|-----------------------------------------------------------------------------------|------|---------------|-------------|---------|------|-------------------|
| 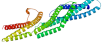 | PDB  | ProMod3 3.3.0 | monomer     | None    | 0.00 | 0.69 ± 0.05       |

| Template | Seq Identity | Oligo-state | QSQE | Found by | Method | Resolution | Seq Similarity | Range      | Coverage | Description |
|----------|--------------|-------------|------|----------|--------|------------|----------------|------------|----------|-------------|
| 5j1i.1.A | 96.47        | monomer     | 0.00 | HHblits  | X-ray  | 2.80Å      | 0.59           | 991 - 1351 | 0.08     | Plectin     |

The template contained no ligands.

Target 5j1i.1.A MSGEDQEVRAVVEDGSNGGSGSPSPGDTLPWNLEKTQSRRRGGGPGNGSVLDPATERAVIRIADERDRVQKKTFTKWVN

Target 5j1i.1.A KHLIKAQRHISDLYEDLRDGHNLISLLEVLSGDSLPREKGRMRFHKLQNVQIALDYLHRHQVKLVNIRNDDIADGNPKLT

Target 5j1i.1.A LGLIWTIILHFQISDIQVSGQSEDMTAKEKLLWSQRMVEGYQGLRCDNFTSSWRDGRLFNAIIHRHKPMLIDMNKVYRQ

Target 5j1i.1.A TNLENLDQAFSVAERDLGVTRLLDPEDVDVPQDEKSIITYVSSLYDAMPRPVDVQDGVKANELQLRWQEYRELVLVLLQ

Target 5j1i.1.A WIRAHTAAFEERRFPSSFEEIEILWCQFLKFKETELPAKEADKNRSKGIYQSLEGAVQAGQLKVPVPGYHPLDVEKEWGKL

Target 5j1i.1.A HVAILEREKQLRSEFERLERLQRIVSKLQMEAGLCEEQLNQADALLQSDVRLLAAGKAPQRAGEVERDLKADGMIRLLF

Target 5j1i.1.A NDVQALKDGRHPQGEQMYRRVYRLHERLVAIRTEYNLRLRGTPRHPELEDSTLRYLQDLLAWVEENQRRVDSAEGVDDL

Target 5j1i.1.A SVEAQLGSHRGLHQSVEEFRAKIERARTDEGQLSPATRGAYRDCLGRDLQYAKLLNSSKARLSLES LHGFVAAATKEL

Target 5j1i.1.A MWLSEKEEEVGFWDWERNNSMAAKKEAYSALMRELELKEKKIKEIQSTGDRLLREDHPARPTVESFQAALQTQSWMLQ

Target 5j1i.1.A LCCCIEAHLKENTAYFQFFSDVREAEELRKLQETLHRKYTCDRSITVTRLEDLLQDAQDEKDQLNEYRGHLSGLAKRAK

Target 5j1i.1.A AIVQLTPRNPTQPTRGRVPLLAVCDYKVEATVHKGDECQMLGPAQPFHWKVLSSSGSEAAVPSVCFLVPPPNQEALEAV

Target 5j1i.1.A ARLEAQHQALVTLWHQLHTDMKSLLAWSLRDVLIRWSLVTFRTLKPEEQRQALRSLELHYQAFRLDSQDAGGFGPE

Target 5j1i.1.A DRLQAEREYGSCSRHYQQLLSLEQGEQEESRCQRCISELKDIRLQLEACETRTRVHRLRLPLDKEPARECAQRIAEQQA  
-----QEESRCQRCISELKDIRLQLEACETRTRVHRLRLPLDKEPARECAQRIAEQQA

Target 5j1i.1.A QAEVEGLGKGVARLSAEAEKVLALPEPSAAPTTLRSELELTGKLEQVRSLSAIYLEKLKLTISLVIRSTQGAEELRAHE  
QAEVEGLGKGVARLSAEAEKVLALPEPSAAPTTLRSELELTGKLEQVRSLSAIYLEKLKLTISLVIRGTQGAEEVLRAHE

Target 5j1i.1.A EQLKEAQAVPAALPELEATKAAMKKLRAQAEAAQPVFDALRDELGAQEVGERLQQRHGERDVEVERWRRVTQLLERWQ  
EQLKEAQAVPATLPELEATKASLKKLRAQAEAAQPTFDALRDELGAQEVGERLQQRHGERDVEVERWRRVAQLLERWQ

Target 5j1i.1.A AVLAQTDVQRLEQLGRQLRYYRESADPLGAWLQDARRRQEIQAVPLADSQAVREQLRQEKALLEEIERHAEKVEECQ  
AVLAQTDVQRLEQLGRQLRYYRESADPLGAWLQDARRRQEIQAMPLADSQAVREQLRQEKALLEEIERHGEKVEECQ

Target 5j1i.1.A RFAKYINAIKDYLQLVITYKAQLEPVASPAKKPKVQSGSESVIQEYVDLRTYSELSTLTSQYIRFISSETLRRMEEER  
RFAKYINAIKDYLQLVITYKAQLEPVASPAKKPKVQSGSESVIQEYVDLRTYSELSTLTSQYIKFISSETLRRM-----

Target 5j1i.1.A LAEQQRAEERERLAEVEAALEKQRLAEAHQAQAQAEAAQELQRRMQEEVARREEVAVDAQQKRSIQEELQQLRQSS

Target 5j1i.1.A EAEIQAKARQVEAAERSRLRIEEIIRVVRLQLETTERQRGGAEGELQALRAREEAEAKRQAQEEAERLRRVQEETQR

|                    |                                                                                            |
|--------------------|--------------------------------------------------------------------------------------------|
| Target<br>5jli.1.A | KRQAEAEGLRVKAEAEAREKQRALQALEELRLQAEAEERRLRQAEAEERARQVQVALETAQRSQAELQSKHASFAEKT<br>-----    |
| Target<br>5jli.1.A | AQLERTLEEEHVTVVQLREEATRREQQAEAEERAREEAERELERWQLKANEALRLRLQAE EVAQQKSLAQAEAEKQKEAA<br>----- |
| Target<br>5jli.1.A | EREARRRGKAEEQAVRQRELAEQELERQRQLAEGTAQQRLAAEQELIRLRAETEQGEQQRQLLEEELARLQSEAAAAATQK<br>----- |
| Target<br>5jli.1.A | RQELEAELAKVRAEMEVLLASKARAEESRSSESKQRLEAEAGRFRELAEEAARLRALAEAAKRQRQLAEEDAARQRA<br>-----     |
| Target<br>5jli.1.A | EAERVLSEKLAAISEATRLKTEAEIALKEKEAENERLRLLAEDEAFQRRRLEEQAQHKADIEERLAQLRKASESELERQ<br>-----   |
| Target<br>5jli.1.A | KGLVEDTLRQRRQVEEELALKASFEEAAAGKAELELELGRIRGNAEDTLRSKEQAEQEAARQRQLAAEEERRRREAEEER<br>-----  |
| Target<br>5jli.1.A | VQKSLAEEEEAARQRKAAL EEVERLKAKVEEARRLRERAEHESVRQLQLAQEAAQKRLQAE EKAHAFVQQKEQELQQTL<br>----- |
| Target<br>5jli.1.A | QQEQSVLEKL RSEAEAAARRAAEEAEARERAEERAAQSRQRVEEAERLKQAAEEQAQAQAQAAAAEKL RKEAEQEAARR<br>----- |
| Target<br>5jli.1.A | AQAEQAALRQKQAADAEMEKHKFAEQTLRQKAQVEQELTALRLKLEETHQKSILDQELQRLKAEVTEAARQRSQVEEE<br>-----    |
| Target<br>5jli.1.A | LFSVRVQMEELGKLKARIEAENRALILRDKDNTQRLQEEAEKMKQVAEEAARLSVAAQEAARLRQLAEEDLAQQRALAE<br>-----   |
| Target<br>5jli.1.A | KMLKEKMQAVQEATRLKAEAEELLQQQKELAQEQARRLQEDKEQMAQQLAQETQGFQRTLETERQRQLEMSAEERLRLRV<br>-----  |
| Target<br>5jli.1.A | AEMSRAQARAEEDAQRFRKQAEETGAKLHRTELATQEKVTLVQTLETQRQQSDRDADRLREATAELEREKDKLKKEAELL<br>-----  |
| Target<br>5jli.1.A | QLKSEEMQTVQQEQLLQETQALQQSFLSEKDSLLQRERFIEEEKAKLERLFQDEVAKAQLREEQQRQQQQMQQEKQQLL<br>-----   |
| Target<br>5jli.1.A | ASMEEARRRQHEAEEGVRRKQEELQLLEQQRQQQEQLLAENRRLRERLEHLEEEHRAALAHSEEITAAQAAATRALPNG<br>-----   |
| Target<br>5jli.1.A | QDAADGPAAEPEHAFEGLRQKVPAAQLQEAGILSTEELQRLAQGHTTVAELTQREDVRRYLQGHSSIAGLLLKPANEKLT<br>-----  |
| Target<br>5jli.1.A | IYAALRRQLLSPGTALILLEAQAASGFLDPVRNRRLTVTEAVKEGVVGPPELHHKLLSAERAVTGYKDPYTGEKISL FQA<br>----- |
| Target<br>5jli.1.A | MKKDLIVREHGIRLLEAQIATGGVIDPVHSHRVPVDVAYHRGYFDEEMNRVLQDPSDDTKGFFDPNTHENLTYLQLLERC<br>-----  |
| Target<br>5jli.1.A | VEDPETGLRLLPLTDQAAKGGEVYTDSEARDVFEKATVSAPFGKFQGKTVTIWELINSEYFTA EQRRDLLRQFRTGKVT<br>-----  |
| Target<br>5jli.1.A | VEKIIKIVITVIEEHEQKQLCFQGLRALVPAAELLESGLIDWDLFRQLQLGERSVQEVAEVEGVRRALRGSGVIAGVWL<br>-----   |
| Target<br>5jli.1.A | EEARQKLSIYEALKKELLQPEAAVALLEAQAGTGHVDPATSARLTVDEAVRAGLVGPPELHEKLLSAEKAVTGYKDPYSG<br>-----  |
| Target<br>5jli.1.A | QSVSLFQALKKGLIPREQGLRLDLAQLSTGGTVDPKSHRPLDVCARGYLDEETSTALSAPRDDAKTYYPDPTWELAT<br>-----     |
| Target<br>5jli.1.A | YSQLQQCRPDPLTGLSLLPLSEEAARARQQELYSEVQAREAFQKATVEVPVGSFQGRAVTIWELINSEYFTA EQRQELL<br>-----  |
| Target<br>5jli.1.A | RQFRTGKVTVEKIIKIVITIVEEVETTRRERLSFSGLRAPVPASELLAAGILSSSQFEQLKD GKTSVKDLSELSSLQTLL<br>----- |
| Target<br>5jli.1.A | QGGGCLAGIYLESKEKVTIYEAMRRGLLRPSTAILLEAQAAATGFLVDPVRNQRLYVHEAVKAGVVGPPELHEKLLSAEK<br>-----  |
| Target             | AVTGYKDPYSGSTISL FQAMKKGLVVREHGIRLLEAQIATGGIDPVHSHRVPVDVACQRGYFDEEMNRVLEDPSDDTKG<br>-----  |

5jli.1.A -----  
Target FFDPNTHENLTyrQLLERCVEDPETGLRLLPLKGPEKAEEVETTRVYTEEETRRAFEETQIDIPGGGSHGGSTMSLWEVM  
5jli.1.A -----  
Target QSDLIPEEQRAQLMADFQAGRVTKERMI I I I I E I IEKTEIVRQQNLASYDYVRRRLTAEDLYEARVISRESYSLLREGTR  
5jli.1.A -----  
Target SLREVLEAESAWRYLYGTGCVAGVYLPGSRQTLPIYQALKKGLLSAEVARLLLEAQAATGFLDPVKGERLTVDEAVRK  
5jli.1.A -----  
Target LVGPELHDRLLSAERAVTGYRDPYTEQTISL FQAMKKDLIPAEELRLDAQLATGGIVDPRLGFHLPLEVAYQRGYLNK  
5jli.1.A -----  
Target DTHDQLSEPSEVRSYVDPSTDERLSYTQLLRRCRRDETSGLFLLPLSEARKLTFRGLRKQITVEELVRSHVMDEATAQRL  
5jli.1.A -----  
Target QEGLTSIEEVSKNLQKFLEGTSSIAGVLVDATKERLSVYQAMKGIIRPGTAFELLEAQAATGYVIDPIKGLKLTVEEAV  
5jli.1.A -----  
Target RMGIVGPEFKDLLSAERAVTGYKDPYSGKLISL FQAMKGLILKDHGIRLLEAQIATGGIIDPEESHRLPVDVAYQRL  
5jli.1.A -----  
Target FDEEMNEILTDP SDDTKGFFDPNTEENLTYLQLMERCVTDPQTGLRLLPLKEKKRERKTSSKSSVRKRRVIVDPETGKE  
5jli.1.A -----  
Target MSVYEAYRKGLIDHQTYLELSEQECEWEEITISSSDGVVKSMIIDRRSGRQYDIDEAIAKSLIDRSALDQYRAGTLSITE  
5jli.1.A -----  
Target FADMLSGNAGGFRSRSSSVGSSSSYPISPAVSRTQLASWSDPTEETGPVAGILD TETLEKVSITEAMHRNLVDNITGQRL  
5jli.1.A -----  
Target LEAQA CTGGIIDPNTGERFPVTD AVNKGLVDKIMVDRINLAQKAF CGFEDPRTKTKMSAAQALKKGWLYYEAGQRFLEVQ  
5jli.1.A -----  
Target YLTGGLIEPDT PGRVPLDEALQRGTVDARTAKLRDVSAYS KYLTC PKTKL KISYKDALDRSMVEEGTGLRLLEAAQSS  
5jli.1.A -----  
Target KGYSPYSVSGSGSTTGSRSRTGSRAGSRRGSF DATGSGFSMTFSSSSYSSSGYGRRYASGPTSSLG GPESAAA  
5jli.1.A -----

| Model #04                                                                           | File | Built with    | Oligo-State | Ligands | GMQE | QMEANDisCo Global |
|-------------------------------------------------------------------------------------|------|---------------|-------------|---------|------|-------------------|
|  | PDB  | ProMod3 3.3.0 | monomer     | None    | 0.00 | 0.65 ± 0.05       |

| Template | Seq Identity | Oligo-state | QSQE | Found by | Method | Resolution | Seq Similarity | Range       | Coverage | Description |
|----------|--------------|-------------|------|----------|--------|------------|----------------|-------------|----------|-------------|
| 5dzz.1.A | 54.12        | monomer     | 0.00 | HHblits  | X-ray  | 2.60Å      | 0.45           | 2977 - 3553 | 0.11     | Desmoplakin |

The template contained no ligands.

Target MSGEDQEVRAVEDGSNGSGSPSGDTLPWNLEKTQRSRRGGGGPGNGSVLDP AERAVIRIADERDRVQKKTFTKWVN  
5dzz.1.A -----  
Target KHLIKAQRHISDLYEDLRDGHNLISLLEVLSGDSLPREKGRMRFHKLQNVQIALDYLRHRQVKLVNIRNDDIADGNPKLT  
5dzz.1.A -----  
Target LGLIWTIILHFQISDIQVSGQSEDMTAKEKLLWSQRMVEGYQGLRCDNFTSSWRDGRLFNAI IHRHKPMLIDMNKVYRQ  
5dzz.1.A -----  
Target TNLENLDQAFSVAERDLGVTRLLDPEDVDVPQ PDEKSIITYVSSLYDAMP RVPDVQDGVKANELQLRWQEYREL VLLLLQ  
5dzz.1.A -----  
Target WIRAHTAAFEERRFPSSFEEIEILWCQFLKFKETELPAKEADKNRSKGIYQSLEGAVQAGQLKVP PGYHPLDVEKEWGKL

5dzz. 1. A -----  
Target HVAILEREKQLRSEFERLERLQRIVSKLQMEAGLCEEQLNQADALLQSDVRLLAAGKAPQRAGEVERDLKADGMIRLLF  
5dzz. 1. A -----  
Target NDVQALKDGRHPQGEQMYRRVYRLHERLVAIRTEYNLRLRGTPRHPELEDSTLRYLQDLLAWVEENQRRVDSAEWGVDLP  
5dzz. 1. A -----  
Target SVEAQLGSHRGLHQSVEEFRAKIERARTDEGQLSPATRGAYRDCLGRDLQYAKLLNSSKARLSLESLHGFVAAATKEL  
5dzz. 1. A -----  
Target MWLSEKEEEEVGFWDWSEKSNMAAKKEAYSALMRELELKEKKIKEIQSTGDRLLREDHPPARPTVESFQAALQTQWSWMLQ  
5dzz. 1. A -----  
Target LCCCIEAHLKENTAYFQFFSDVREAEELRKLQETLHRKYTCDRSITVTRLEDLLQDAQDEKQQLNEYRGHLSGLAKRAK  
5dzz. 1. A -----  
Target AIVQLTPRNPTQPTRGRVPLLAVCDYKQVEATVHKGDECQMLGPAQPPHVKVLSSSGSEAAVPSVCFLVPPPNQEALEAV  
5dzz. 1. A -----  
Target ARLEAQHQALVTLWHQLHTDMKSLLAWSLSRDVQLIRWSLVTFRTLKPEEQRQALRSLELHYQAFLRDSQDAGGFGPE  
5dzz. 1. A -----  
Target DRLQAEREYGSCSRHYQQLLSLEQGEQEESRCQRCISELKDIRLQLEACETRIVHRLRLPLDKEPARECAQRIAEQQKA  
5dzz. 1. A -----  
Target QAEVEGLGKGVARLSAEAEKVLALPEPSPAAPTLRSELELTGKLEQVRSLSAIYLEKLKTIISLVIRSTQGAEELRAHE  
5dzz. 1. A -----  
Target EQLKEAQAVPAALPELEATKAAMKKLRAQAEAAQPVFDALRDELGAQEVGERLQQRHGERDVEVERWRERVTLLELRWQ  
5dzz. 1. A -----  
Target AVLAQTDVRQRELEQLGRQLRYRESADPLGAWLQDARRRQEIQAVPLADSQAVREQLRQEKALLEIERHAEKVEECQ  
5dzz. 1. A -----  
Target RFAKQYINAIKDYLQLVITYKAQLEPVASPAKKPKVQSGSESVIQEYVDLRTRYSELSTLTSQYIRFISETLRRMEEEER  
5dzz. 1. A -----  
Target LAEQQRAEERERLAEVEAALEKQRQLAEHAQAKAQAEAEQELQRRMQEEVARREEVAVDAQQQKRSIQEELQQLRQSS  
5dzz. 1. A -----  
Target EAEIQAQARQVEAAERSRLRIEEEIRVVRLQLETTERQRGGAEGELQALRAREEAEAKRQAQEEAERLRRQVQEETQR  
5dzz. 1. A -----  
Target KRQAEELGLRVKAEAEAREKQRALQALEELRLQAEAAERRLRQAEAEARARQVQVALETAQRSAQELQSKHASFAEKT  
5dzz. 1. A -----  
Target AQLERTLEEEHVTVVQLREEATRREQQAEEAERAREEAERELERWQLKANEALRLRLQAE EVAQQKSLAQAEAEKQKEAA  
5dzz. 1. A -----  
Target EREARRRGKAEQAVRQRELAEQELERQRLAEGTAQQLAAEQELIRLRAETEQGEQQRQLLEEELARLQSEAAAAATQK  
5dzz. 1. A -----  
Target RQELEAELAKVRAEMEVLLASKARAEESRSSEKSKRLEAEAGRFRELAEEAARLRALAEAAKRQRQLAEEDAARQRA  
5dzz. 1. A -----  
Target EAERVLSEKLA AIS EATRLKTEAEIALKEKEAENERLRLRAEDEAFQRRRLEEQAQHKADIEERLAQLRKASESELERQ  
5dzz. 1. A -----  
Target KGLVEDTLRQRRQVEEELALKASFEEKAAAGKAELELELGRIRGNAEDTLRSKEQAEQEAARQRQLAAEEERRRREAER  
5dzz. 1. A -----  
Target VQKSLAEEEEAARQRKAAL EEVERLKAKVEEARRLRERAEHESVRQLQLAQEAQKRLQAEKHAFAVQQKEQELQOTL  
5dzz. 1. A -----  
Target QQEQSVLEKLRSEAEAAARRAAEEAEERARAEREAQSRQRVEEAERLKQAAEEQAQAQAQAAAEKLRKEAEQEAARR  
5dzz. 1. A -----  
Target AQAEQAALRQKQAADAEMEKHKFAEQTLRQKAQVEQELTALRLKEETDHQKSILDQELQRLKAEVTEAARQRSQVEEE  
5dzz. 1. A -----  
Target LFSVRVQMEELGKLKARIEAENRALILRDKDNTQRLLQEEAEKMKQVAEEAARLSVAQAQAARLRQLAEEDLAQQRALAE  
5dzz. 1. A -----

Target 5dzz. 1. A KMLKEKMQAVQEATRLKAEAEELLQQQKELAQEQARRLQEDKEQMAQQLAQETQGFQRTLETERQRQLEMSAEAERLRLRV-----

Target 5dzz. 1. A AEMSRAQARAEEDAQRFKQAEIEGAKLHRTTELATQEKVTLVQTLETQRQQSDRDADRLREATAELEREKDKLKKEAEELL-----

Target 5dzz. 1. A QLKSEEMQTVQQEQLLQETQALQQSFLSEKDSLLQRRERFIEEEKAKLERLFQDEVAKAQKLREEQQRQQQQMQQEKQQL-----

Target 5dzz. 1. A ASMEEARRRQHEAEEGVRRKQEELQLLEQQRQQQEQLLAEENRRLRERLEHLEEEHRAALAHSEEITAAQAAATRALPNG-----

Target 5dzz. 1. A QDAADGPAAEPEHAFEGLRQKVPAAQLQEAGILSTEELQRLAQGHTTVAELTQREDVRRYLQGHSSIAGLLLPANEKLT-----

Target 5dzz. 1. A IYAALRRQLLSPGTALILLEAQAASGFLDPVRNRRLTVTEAVKEGVVGPPELHHKLLSAERAVTGYKDPYTGEKISLFAQ-----

Target 5dzz. 1. A MKKDLIVREHGIRLLEAQIATGGVIDPVHSHRVPVDVAYHRGYFDEEMNRVLQDPSDDTKGFFDPNTHENLTYLQLLERC-----

Target 5dzz. 1. A VEDPETGLRLLPLTDQAAKGELVYTDSEARDVFEKATVSAPFGKFQGKTVTIWELINSEYFTAEQRRDLLRQFRTGKVT-----

Target 5dzz. 1. A VEKIIKIVITVIEEHEQKQGLCFQGLRALVPAAEELLESGLIDWDLFRQLQLGERSVQEVAEVEGVRRALRSGSVIAGVWL-----DTSKLVFDGLRKKVTAMQLYECQLIDKTTLDKLLKGKKSVEEVA--SEIQPFLRGAGSIAGAS--

Target 5dzz. 1. A EEARQKLSIYEALKKELLQPEAAVALLEAQAGTGHVIDPAT SARLTVDEAVRAGLVGPPELHEKLLSAEKAVTGYKDPYSGASPKEYSLVEAKRKKLISPES TVMLLEAQAATGGI IDPHRNEKLTVD SA IARDLIDFDDRQQIYAAEKAITGFD DPFSG

Target 5dzz. 1. A QSVSLFQALKKGLIPREQGLRLDAQLSTGGTVDP SKSHRLPLDVACARGYLDEETSTALSAPRDDAKTYYPDRTWELATKTVSVSEAIKKNLIDRETGMRLLEAQIASGGVVDPVNSVFLPKDVALARGLIDRDLYRSLNDPRDSQKNFVDPVTKKKVS

Target 5dzz. 1. A YSQLQQQCRPDPLTGLSLLPLSEEAARARQQELYSEVQAREAFQKATVEVPVGSFQGRAVTIWELINSEYFTAEQRQELLYVQLKERCRIEPTGLLLSVQKRS-----

Target 5dzz. 1. A RQFRTGKVTVEKIIKIVITIVIEEVETTRRERLSFSGLRAPVPASELLAAGILSSSQFEQLKD GKTSVKDLSELSSLQTLL-----MSFQGIRQPVTVTELVD SGILRPSTVNELESQQISYDEVG--ERIKDFL

Target 5dzz. 1. A QGSGCLAGIYLESKEKVTIYEAMRRGLLRPSTAILLLEAQAATGFLVDPVRNQRLYVHEAVKAGVVGPPELHEKLLSAEKQGSSCIAGIYNETTKQLGIYEA MKIGLVRPGTALELLEAQAATGFIVDPVSNLRLPVEEAYKRGVGI EFKEKLLSAER

Target 5dzz. 1. A AVTGYKDPYSGSTISLFAQMKKGLVVREHGIRLLEAQIATGGI IDPVHSHRVPVDVACQRGYFDEEMNRVLEDPSDDTKGAVTGYNDPETGNIISLFAQMNKELIEKGHGIRLLEAQIATGGI IDPKESHRLPVDIAYKRGYFNEELSEILSDPSDDTKG

Target 5dzz. 1. A FFDPNTHENLTYRQLLERCVEDPETGLRLLPLKGPEKAEVVETTRVYTEEETTRA FEETQIDIPGGGSHGGSTMSLWEVMFFDPNTEENLTYLQLKERICKDEETGLCLLPLK-----

Target 5dzz. 1. A QSDLIPEEQRAQLMADFQAGRVTKERMIIIIIEIEKTEIVRQQNLASYDYVRRRLTAEDLYEARVISRESYSLLREGTR-----

Target 5dzz. 1. A SLREVLEAESAWRYLYGTGCVAGVYLP GSRQTLPIYQALKKGLLSAEVARLLLEAQAATGFLDPVKGERLTVDEAVRKG-----

Target 5dzz. 1. A LVGPPELHDLRLLSAERAVTGYRDPYTEQTISLFAQMKKDLIPAEALRLLDAQLATGGIVDPRLGFHLPLEVAYQRGYLNK-----

Target 5dzz. 1. A DTHDQLSEPSEVRSYVDPSTDERLSY TQLLRRCRRETSGLFLLPLSEARKLTFRGLRKQITVEELVRSHVMDEATAQRL-----

Target 5dzz. 1. A QEGLTSIEEVSKNLQKFLEGTSSIAGVLVDATKERLSVYQAMKKGIIIRPGTAFELLEAQAATGYVIDPIKGLKLTVEEAV-----

Target 5dzz. 1. A RMGIVGPEFKDLLSAERAVTGYKDPYSGKLISLFAQMKKGLILKDHGIRLLEAQIATGGI IDPEESHRLPVDVAYQRGL-----

Target 5dzz. 1. A FDEEMNEILTDPSDDTKGFFDPNTEENLTYLQLMERCVTDPQTGLRLLPLKEKKRERKTSSKSSVRKRRVVIVDPETGKE-----

Target 5dzz. 1. A MSVYEAYRKGLIDHQTYLELSEQECEWEEITISSSDGVVKSMIIDRRSGRQYDIDEAIAKSLIDRSALDQYRAGTLSITE-----

Target 5dzz. 1. A FADMLSGNAGGFRSRSSSVGSSSSYPISPAVSRTQLASWSDPTEETGPVAGILD TETLEKVSITEAMHRNLVDNITGQRL-----



Target  
5dzz. 1. A

LEAQA

CTGGI

IDPNT

GERFP

VTDA

VNKGL

VDKIM

VDRIN

LAQKA

FCGF

EDPRT

KTMSA

AAQAL

KKGW

LYYE

AQGR

FLEV

Q

Target  
5dzz. 1. A

YLTG

GLIE

PDTP

GRVPL

DEAL

QRGT

VDART

AQKL

RDVS

SAYSK

YLTCP

KTCLK

ISYK

DALDR

SMVE

EETGL

RLL

EEAA

QSS

Target  
5dzz. 1. A

KGY

SPYS

VSGS

GSTT

GSR

SGS

R

TGS

RAG

SR

RGS

F

DATG

SGF

SMTF

SSSS

YSSS

GYGR

RYAS

GPT

SSL

G

P

E

S

A

A

| Model #12                                                                         | File | Built with    | Oligo-State | Ligands | GMQE | QMEANDisCo Global |
|-----------------------------------------------------------------------------------|------|---------------|-------------|---------|------|-------------------|
|  | PDB  | ProMod3 3.3.0 | monomer     | None    | 0.00 | 0.75 ± 0.05       |

| Template | Seq Identity | Oligo-state | QSQE | Found by | Method | Resolution | Seq Similarity | Range    | Coverage | Description                                                |
|----------|--------------|-------------|------|----------|--------|------------|----------------|----------|----------|------------------------------------------------------------|
| 4z6g.1.A | 66.86        | monomer     | 0.00 | HHblits  | X-ray  | 2.65Å      | 0.51           | 65 - 412 | 0.08     | Microtubule-actin cross-linking factor 1, isoforms 1/2/3/5 |

Excluded ligands

| Ligand Name.Number | Reason for Exclusion       | Description   |
|--------------------|----------------------------|---------------|
| PO4.1              | Not biologically relevant. | PHOSPHATE ION |
| PO4.2              | Not biologically relevant. | PHOSPHATE ION |

Target  
4z6g. 1. A

MSGED

QEVRA

VVEDG

SN

GGSG

SPSP

GD

TL

PWN

LEKT

Q

RS

RR

GGG

G

PG

NGS

V

LD

PA

ER

A

V

I

R

I

A

D

E

R

D

R

V

Q

K

K

T

F

T

K

W

N

Target  
4z6g. 1. A

KHL

I

K

A

Q

R

H

I

S

D

L

Y

E

D

L

R

D

G

H

N

L

I

S

L

L

E

V

L

S

G

D

S

L

P

R

E

K

G

R

M

R

F

H

K

L

Q

N

V

Q

I

A

L

D

Y

L

R

H

R

Q

V

K

L

V

N

I

R

N

D

D

I

A

D

G

N

P

K

L

T

Target  
4z6g. 1. A

LGL

I

W

T

I

I

L

H

F

Q

I

S

D

I

Q

V

S

G

Q

S

E

D

M

T

A

K

E

L

L

L

W

S

Q

R

M

V

E

G

Y

Q

G

L

R

C

D

N

F

T

S

S

W

R

D

G

R

L

F

N

A

I

I

H

R

H

K

P

M

L

I

D

M

N

K

V

Y

R

Q

Target  
4z6g. 1. A

TN

LE

N

D

Q

A

F

S

V

A

E

R

D

L

G

V

T

R

L

L

D

P

E

D

V

D

P

Q

P

D

E

K

S

I

I

T

V

S

S

L

D

A

M

P

R

V

D

V

Q

D

G

V

K

A

N

E

L

Q

L

R

W

Q

E

Y

R

E

L

V

L

L

L

Q

Target  
4z6g. 1. A

W

I

R

A

H

T

A

A

F

E

R

R

F

S

S

F

E

E

I

E

I

L

W

C

Q

F

L

K

F

K

E

T

E

L

P

A

K

E

A

D

K

N

R

S

K

G

I

Y

Q

S

L

E

G

A

V

Q

A

G

Q

L

K

V

P

P

G

Y

H

P

L

D

V

E

K

E

W

G

K

L

Target  
4z6g. 1. A

H

V

A

I

L

E

R

E

K

Q

L

R

S

E

F

E

R

L

E

R

L

Q

R

I

V

S

K

L

Q

M

E

A

G

L

C

E

E

Q

L

N

Q

A

D

A

L

L

Q

S

D

V

R

L

L

A

A

G

K

A

P

Q

R

A

G

E

V

E

R

D

L

D

K

A

D

G

M

I

R

L

L

F

Target  
4z6g. 1. A

ND

V

Q

A

L

K

D

G

R

H

P

Q

G

E

Q

M

Y

R

R

V

Y

R

L

H

E

R

L

V

A

I

R

T

E

Y

N

L

R

L

R

G

T

P

R

H

E

P

E

D

S

T

L

R

Y

L

Q

D

L

L

A

W

V

E

E

N

Q

R

R

V

D

S

A

E

W

G

V

D

L

P

Target  
4z6g. 1. A

S

V

E

A

Q

L

G

S

H

R

G

L

H

Q

S

V

E

E

F

R

A

K

I

E

R

A

R

T

D

E

G

Q

L

S

P

A

T

R

G

A

Y

R

D

C

L

G

R

L

D

L

Q

Y

A

K

L

L

N

S

S

K

A

R

L

S

L

E

S

L

H

G

F

V

A

A

T

K

E

L

Target  
4z6g. 1. A

M

W

L

S

E

K

E

E

E

E

V

G

F

D

W

S

E

R

N

S

N

M

A

A

K

E

A

Y

S

A

L

M

R

E

L

E

L

K

E

K

I

K

E

I

Q

S

T

G

D

R

L

L

R

E

D

H

P

A

R

P

T

V

E

S

F

Q

A

A

L

Q

T

Q

W

S

W

M

L

Q

Target  
4z6g. 1. A

L

C

C

C

I

E

A

H

L

K

E

N

T

A

Y

F

Q

F

F

S

D

V

R

E

A

E

E

Q

L

R

K

L

Q

E

T

L

H

R

K

Y

T

C

D

R

S

I

T

V

T

R

L

E

D

L

L

Q

D

A

Q

D

E

K

D

Q

L

N

E

Y

R

G

H

L

S

G

L

A

K

R

A

K

Target  
4z6g. 1. A

A

I

V

Q

L

T

P

R

N

P

T

Q

P

T

R

G

R

V

P

L

L

A

V

C

D

Y

K

V

E

A

T

V

H

K

G

D

E

C

Q

M

L

G

P

A

Q

P

F

H

K

V

L

S

S

S

G

S

E

A

A

V

P

S

V

C

F

L

V

P

P

P

N

Q

E

A

L

E

A

V

Target  
4z6g. 1. A

A

R

L

E

A

Q

H

Q

A

L

V

T

L

W

H

Q

L

H

T

D

M

K

S

L

L

A

W

Q

S

L

R

D

V

Q

L

I

R

S

W

S

L

V

T

F

R

T

L

K

P

E

E

Q

R

Q

A

L

R

S

L

E

L

H

Y

Q

A

F

L

R

D

S

Q

D

A

G

G

F

G

P

E

Target  
4z6g. 1. A

D

R

L

Q

A

E

R

E

Y

G

S

C

S

R

H

Y

Q

L

L

Q

S

L

E

Q

G

E

Q

E

S

R

C

Q

R

C

I

S

E

L

K

D

I

R

L

Q

L

E

A

C

E

T

R

T

V

H

R

L

R

L

P

L

D

K

E

P

A

R

E

C

A

Q

R

I

A

E

Q

Q

K

A

|                      |                                                                                     |
|----------------------|-------------------------------------------------------------------------------------|
| Target<br>4z6g. 1. A | QAEVEGLGKGVARLSAEAEKVLALPEPSPAAPTLRSELELTGKLEQVRSLSAIYLEKTKTISLVIRSTQGAEELRAHE      |
| Target<br>4z6g. 1. A | EQLKEAQAVPAALPELEATKAAMKKLRAQAEAAQPVFDALRDELRGAEVGERLQQRHGERDVEVERWRERVTLQLLRWQ     |
| Target<br>4z6g. 1. A | AVLAQTDVRQRELEQLGRQLRYRESADPLGAWLQDARRRQEQIQAVPLADSQAVREQLRQEKALLEEIERHAEKVEECQ     |
| Target<br>4z6g. 1. A | RFAKQYINAIKDYEQLVITYKAQLEPVASPAKKPKVQSGSESVIQEYVDLRTRYSELSTLTSQYIRFISETLRRMEEEER    |
| Target<br>4z6g. 1. A | LAEQQRAEERERLAEVEAALEKQRQLAEAHQAQAQAEREAEQELQRRMQEEVARREEVAVDAQQQKRSIQEELQQLRQSS    |
| Target<br>4z6g. 1. A | EAEIQAKARQVEAAERSRLRIEEEIRVVRLQLLETTERQRGGAEGELQALRARAEAEAKRQAQEEAERLRRQVQEETQR     |
| Target<br>4z6g. 1. A | KRQAEAEGLRVKAEAEAAAREKQRALQALEELRLQAEAAERRLRQAEAEERARQVQVALETAQRSQAELQSKHASFAEKT    |
| Target<br>4z6g. 1. A | AQLERTLEEEHVTVVQLREEATRREQQQAEERAREEAERELERWQLKANEALRLRLQAE EVAQQKSLAQAEAEKQKEAA    |
| Target<br>4z6g. 1. A | EREARRRGKAEQAVRQRELAEQELERQRQLAEGTAQQRLAAEQELIRLRAETEQGEQQRQLLEEELARLQSEAAAAATQK    |
| Target<br>4z6g. 1. A | RQELEAELAKVRAEMEVLLASKARAEESRSSEKSKRLEAEAGRFRELAEEAARLRALAEAAKRQRQLAEEDAARQRA       |
| Target<br>4z6g. 1. A | EAERVLSEKLAAISEATRLKTEAEIALKEKEAENERLRRLAEDEAFQRRRLEEQAQHKADIEERLAQLRKASESELERQ     |
| Target<br>4z6g. 1. A | KGLVEDTLRQRRQVEEEILALKASFEEAAAGKAELELELGRIRGNAEDTLRSKEQAEQEAARQRQLAAEEERRRRREAEER   |
| Target<br>4z6g. 1. A | VQKSLAAEEEAARQRKAAL EEVERLKAKVEEARRLRERAEHESVRQLQLAQEAAQKRLQAE EKAHAFVQQKEQELQQTL   |
| Target<br>4z6g. 1. A | QQEQSVLEKL RSEAEAAARRAAEEAEARERAEREAQSRQRVEEAERLKQA AEEQAQAQAQAAAEKLKEAEQEAAARR     |
| Target<br>4z6g. 1. A | AQAEQAALRQKQAADAEMEKHKFAEQTLRQKAQVEQELTALRLKLEETDHQKSILDQELQRLKA EVTEAARQRSQVEEE    |
| Target<br>4z6g. 1. A | LFSVRVQMEELGKLKARIEAENRALILRDKDNTQRLLQEEAEKMKQVAEEAARLSVAAQEAAARLRQLAEEDLAQQRALAE   |
| Target<br>4z6g. 1. A | KMLKEKMQAVQEATRLKAEALLQQQKELAQEQARRLQEDKEQMAQQLAQETQGFQRTLETERQRQLEMSAEAEERLRLRV    |
| Target<br>4z6g. 1. A | AEMSRAQARAEDAQRFRKQAE EIGAKLHRTLATQEKVTLVQTLETQRQQSDRDA DRLREATAELEREKDKLKKEAELL    |
| Target<br>4z6g. 1. A | QLKSEEMQTVQQEQLLQETQALQQSFLSEKDSLLQRERFIEEEKAKLERLFQDEVAKAQKLREEQQRQQQQMQQEKQQLL    |
| Target<br>4z6g. 1. A | ASMEEARRRQHEAEEGVRRKQEELQLLEQQRQQQEQLLA EENRRLRERLEHLEEEHRAALAHSEEITAAQAAATRALPNG   |
| Target<br>4z6g. 1. A | QDAADGPAAEPEHAFEGLRQKVPAQQLQEAGILSTEELQRLAQGHTTVAELTQREDVRRYLQGHSSIAGLLLKPANEKLT    |
| Target<br>4z6g. 1. A | IYAALRRQLLSPGTALILLEAQ AASGFLDPVRNRRLTVTEAVKEGVVGP ELPHHKLLSAERAVTGYKDPYTGEKISLFAQA |
| Target<br>4z6g. 1. A | MKKDLIVREHGIRLLEAQIATGGVIDPVHSHRVPVDVAYHRYGFDEEMNRVLQDPSDDTKGFFDPNTHENLTYLQLLERC    |
| Target<br>4z6g. 1. A | VEDPETGLRLLPLTDQAAKG GELVYTDSEARDVFEKATVSAPFGKFQGKTVTIWELINSEYFTA EQRRDLLRQFRTGKVT  |
| Target               | VEKIIKIVITVIEEHEQKQQLCFQGLRALVPAAELLES GII DWDLFRQLQLGERSVQEVAEVEGVRRALRGSGVIAGVWL  |

4z6g. 1. A -----  
Target EEARQKLSIYEALKKELLQPEAAVALLEAQAGTGHVIDPATSARLTVDEAVRAGLVGPPELHEKLLSAEKAVTGYKDPYSG  
4z6g. 1. A -----  
Target QSVSLFQALKKGLIPREQGLRLDLAQLSTGGTVDPSPKSHRLPLDVACARGYLDEETSTALSAPRDDAKTYYPDRTWELAT  
4z6g. 1. A -----  
Target YSQLQQCRPDPLTGLSLLPLSEEAARARQQELYSEVQAREAFQKATVEVPVGSFQGRAVTIWELINSEYFTAERQRELL  
4z6g. 1. A -----  
Target RQFRTGKVTVEKIIKIVITIVEEVETTRRERLSFSGLRAPVPASELLAAGILSSSQFEQLKDGTSTVKDLSELSSLQTLL  
4z6g. 1. A -----  
Target QGSGCLAGIYLESKEKVTIYEAMRRGLLRPSTAILLEAQATGFLVDPVRNQRLVHEAVKAGVVGPELHEKLLSAEK  
4z6g. 1. A -----  
Target AVTGYKDPYSGSTISLFQAMKKGLVREHGIRLLEAQIATGGIIDPVHSHRVPVDVACQRGYFDEEMNRVLEDPSSDDTKG  
4z6g. 1. A -----  
Target FFDPNTHENLTYRQLLERCVEDPETGLRLLPLKGPEKAEVVETTRVYTEETTRAFETQIDIPGGGSHGGSTMSLWEVM  
4z6g. 1. A -----  
Target QSDLIPEEQRAQLMADFQAGRVTKERMI III IEI IEKTEIVRQQNLASYDYVRRRLTAEDLYEARVISRESYSLLREGTR  
4z6g. 1. A -----  
Target SLREVLEAESAWRYLYGTGCVAGVYLPGSRQTLPIYQALKKGLLSAEVARLLEAQATGFLDPVKGERLTVDEAVRKG  
4z6g. 1. A -----  
Target LVGPPELHDLRLSAERAVTGYRDPYTEQTISLFQAMKKDLIPAEELRLDLAQLATGGIVDPRLGFHLPLEVAYQRGYLNK  
4z6g. 1. A -----  
Target DTHDQLSEPSEVRSYVDPSTDERLSYTQLLRRCRRDETSGFLPLPLSEARKLTFRGLRKQITVEELVRSHVMDEATAQRL  
4z6g. 1. A -----  
Target QEGLTSIEEVSKNLQKFLEGTSSIAGVLVDATKERLSVYQAMKKGIIRPGTAFELLEAQATGYVIDPIKGLKLTVEEAV  
4z6g. 1. A -----  
Target RMGIVGPEFKDLLSAERAVTGYKDPYSGKLISLFQAMKKGLILKDHGIRLLEAQIATGGIIDPEESHRLPVDVAYQRGL  
4z6g. 1. A -----  
Target FDEEMNEILTDPSSDDTKGFFDPNTEENLTYLQLMERCVTDPQTGLRLLPLKEKKRERKTSSKSSVRKRRVVIVDPETGKE  
4z6g. 1. A -----  
Target MSVYEAYRKGLIDHQTYLELSEQEWEIEITISSSDGVVKSMIIDRRSGRQYDIDEAIAKSLIDRSALDQYRAGTSLITE  
4z6g. 1. A -----  
Target FADMLSGNAGGFRSRSSSVGSSSSYPISPAVSRTQLASWSDPTEETGPVAGILDDETLEKVSITEAMHRNLVDNITGQRL  
4z6g. 1. A -----  
Target LEAQAQTGGIIDPNTGERFPVTDVANKGLVDKIMVDRINLAQKAFCGFEDPRTKTKMSAAQALKKGWLYYEAGQRFLEVQ  
4z6g. 1. A -----  
Target YLTGGLIEPDTGRVPLDEALQRGTVDARTAQKL RDVSAYS KYLTCPKTKLKISYKDALDRSMVEEGTGLRLLEAAQSS  
4z6g. 1. A -----  
Target KGYYPSPYSVSGSGSTGSRSGSRTGSRAGSRRGSFDTGSGFSMTFSSSSYSSSGYGRRYASGPTSSLGGPESAAA  
4z6g. 1. A -----

| Model #05                                                                           | File | Built with    | Oligo-State | Ligands | GMQE | QMEANDisCo Global |
|-------------------------------------------------------------------------------------|------|---------------|-------------|---------|------|-------------------|
|  | PDB  | ProMod3 3.3.0 | monomer     | None    | 0.00 | 0.73 ± 0.05       |

| Template | Seq Identity | Oligo-state | QSQE | Found by | Method | Resolution | Seq Similarity | Range       | Coverage | Description |
|----------|--------------|-------------|------|----------|--------|------------|----------------|-------------|----------|-------------|
| 5dzz.1.A | 51.14        | monomer     | 0.00 | HHblits  | X-ray  | 2.60Å      | 0.45           | 3645 - 4131 | 0.11     | Desmoplakin |

The template contained no ligands.

|                      |                                                                                   |
|----------------------|-----------------------------------------------------------------------------------|
| Target<br>5dzz. 1. A | MSGEDQEVRAVVEDGSNGGSGSPSPGDTLPWNLEKTQSRRRGGGGPGNGSVLDPAERAVIRIADERDRVQKKTFTKWVN   |
| Target<br>5dzz. 1. A | KHLIKAQRHISDLYEDLRDGHNLISLLEVLSGDSLPREKGRMRFHKLQNVQIALDYLRRHQVKLVNIRNDDIADGNPKLT  |
| Target<br>5dzz. 1. A | LGLIWTIILHFQISDIQVSGQSEDMTAKEKLLWSQRMVEGYQGLRCDNFTSSWRDGRLFNAIIHRHKPMLIDMNKVYRQ   |
| Target<br>5dzz. 1. A | TNLENLDQAFSVAERDLGVTRLLDPEDVDVPQPDEKSIITYVSSLYDAMPRPVDVQDGVKANELQLRWQEYRELVLVLLQ  |
| Target<br>5dzz. 1. A | WIRAHTAAFEERRFPSSFEEIEILWCQFLKFKETELPAKEADKNRSKGIYQSLEGAVQAGQLKVPPGYHPLDVEKEWGKL  |
| Target<br>5dzz. 1. A | HVAILEREKQLRSEFERLERLQRIVSKLQMEAGLCEEQLNQADALLQSDVRLLAAGKAPQRAGEVERDLKADGMIRLLF   |
| Target<br>5dzz. 1. A | NDVQALKDGRHPQGEQMYRRVYRLHERLVAIRTEYNLRLRGTPRHPELEDSTLRYLQDLLAWVEENQRRVDSAEGVDLP   |
| Target<br>5dzz. 1. A | SVEAQLGSHRGLHQSVVEEFRAKIERARTDEGQLSPATRGAYRDCLGRDLQYAKLLNSSKARLSLES LHGFVAAATKEL  |
| Target<br>5dzz. 1. A | MWLSEKEEEEVGFWDWERNNSMAAKKEAYSALMRELELKEKKIKEIQSTGDRLLREDHPPARPTVESFQAALQTQWSWMLQ |
| Target<br>5dzz. 1. A | LCCIEAHLKENTAYFQFFSDVREAEELRKLQETLHRKYTCDRSITVTRLEDLLQDAQDEKDLNEYRGHLSGLAKRAK     |
| Target<br>5dzz. 1. A | AIVQLTPRNPTQPTRGRVPLLAVCDYKQEATVHKGDECQMLGPAQPFHWKVLSSSGSEAAVPSVCFLVPPPNQEALAV    |
| Target<br>5dzz. 1. A | ARLEAQHQALVTLWHQLHTDMKSLLAWSLSRDVQLIRWSLVTFRTLKPEEQRQALRSLELHYQAFLRDSQDAGGFGPE    |
| Target<br>5dzz. 1. A | DRLQAEREYGSCSRHYQQLQSLEQGEQEESRCRCISELKDIRLQLEACETRIVHRLRLPLDKEPARECAQRIAEQQA     |
| Target<br>5dzz. 1. A | QAEVEGLGKGVARLSAEAEKVLALPEPSPAAPTLRSELELTGKLEQVRSLSAIYLEKLKLTISLVIRSTQGAEELRAHE   |
| Target<br>5dzz. 1. A | EQLKEAQAVPAALPELEATKAAMKKLRAQAEAAQPVFDALRDELGAQEVGERLQQRHGERDVEVERWRERVTLLERWQ    |
| Target<br>5dzz. 1. A | AVLAQTDVRQRELEQLGRQLRYRESADPLGAWLQDARRRQEIQAVPLADSQAVREQLRQEKALLEETERHAEKVEECQ    |
| Target<br>5dzz. 1. A | RFAKQYINAIKDYLQLVITYKAQLEPVASPAKKPKVQSGSESVIQEYVDLRTRYSELSTLTSQYIRFISETLRRMEEER   |
| Target<br>5dzz. 1. A | LAEQQRAEERERLAEVEAALEKQRQLAEAHQAQAQAEAEQELQRRMQEEVARREEVAVDAQQQKRSIQEELQQLRQSS    |
| Target<br>5dzz. 1. A | EAEIQAKARQVEAAERSRLRIEEEIRVVRLQLETTERQRGGAEGELQALRARAEAEQAQKQAQEEAERLRRQVQEETQR   |
| Target<br>5dzz. 1. A | KRQAEELGLRVKAEAEAREKQRALQALEELRLQAEAAERRLRQAEAEERARQVQVALETAQRSQAELQSKHASFAEKT    |
| Target<br>5dzz. 1. A | AQLERTLEEEHVTVVQLREEATRREQQAEAEERAREEAERELERWQLKANEALRLRLQAE EVAQQKSLAQAEAEKQKEAA |
| Target<br>5dzz. 1. A | EREARRRGKAEQAVRQRELAEQELERQRQLAEGTAQQLAAEQELIRLRAETEQGEQQRQLLEEELARLQSEAAAAATQK   |

Target 5dzz. 1. A RQELEAELAKVRAEMEVLLASKARAEESRSSEKSKRLEAEAGRFRELAEEAARLRALAEAAKRQRQLAEEDAARQRA-----

Target 5dzz. 1. A EAERVLSEKLAAISEATRLKTEAEIALKEKEAENERLRRRLAEDEAFQRRRLEEQAQHKADIEERLAQLRKASESELERQ-----

Target 5dzz. 1. A KGLVEDTLRQRRQVEEEILALKASFEEAAAGKAELELELGRIRGNAEDTLRSKEQAEQEAAARQRQLAAEEERRRREAEEER-----

Target 5dzz. 1. A VQKSLAAEEEAARQRKAAL EEVERLKAKVVEARRLRERAEHESVRQLQLAQEAAQKRLQAEKKAHAFVQQKEQELQQT-----

Target 5dzz. 1. A QQEQSVLEKLRSEAEAAARRAAEEAEARERAEERAAQSRQRVEEAERLKQAAEEQAQAQAQAAAEKLRKEAEQEAAARR-----

Target 5dzz. 1. A AQAEQAALRQKQAADAEMEKHKKFAEQTLRQKAQVEQELTALRLKLEETHQKSILDQELQRLKAEVTEAARQRSQVEEE-----

Target 5dzz. 1. A LFSVRVQMEELGKLKARIEAENRALILRDKDNTQRLLQEEAEKMKQVAEEAARLSVAAQEAAARLRQLAEEDLAQQRALAE-----

Target 5dzz. 1. A KMLKEKMQAVQEATRLKAEAEELLQQQKELAQEQARRLQEDKEQMAQQLAQETQGFQRTLETERQRQLEMSAEERLRLRV-----

Target 5dzz. 1. A AEMSRAQARAEDAQRFRKQAEIIGAKLHRTLATQEKVTLVQTLETQRQQSDRDADRLREATAELEREKDKLKKEAELL-----

Target 5dzz. 1. A QLKSEEMQTVQQEQLLQETQALQQSFLSEKDSLLQRERFIEEEKAKLERLFQDEVAKAQKLREEQQRQQQMQQEKQQL-----

Target 5dzz. 1. A ASMEEARRRQHEAEEGVRRKQEELQLLEQQRQQEQQLAEENRRLRERLEHLEEEHRAALAHSEEITAAQAAATRALPNG-----

Target 5dzz. 1. A QDAADGPAAEPEHAFEGLRQKVPAAQLQEAGILSTEELQRLAQGHTTVAELTQREDVRRYLQGHSSIAGLLKPAN EKLT-----

Target 5dzz. 1. A IYAALRRQLSPGTALILLEAQASGFLDPVRNRRLTVTEAVKEGVGPPELHHKLLSAERAVTGYKDPYTGEKISL FQA-----

Target 5dzz. 1. A MKKDLIVREHGIRLLEAQIATGGVIDPVHSHRVPVDVAYHRYGFDEEMNRVLQDPSDDTKGFFDPNTHENLTYLQLLERC-----

Target 5dzz. 1. A VEDPETGLRLLPLTDQAAKGELVYTDSEARDVFEKATVSAPFGKFQGKTVTIWELINSEYFTAQRRLDLRQFRTGKVT-----

Target 5dzz. 1. A VEKIIKIVITVIEEHEQKGQLCFQGLRALVPAAEELLESIGIIDWDLFRQLQLGERSVQEVAEVEGVRRALRGSGVIAGVWL-----

Target 5dzz. 1. A EEARQKLSIYEALKKELLQPEAAVALLEAQAGTGHVIDPAT SARLTVDEAVRAGLVGPPELHEKLLSAEKAVTGYKDPYSG-----

Target 5dzz. 1. A QSVSLFQALKKGLIPREQGLRLD AQLSTGGTVDP SKSHRLPLDVACARGYLDEETSTALSAPRDDAKTYDPTWELAT-----

Target 5dzz. 1. A YSQLQQQCRPDPLTGLSLLPLSEEAARARQQELYSEVQAREAFQKATVEVPVGSFQGRAVTIWELINSEYFTAQRQELL-----

Target 5dzz. 1. A RQFRTGKVTVEKIIKIVITIVIEEVETTRRERLSFSGLRAPVPASELLAAGILSSSQFEQLKDGKTSVKDLSLSSLQTL-----

Target 5dzz. 1. A QGSGCLAGIYLESKEKVTIYEAMRRGLLRPSTAILLEAQAA TGFLVDPVRNQRLYVHEAVKAGVVGPELHEKLLSAEK-----

Target 5dzz. 1. A AVTGYKDPYSGSTISL FQAMKGLV VREHGIRLLEAQIATGGIIDPVHSHRVPVDVACQRGYFDEEMNRVLEDP SDDTKG-----

Target 5dzz. 1. A FFDPNTHENLTYRQLLERCVEDPETGLRLLPLKGPEKAEVVETTRVYTEETTRAFEETQIDIPGGGSHGGSTMSLWEVM-----

Target 5dzz. 1. A QSDLIPEEQRAQLMADFQAGRVTKERMI I I I IEI IEKTEIVRQQNLASYDYVRRRLTAEDLYEARVISRESYSLLREGTR-----SKLVFDGLRKKVTAMQLYECQLIDKTTLDKLLKGKK

Target 5dzz. 1. A SLREVLEAESAWRYLYGTGCVAGVYLP GSRQTLPIYQALKKGLLSAEVARL LLEAQAA TGFLDPVKGERLTVDEAVRKG-----SVEEVAS--ETQPFLRGAGSIAGAS--ASPKEKYSLEVAKRKKLISPESTM LLEAQAA TGGIIDPHRNEKLTVD SAIARD

Target LVGPELHDRLLSAERAVTGYRDPYTEQTISLFQAMKKDLIPAEELRLLDAQLATGGIVDPRLGFHLPLEVAYQRGYLNK  
5dzz. 1. A LIDFDDRQQIYAAEKAITGFDDPFSGKTVSVSEAIKKNLIDRETGMRLLEAQIASGGVDPVNSVFLPKDVALARGLIDR

Target DTHDQLSEPSE-VRSYVDPSTDERLSYTHLRRRCDSTGLFLLPLSEARKLTFRGLRKQITVEELVRSHVMDEATAQR  
5dzz. 1. A DLYRSLNDRDSQKNFVDPVTKKKVSYVQLKERCRIEPTGLLLSVQKR-SMSFQGIQPVTVTELVDGILRSTVNE

Target LQEGLTISIEVSKNLQKFLEGTSSIAAGVLVDATKERLSVYQAMKKGIIRPGTAFELLEQAATGYVIDPIKGLKLTVEEA  
5dzz. 1. A LESGQISYDEVERIKDFLQGSSCIAGIYNETTKQLGIYEAMKIGLVRPGTALELLEQAATGFIVDPVSNRLRPVEEA

Target VRMGIVGPEFKDLLSAERAVTGKDPYSGKLISLFQAMKKGLILKDHGIRLLEAQIATGGIIDPEESHRLPVDVAYQRG  
5dzz. 1. A YKRGVLGIEFKEKLLSAERAVTGNDPETGNIISLFQAMNKELIEKGHGIRLLEAQIATGGIIDPKESHRLPVDIAYKRG

Target LFDEEMNEILTDPSDDTKGFFDPNTEENLTYLQLMERCVTDPQTGLRLLPLKEKKRERKTSKSSVRKRRVIVDPETGK  
5dzz. 1. A YFNEELSEILSDPSDDTKGFFDPNTEENLTYLQLKERICDEETGLCCLPLK-----

Target EMSVYEAYRKGLIDHQTYLELSEQECEWEEITISSSDGVVKSMIIDRRSGRQYDIDEAIAKSLIDRSALDQYRAGTLSIT  
5dzz. 1. A -----

Target EFADMLSGNAGGFRSRSSSVGSSSSYPISPAVSRTQLASWSDPTEETGPVAGILDTETLEKVSITEAMHRNLVDNITGQR  
5dzz. 1. A -----

Target LLEAQAQTGGIIDPNTGERFPVTDVANKGLVDKIMVDRINLAQKAFCGFEDPRTKTKMSAAQALKKGWLYYEAGQRFLEV  
5dzz. 1. A -----

Target QYLTGGLIEPDTGPRVPLDEALQRGTVDARTAQKLRDVSAYS KYLTCPKTKLKISYKDALDRSMVEEGTGLRLLEAAQAS  
5dzz. 1. A -----

Target SKGYSPYSVSGSGSTTGSRSRGTGSRAGSRGSGFDTATGSGFSMTFSSSSYSSSGYGRRYASGPTSSLGGPESAAA  
5dzz. 1. A -----

| Model #20                                                                           | File | Built with    | Oligo-State | Ligands | GMQE | QMEANDisCo Global |
|-------------------------------------------------------------------------------------|------|---------------|-------------|---------|------|-------------------|
|  | PDB  | ProMod3 3.3.0 | monomer     | None    | 0.00 | 0.50 ± 0.05       |

| Template | Seq Identity | Oligo-state | QSQE | Found by | Method | Resolution | Seq Similarity | Range     | Coverage | Description         |
|----------|--------------|-------------|------|----------|--------|------------|----------------|-----------|----------|---------------------|
| 8iah.1.2 | 15.20        | monomer     | 0.00 | HHblits  | EM     | -          | 0.28           | 186 - 630 | 0.22     | Spectrin beta chain |

Excluded ligands

| Ligand Name.Number | Reason for Exclusion        | Description              |
|--------------------|-----------------------------|--------------------------|
| ADP.1              | Binding site not conserved. | ADENOSINE-5'-DIPHOSPHATE |
| ADP.2              | Binding site not conserved. | ADENOSINE-5'-DIPHOSPHATE |
| ADP.3              | Binding site not conserved. | ADENOSINE-5'-DIPHOSPHATE |
| ADP.4              | Binding site not conserved. | ADENOSINE-5'-DIPHOSPHATE |
| ADP.5              | Binding site not conserved. | ADENOSINE-5'-DIPHOSPHATE |
| ADP.6              | Binding site not conserved. | ADENOSINE-5'-DIPHOSPHATE |
| ADP.7              | Binding site not conserved. | ADENOSINE-5'-DIPHOSPHATE |
| ADP.8              | Binding site not conserved. | ADENOSINE-5'-DIPHOSPHATE |
| ADP.9              | Binding site not conserved. | ADENOSINE-5'-DIPHOSPHATE |
| ADP.10             | Binding site not conserved. | ADENOSINE-5'-DIPHOSPHATE |
| ADP.11             | Binding site not conserved. | ADENOSINE-5'-DIPHOSPHATE |
| ADP.12             | Binding site not conserved. | ADENOSINE-5'-DIPHOSPHATE |

Target MSGEDQEVRAVVEDGSNGSGSPSPGDTLPWNLEKTQSRRRGGGGPGNGSVLDP AERAVIRIADERDRVQKKTF TKWVN  
8iah. 1. 2 -----

Target KHLIKAQRHISDLYEDLRDGHNLISLLEVLSGDSLPREKGRMRFHKLQNVQIALDYLRHRQVKLVNIRNDDIADGNPKLT  
8iah. 1. 2 -----

|                      |                                                                                                                                                                      |
|----------------------|----------------------------------------------------------------------------------------------------------------------------------------------------------------------|
| Target<br>8iah. 1. 2 | LGLIWTIILHFQISDIQVSGQSEDMTAKEKLLLSQRMVEGYQGLRCDNFTSSWRDGRLFNAIIHRHKPMLIDMNK--VY<br>-----VQKKTFTKWVNSHLARV-SCRITDLYKDLRDGRMLIKLLEVLSGEMLPKPTKGKM                      |
| Target<br>8iah. 1. 2 | RQTNLENLDQAFSVAERDLGVTRL-LDPEDVDVPQPEKSIITYVSSLYDAMPRVPDVQDGVKANELQLRWQEYRELVL<br>RIHCLENVDKALQFLK-EQRVHLENMGSHDIVDGNH--RLVLGLIWTIILRFQIQDIVVQTQEG-----RETRSAKDA     |
| Target<br>8iah. 1. 2 | LLQWIRAHTAAF---EERRFPSSFEEIEILWCQFLKFKETELPAK-EAD---KNRSKGIYQSLEGAVQAGQLKVPPGYHP<br>LLLWCQMKTAGYPNVNFTNTSSWKDGLAFNALIHKHRPDLIDFDKLKDSNARHNLEHAFDVAERQ-----LGTIQLLDP  |
| Target<br>8iah. 1. 2 | LDVE-----KEWGKLVHAIL--EREKQLRSEFERLERLQRIVSKLQMEAGLCEEQLNQADALLQSDVRL--<br>EDVFTENPDEKSIITYVVAFYHYFSKMKVLAVEGKRVGKVIDHAIETEKMIKYSGLASDLLTWIEQTITVLNSRKFANS           |
| Target<br>8iah. 1. 2 | -LAAGKAPQRAGEVERDLK--A--DGMIRLLFNDVQA-LKDGR---HPQGEQMYRRVYRLHERLVAIRTEYNLRLRGT<br>LAGVQQQLQAFSTYRTVEKPPKFQEKGNLEVLLFTIQSRMRANNQKVYTPHDGKLVSDINRAWESLEEAEYRRELALRSE   |
| Target<br>8iah. 1. 2 | PRH----PELEDSTLRYLQDLLAWVEENQRRVDSAEGWVDLPVSVEAQLGSHRGLHQSVVEEFAKIERARTDEGQLS---P<br>LIRQEKLEQLARRFRKAAMRETWLNENQRLVAQDNFGYDLAAVEAAKKKHEAIEDTAAAYEERVRALEDLARELELENY |
| Target<br>8iah. 1. 2 | ATRGAYRDCLGRDLQYAKLLNSSKARLSLE---SLHGFVAAATKELMWLSEKEEEEVGFWDWSEKSNMAAKKEAYSAL<br>HDQKRITARKDNILRLWNYLQELLQSRQRLETTLALQQLFQDMLHSIDWMDIKAHLLSAEFGKHLEAEDLLQKHKLM      |
| Target<br>8iah. 1. 2 | MRELELKEKKIKEIQSTGDRLLREDH---PARPTVESFQAALQTQWSWMLQLCCIEAHLKENTAYFQFFSDVREAEQQL<br>EADIAIQGDKVKAITAATLQFTEETGYQPCDPQVIRDRVSHLEQCFAELSNTAAGRKAQLEQSKRLWKLFWEMDEAKSWI  |
| Target<br>8iah. 1. 2 | RKLQETLHRKYTCDSITVTRLEDLLQDAQDEKDLNEYRGHLSGLAKRAKAI VQLTPRNPTQPTRGRVPLLAVCDYKQV<br>KEKEQIYS--SLGYGKDLT SVLILQRKHKA FEDELRRLDPHLDQIFQEAEDMVALKQFG--YP-----K--NEAW---  |
| Target<br>8iah. 1. 2 | EATVHKGDECMQLGPAQPFHWKVLSSSGSEAAVPSVCFLVPPPNQEALEAVARLEAQHQALVTLWHQLHTDMKSLLAWS<br>-----V-----KEVSAQWDQLKEVPAQWNQLKELAASRKKNLQDTENFFQ                                |
| Target<br>8iah. 1. 2 | LSRDVQLIRSWSLVTFRTLKPEEQ---RQALRSLELHYQAFLRDSQDAGGF-----GPEDRLQAEREYGSCS<br>FQGDVDDLKAWLQDAHKLLSGEDVGQDEGATRALGKKHKDFLEELEESRGVMEHLEQQAQDFPERFRDSPDVNRLQVLR          |
| Target<br>8iah. 1. 2 | RHYQQLQSLSEQGEQ---ESRCQRCISELKDIRLQLEACETRTRVHRLRLPLDKEPARECAQRIAEQKKAQAEVEGLGKG<br>DLYQQVVAQADLRRQRLQDALDLYTVFGETDACELWMGEKEKWLAQ-MDIPD---TLEDLEVQHRFDILDQEMKTLIAQ  |
| Target<br>8iah. 1. 2 | VARLSAEAEKVLALPEPSPAAPT LRSELELTGKLEQVRSLSAIYLEKLKTISL---VIRSTQGAEALRAHEEQLEAQ<br>IDGVNVAANSLVESN--HPRSTEVKQYQDHLNTRWREFQTMVLARREAVDSALRVHNYCVDCEETSKWIIDTKKVVESTK   |
| Target<br>8iah. 1. 2 | AVPAALPELEATKAAMKKLRAQAEAAQPVFDALRDELGAQEVGERLQQRHGERDVEVERWRERVTLLERWQAVLAQTD<br>DLGQDLAGVMAIQRKLSGLERDVAAIQVRVGALEQ-----ESHRLMES---HREQEKDIGERQAYVEELWQGLQALK      |
| Target<br>8iah. 1. 2 | VRQRELEQLGRQLRYYRESADPLGAWLQDARRRQEIQIYAVPLADSQAVREQLRQEKALLEEIERHAEKVEECQRFQAKQYI<br>GQEALLGKS-SQLQAFQLDADFPAWLSAQKEVASK--DMPESLPEAEQLLQQAALKDDIDRHQENYQHVKASGEKVI  |
| Target<br>8iah. 1. 2 | NAIKDYELQLVTYKAQLEPVASPAKKPKVQSGSESVIQEYVDLTRYSELSTLTSQYIRFISETLRRMEEEERLAEQRA<br>HG-----                                                                            |
| Target<br>8iah. 1. 2 | EERERLAEVEAALEKQRQLAEAHAKAKAQAEREAEQLQRRMQEEVARREEVAVDAQQKRSIQEELQQLRQSSEAEIQA<br>-----                                                                              |
| Target<br>8iah. 1. 2 | ARQVEAAERSRLRIEEIIRVVRLQLETTERQRGGAEGELQALRARAEAEAKRQAQEEAERLRRQVQEETQRKRQAEAE<br>-----                                                                              |
| Target<br>8iah. 1. 2 | LGLRVKAEAEAREKQALQALEELRLQAEAEERRLQAEAEERARQVQVALETAQRSQAELQSKHASFAEKTAQLERTL<br>-----                                                                               |
| Target<br>8iah. 1. 2 | EEHVTVVQLREEATRREQQAEAEARAREEAERELERWQLKANEALRLRLQAEVAQQKSLAQAEAEKQKEAAEREARR<br>-----                                                                               |
| Target<br>8iah. 1. 2 | GKAEQAVRQRELAEQELERQRLAEGTAQRLAAEQELIRLRAETEQQEQQLLEEELARLQSEAAAATQKRQELEAE<br>-----                                                                                 |
| Target<br>8iah. 1. 2 | LAKVRAEMEVLLASKARAEESRSSEKSKRLEAEAGRFRLEAEEARLRALAEAAKRQRLAEEDAARQRAEAEVLS<br>-----                                                                                  |
| Target<br>8iah. 1. 2 | EKLAAISEATRLKTEAEIALKEKEAENERLRLRAEDEAFQRRRLEEQAQHKADIEERLAQLRKASESELERQKGLVEDT<br>-----                                                                             |
| Target<br>8iah. 1. 2 | LRQRRQVEEIEILALKASFEKAAAGKAELELELGRIRGNAEDTLRSKEQAEQEAARQRLAAEEERRRREAEERVQKSLAA<br>-----                                                                            |
| Target               | EEEAARQRKAAL EEVERLKAKVEEARRLRERAEHESVRQLQLAQEAQAQKRLQAEKKAHAFVQQKEQELQQLQQEQSVL                                                                                     |

8iah. 1. 2 -----  
Target EKL RSEAE AARRAAEEAEERERAEREAAQSRQRVEEAERLKQAAEEQAQAQAQAAAAEKL RKEAEQE AARRAQAEQAA  
8iah. 1. 2 -----  
Target LRQKQAADAEMEKHKKFAEQTLRQKAQVEQELTALRLKLEETDHQKSILDQELQRLKAEVTEAARQRSQVEEELFSVRVQ  
8iah. 1. 2 -----  
Target MEELGKLKARIEAENRALILRDKDNTQRL LQEEAEKMKQVAEEAARLSVAAQE AARLRQLAEEDLAQQRALAEKMLKEKM  
8iah. 1. 2 -----  
Target QAVQEATRLKAE AELLQQQKELAQEQARRLQEDKEQMAQQLAQETQGGFQRTLETERQRQLEMSAE AERLRLRVAEMSRAQ  
8iah. 1. 2 -----  
Target ARAEEDAQRFRKQAE EIGAKLHRTELATQEKVTLVQTLETQRQQSDRDADRLREAI AE LEREKDKLKKEAELLQLKSEEM  
8iah. 1. 2 -----  
Target QTVQEQELLQETQALQQSFLSEKDSLLQRERFIEEEKAKLERLFQDEVAKAQKLREEQQRQQQM QQEKQQLLASMEEAR  
8iah. 1. 2 -----  
Target RRQHEAE EGVRRKQEELQLLEQQRQQEQQLLAEENRRLRERLEHLEEEHRAALAHSEEITAAQAAATRALPNGQDAADGP  
8iah. 1. 2 -----  
Target AAEP EHA FEGLRQKVPAQQLQEAGILSTEELQRLAQGHTTVAELTQREDVRRYLQGHSSIAGLLLKPANEKLTIIYAALRR  
8iah. 1. 2 -----  
Target QLLSPGTALILLEAQAASGFLLDPVRNRRLTVTEAVKEGVVGP ELHHKLLSAERAVTGYKDPYTGEKISL FQAMKKDLIV  
8iah. 1. 2 -----  
Target REHGIRLLEAQIATGGVIDPVHSHRPVDVAYHRGYFDEEMNRVLQDPSDDTKGFFDPNTHENLTYLQLLERCVEDPETG  
8iah. 1. 2 -----  
Target LRLPLTDQAAKG GELVYTDSEARDVF EKATVSAPFGKFQGKTVTIWELINSEYFTAEQR RDLLRQFRTGKVTVEKIIKI  
8iah. 1. 2 -----  
Target VITVIEEHEQKGQLCFQGLRALVPAELLES GII DWDLFRQLQLGERSVQEVAEVEGVRRALRGSGVIAGVWLEEARQKL  
8iah. 1. 2 -----  
Target SIYEALKKELLQPEAAVALLEAQAGTGHVIDPAT SARLTVDEAVRAGLVGP ELHEKLLSAEKAVTGYKDPYSGQSVSLFQ  
8iah. 1. 2 -----  
Target ALKKGLIPREQGLRL LDAQLSTGGTVDP SKSHRLPLDVACARGYLDEETSTALSAPRDDAKTY YDPRTWELATYSQLQQQ  
8iah. 1. 2 -----  
Target CRPDPLTGLSLLPLSEEAARARQQELYSEVQAREAFQKATVEVPVGSFQGRAVTIWELINSEYFTAEQRQELLRQFRTGK  
8iah. 1. 2 -----  
Target VTVEKIIKIVITIVEEVETRRERLSFSGLRAPVPASELLAAGILSSSQFEQLKD GKTSVKDLSELSSLQTL LQSGGCLA  
8iah. 1. 2 -----  
Target GIYLESKEKVTIYEAMRRGLLRPSTAILLLEAQAATGFLVDPVRNQRLYVHEAVKAGVVGP ELHEKLLSAEKAVTGYKD  
8iah. 1. 2 -----  
Target PYSGSTISL FQAMKKGLV VREHGIRLLEAQIATGGIIDPVHSHRPVDVACQRGYFDEEMNRVLEDPSDDTKGFFDPNTH  
8iah. 1. 2 -----  
Target ENLTYRQLLERCVEDPETGLRLPLKGPEKAEVVETTRVYTEETRRAFEETQIDIPGGGSHGGSTMSLWEVMQSDLIPE  
8iah. 1. 2 -----  
Target EQRAQLMADFQAGRVTKERMI IIIIE IIEKTEIVRQQNLASYDYVRRRLTAEDLYEARVISRESYSLLREGTRSLREVLE  
8iah. 1. 2 -----  
Target AESAWRYLYGTGCVAGVYLP GSRQTLPIYQALKKGLLSAEVARLLLEAQAATGFLDPVKGERLTVDEAVRKGVLGP ELH  
8iah. 1. 2 -----  
Target DRLLSAERAVTGYRDPYTEQTISL FQAMKKDLIPAE EALRL LDAQLATGGIVDPRLGFHLPLEVAYQRGYLNKDTHDQLS  
8iah. 1. 2 -----  
Target EPSEVRSYVDPSTDERLSY TQLLRRCRRDETSGLFLLPLSEARKLTFRGLRKQITVEELVRSHVMDEATAQRLQEGLTSI  
8iah. 1. 2 -----  
Target EEVSKNLQKFLEGTSSIAGVLVDATKERLSVYQAMKKGIIRPGTAFELLEAQAATGYVIDPIKGLKLTVEEAVRMGIVGP  
8iah. 1. 2 -----



|                      |                                                                                   |
|----------------------|-----------------------------------------------------------------------------------|
| Target<br>8iah. 1. 2 | EFKDKLLSAERAVTGYKDPYSGKLI SLFQAMKKGLILKDHGIRLLEAQIATGGIIDPEESHRLPVDVAYQRGLFDEEMNE |
| Target<br>8iah. 1. 2 | ILTDPSDDTKGFFDPNTEENLTYLQLMERCVTDPQTGLRLLPLKEKKRERKTSKSSVRKRRVVIVDPETGKEMSVYEAY   |
| Target<br>8iah. 1. 2 | RKGLIDHQTYLELSECEWEIEITISSDGVVKSMIIDRRSGRQYDIDEAIAKSLIDRSALDQYRAGTLSITEFADMLSG    |
| Target<br>8iah. 1. 2 | NAGGFRSRSSSVGSSSSYPISPAVSRTQLASWSDPTEETGPVAGILDTELEKVSITEAMHRNLVDNITGQRLEAACT     |
| Target<br>8iah. 1. 2 | GGIIDPNTGERFPVTDVANKGLVDKIMVDRINLAQKAFCGFEDPRTKTKMSAAQALKKGWLYYEAGQRFLEVQYLTGGLI  |
| Target<br>8iah. 1. 2 | EPDTPGRVPLDEALQRGTVDARTAQKL RDVSAYS KYLTCPKTKLISYKDALDRSMVEEGTGRLLEAAAQSSKGYSPY   |
| Target<br>8iah. 1. 2 | SVSGSGSTTGSRSGRTGSRAGSRRGSFDTGSGFSMTFSSSSYSSSGYGRRYASGPTSSLGGPESAAA               |

| Model #17                                                                         | File | Built with    | Oligo-State                   | Ligands | GMQE | QMEANDisCo Global |
|-----------------------------------------------------------------------------------|------|---------------|-------------------------------|---------|------|-------------------|
|  | PDB  | ProMod3 3.3.0 | monomer (matching prediction) | None    | 0.00 | 0.65 ± 0.05       |

| Template | Seq Identity | Oligo-state | QSQE | Found by | Method | Resolution | Seq Similarity | Range    | Coverage | Description                               |
|----------|--------------|-------------|------|----------|--------|------------|----------------|----------|----------|-------------------------------------------|
| 6s13.1.A | 29.82        | homo-dimer  | 0.00 | HHblits  | X-ray  | 3.10Å      | 0.36           | 62 - 448 | 0.08     | Calponin homology domain protein putative |

Excluded ligands

| Ligand Name.Number | Reason for Exclusion        | Description |
|--------------------|-----------------------------|-------------|
| CA.1               | Binding site not conserved. | CALCIUM ION |
| CA.2               | Binding site not conserved. | CALCIUM ION |

|                      |                                                                                                                                                                      |
|----------------------|----------------------------------------------------------------------------------------------------------------------------------------------------------------------|
| Target<br>6s13. 1. A | MSGEDQEVRAVVEDGSNGGSGSPSPGDTLPWNLEKTQSRRRGGGGPGNGSVLDPAERAVIRIADERDRVQKKTFTKWWN<br>-----ELVAQWEKVQIKTFTKWWN                                                          |
| Target<br>6s13. 1. A | KHLIKAQRHISDLYEDLRDGHNLISLLEVLSGDSLPR-EKGRMRFHKLQNVQIALDYLRRHQVKLVNIRNDDIADGNPKL<br>MHLAKKGRKINDVTDFKNGVELCALLEIIGETTICKVTNPKMRIQMTENLDKALRFIQSRDVKLGTIGPTDIVDGNVKL  |
| Target<br>6s13. 1. A | TLGLIWTIILHFQISDIQVSGQSEDMTAKEKLLWSQRMVEGYQGLRCDNFTSSWRDGRLFNAI IHRHKPMLIDMNKVYR<br>TLGLVWTLILRFAISELSAE---GLSAKQGLLLWCQKKCEPYP-VKVENFSESFKDGKVFCAL IHRHRPDLLDWETVGE |
| Target<br>6s13. 1. A | QTNLENLDQAFSVAERLDGVTRLLDPEDVDV-PQPDEKSIITYVSSLYDAMPRPVDPVDQGVK-----ANELQLRWQE<br>D-DRANLEKAFDVAEKELGIPKLLDVDDIVNMPRPDERSVMTYVAALYKVFSSNDQVEKAGKRAGNFLDLLRATEGMVHD   |
| Target<br>6s13. 1. A | YRELVLLLLQWIRAHTAAFEERRFPSSFEEIEILWCQFLKFKETELPAKEADKNRSGIYQSLEGAVQAG---QLKVPPG<br>YEQRAQALKENIEAAINKMNGVEPSDEYHQVKEQINETKNYRKGDKRAFIKEQGDLATLFGQINSKLRGMKRPVYVAPEG  |
| Target<br>6s13. 1. A | YHPLDVEKEWGKLVAILEREKQLRSEFERLERLQRIVSKLQMEAGLCEEQLNQADALLQSDVRLLAAGKAPQRAGEVER<br>LDPKSLEGYIANISEAERALRSKLN TAMR--NCLIALRKAFADPANATDAKINEYRTFVTD-----               |
| Target<br>6s13. 1. A | DLDKADGMIRLLFNDVQALKDGRHPQGEQMYRRVYRLHERLVAIRTEYNLRLRGTPRHPELEDSTLRYLQDLLAWVEENQ<br>-----                                                                            |
| Target<br>6s13. 1. A | RRVDSAEWGVDLPSVEAQLGSHRGLHQSVVEEFAKIERARTDEGQLSPATRGAYRDCLGRDLQYAKLLNSSKARLSLE<br>-----                                                                              |
| Target<br>6s13. 1. A | SLHGFVAAATKELMWLSEKEEEEVGFDSERNSNMAAKKEAYSALMRELELKEKKIKEIQSTGDRLLREDHPARPTVESF<br>-----                                                                             |
| Target               | QAALQTQWSWMLQLCCIEAHLKENTAYFQFFSDVREAEELRKQLQETLHRKYTCDRSITVTRLEDLLQDAQDEKDLNE                                                                                       |

6s13. 1. A -----

Target YRGHLSGLAKRAKAIVQLTPRNPTQPTRGRVPLLAVCDYKQEATVHKGDECQMLGPAQPFHWKVLSSSGSEAAVPSVCF

6s13. 1. A -----

Target LVPPPNQEALEAVARLEAQHQALVTLWHQLHTDMKSLLAWQSLSRDVQLIRSWSLVTFRTLKPEEQRQALRSLELHYQAF

6s13. 1. A -----

Target LRDSQDAGGFGPEDRLQAEREYGSCSRHYQQLLSLEQGEQESRCQRCISELKDIRLQLEACETRTRVHRLRLPLDKEPA

6s13. 1. A -----

Target RECAQRIAEQKKAQAEVEGLGKGVARLSAEAEKVLALPEPSPAAPTLRSELELTGKLEQVRSLSAIYLEKLTISLVIR

6s13. 1. A -----

Target STQGAEELRAHEEQLKEAQAVPAALPELEATKAAMKKLRAQAEAAQPVFDALRDELGAQEVGERLQQRHGERDVEVER

6s13. 1. A -----

Target WRERVTQLLERWQAVLAQTDVRQRELEQLGRQLRYRESADPLGAWLQDARRRQEQIQAVPLADSQAVREQLRQEKALLE

6s13. 1. A -----

Target EIERHAEKVEECQRFQAKYINAIKDYELQLVTYKAQLEPVASPAKKPKVQSGSESVIQEYVDLRTRYSELSTLTSQYIRF

6s13. 1. A -----

Target ISETLRRMEEEERLAEQQRAEERERLAEVEAALEKQRQLAEHAQAKAQAEREAEQLQRRMQEEVARREEVAVDAQQQKR

6s13. 1. A -----

Target SIQEELQQLRQSSEAEIQAKARQVEAAERSRLRIEEEIRVVRLQLETTERQRGGAEGELQALRARAEAEAKRQAQEEA

6s13. 1. A -----

Target ERLRRQVQEETQRKRQAEELGLRVKAEAAAREKQRALQALEELRLQAEAAERRLRQAEARARQVQVALETAQRSQAQ

6s13. 1. A -----

Target ELQSKHASFAEKTAQLERTLEEEHVTVVQLREEATRREQQAEERAREEAERELERWQLKANEALRLRLQAE EVAQQKS

6s13. 1. A -----

Target LAQAEAEKQKEAAEREARRRGKAEQAVRQRELAEQELERQRQLAEGTAQQLAAEQELIRLRAETEQGEQQRQLLEEEL

6s13. 1. A -----

Target ARLQSEAAAAATQKRQELEAELAKVRAEMEVLLASKARAEESRSSSEKSKRLEAEAGRFRELAEEAARLRALAEAAKRQ

6s13. 1. A -----

Target RQLAEEDAARQRAEAERVLSEKLAAISEATRLKTEAEIALKEKEAENERLRLAEDEAFQRRRLEEQAQHKADIEERLA

6s13. 1. A -----

Target QLRKASESELERQKGLVEDTLRQRRQVEEEILALKASFEEAAAGKAELELELGRI RNAEDTLRSKEQAEQEAARQQLA

6s13. 1. A -----

Target AEEERRRREAEEERVQKSLAEEEAARQKAALEEVEERLKAKVEEARRLRERAEHESVRQLQLAQEAAQKRLQAEKHAHF

6s13. 1. A -----

Target AVQQKEQELQQTLLQEQSVLEKLRSEAEAAARRAAEEAEARERAEREAAQSRQRVEEAERLKQAAEEQAQAQAQAAAE

6s13. 1. A -----

Target KLRKEAEQEAAARRAQAEQAALRQKQAADAEMEKKKF AEQTLRQKAQVEQELTALRLKLEETDHQKSILDQELQRLKAEV

6s13. 1. A -----

Target TEAARQRSQVEEELFSVRVQMEELGKLKARIEAENRALILRDKDNTQRLQEEAEKMKQVAEEAARLSVAAQEAARLRQL

6s13. 1. A -----

Target AEEDLAQQRALAEKMLKEKMQAVQEATRLKAEALLQQQKELAQEQARRLQEDKEQMAQQLAQETQGFQRTLETERQRQL

6s13. 1. A -----

Target EMSAEERLRLRVAEMSRAQARAEDAQRFRKQAEIIGAKLHRTELATQEKVTLVQTLETQRQQSDRDADRLREAI AELE

6s13. 1. A -----

Target REKDKLKKEAELLQLKSEEMQTVQQEQLLQETQALQQSFLSEKDSLLQRERFIEEEKAKLERLFQDEVAKAKLREEQQR

6s13. 1. A -----

Target QQQQMMEQEKQLLASMEEAARRRQHEAEEGVRRKQEELQLLEQQRQQEQQLLAEENRRLRERLEHLEEHRAALAHSEEIT

6s13. 1. A -----

Target AAQAAATRALPNGQDAADGPAAEPEHAFEGLRQKVPAAQLQEAGILSTEELQRLAQGHTTVAELTQREDVRRYLQGHSSI

6s13. 1. A -----

|                      |                                                                                              |
|----------------------|----------------------------------------------------------------------------------------------|
| Target<br>6s13. 1. A | AGLLKPAN EKLTIIYAALRRQLSPGTALILLEAQAASGFLDPVRNRRLTVTEAVKEGVVGP ELHHKLLSAERAVTGYK<br>-----    |
| Target<br>6s13. 1. A | DPYTGEKISL FQAMKKDLIVREHGIRLLEAQIATGGVIDPVHSHRVPVDVAYHRGYFDEEMNRVLQDPSDDTKGFFDPNT<br>-----   |
| Target<br>6s13. 1. A | HENLTYLQLLERCVEDPETGLRLLPLTDQAAKG GELVYTDSEARDVFEKATVSAPFGKFQGKTVTI WELINSEYFTA EQR<br>----- |
| Target<br>6s13. 1. A | RDLLRQFR TGKVTVEKIIKIVITVIEEHEQKGQLCFQGLRALVPAAE LLESGIIDWDLFRQLQLGERSVQEVAEVEGVRR<br>-----  |
| Target<br>6s13. 1. A | ALRSGSVIAGVWLEEARQKLSIYEALKKELLQPEAAVALLEAQAGTGHVIDPAT SARLTVDEAVRAGLVGP ELHEKLLSA<br>-----  |
| Target<br>6s13. 1. A | EKAVTGYKDPYSGQSVSLFQALKKGLIPREQGLRLLDAQ LSTGGTVDP SKSHRLPLDVACARGYLDEETSTALSAPRDDA<br>-----  |
| Target<br>6s13. 1. A | KTYYPRTWELATYSQLQQCRPDPLTGLSLLPLSEEAARARQQELYSEVQAREAFQKATVEVPVGSFQGRAVTIWELIN<br>-----      |
| Target<br>6s13. 1. A | SEYFTA EQRQELLRQFR TGKVTVEKIIKIVITVIEEVETTRRERLSFSGLRAPVPA SELLAAGILSSSQFEQLKDGKTSV<br>----- |
| Target<br>6s13. 1. A | KDLSLSSLQTL LQGSGCLAGIYLESKEKVTIYEAMRRGLLRPSTAILLLEAQATGFLVDPVRNQRLYVHEAVKAGV<br>-----       |
| Target<br>6s13. 1. A | GPELHEKLLSAEKAVTGYKDPYSGSTISL FQAMKKGLVVREHGIRLLEAQIATGGIIDPVHSHRVPVDVACQRGYFDEEM<br>-----   |
| Target<br>6s13. 1. A | NRVLEDP SDDTKGFFDPNTHENLTYRQLLERCVEDPETGLRLLPLKGPEKAEVVETTRVYTEETTRAFEETQIDIPGGG<br>-----    |
| Target<br>6s13. 1. A | SHGGSTMSLWEVMQSDLIPEEQRAQLMADFQAGRVTKERMIIIIIEIIEKTEIVRQQNLASYDYVRRRLTAEDLYEARVI<br>-----    |
| Target<br>6s13. 1. A | SRESYSLLREGTRSLREVLEASAWRYLYGTGCVAGVYLP GSRQTLPIYQALKKGLLSAEVARLLLEAQATGFLDPVK<br>-----      |
| Target<br>6s13. 1. A | GERLTVDEAVRKGLVGP ELHDRLLSAERAVTGYRDPYTEQTISL FQAMKKDLIPAEALRLLDAQ LATGGIVDPRLGFHL<br>-----  |
| Target<br>6s13. 1. A | PLEVAYQRGYLNKDTHDQLSEPSEVRSYVDPSTDERLSY TQLLRRCRRDETSGLFLLPLSEARKLTFRGLRKQITVEELV<br>-----   |
| Target<br>6s13. 1. A | RSHVMDEATAQRLQEGLTSIEEVSKNLQKFLEGTSSIAGVLVDATKERLSVYQAMKGIIRPGTAFELLEAQATGYVID<br>-----      |
| Target<br>6s13. 1. A | PIKGLKLTVEEA VRMGIVGPEFKDKLLSAERAVTGYKDPYSGKLISL FQAMKKGLILKDHGIRLLEAQIATGGIIDPEES<br>-----  |
| Target<br>6s13. 1. A | HRLPVDVAYQRGLFDEEMNEILTDPSDDTKGFFDPNTEENLTYLQLMERCVTDPQTGLRLLPLKEKKRERKTSKSSVRK<br>-----     |
| Target<br>6s13. 1. A | RRVVIDPETGKEMS VYEAYRKGLIDHQTYLELSEQECWE EITISSDGVVKSMIIDRRSGRQYDIDEAIAKSLIDRSA<br>-----     |
| Target<br>6s13. 1. A | LDQYRAGTLSITEFADMLSGNAGGFRSRSSSVGSSSSYPISP AVSRTQLASWSDPTEETGPVAGILDTETLEKVSITEAM<br>-----   |
| Target<br>6s13. 1. A | HRNLVDNITGQRLLEAQA CTGGIIDPNTGERFPVTD AVNKGLVDKIMVDRINLAQKAFCGFEDPRTKTKMSAAQALKKW<br>-----   |
| Target<br>6s13. 1. A | LYYEAGQRFLEVQYLTGGLIEPDTPGRVPLDEALQR GTVDARTAQKL RDVSAYSKYLTCPKTKLKISYKDALDRSMVEEG<br>-----  |
| Target<br>6s13. 1. A | TGLRLL EAAAQSSKGYSPYSVSGSGSTTGSRS GSRTGSRAGSRRGSF DATGSGFSMTFSSSSYSSSGYGRRYASGPTSS<br>-----  |
| Target<br>6s13. 1. A | LGGPESAAA<br>-----                                                                           |

| Model #08                                                                         | File | Built with    | Oligo-State | Ligands | GMQE | QMEANDisCo Global |
|-----------------------------------------------------------------------------------|------|---------------|-------------|---------|------|-------------------|
| 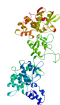 | PDB  | ProMod3 3.3.0 | monomer     | None    | 0.00 | 0.63 ± 0.05       |

| Template | Seq Identity | Oligo-state | QSQE | Found by | Method | Resolution | Seq Similarity | Range       | Coverage | Description |
|----------|--------------|-------------|------|----------|--------|------------|----------------|-------------|----------|-------------|
| 5dzz.1.A | 47.12        | monomer     | 0.00 | HHblits  | X-ray  | 2.60Å      | 0.42           | 2649 - 3222 | 0.11     | Desmoplakin |

The template contained no ligands.

|                      |                                                                                           |
|----------------------|-------------------------------------------------------------------------------------------|
| Target<br>5dzz. 1. A | MSGEDQEVRAVVEDGSNGGSGSPSPGDTLPWNLEKTQSRRRGGGPGNGSVLDPAERAVIRIADERDRVQKKTFTKWVN<br>-----   |
| Target<br>5dzz. 1. A | KHLIKAQRHISDLYEDLRDGHNLISLLEVLSGDSLPREKGRMRFHKLQNVQIALDYLHRHQVKLVNIRNDDIADGNPKLT<br>----- |
| Target<br>5dzz. 1. A | LGLIWTIILHFQISDIQVSGQSEDMTAKEKLLWSQRMVEGYQGLRCDNFTSSWRDGRLFNAIIHRHKPMLIDMNKVYRQ<br>-----  |
| Target<br>5dzz. 1. A | TNLENLDQAFSVAERDLGVTRLDPEDVDVPQDEKSIITYVSSLYDAMPRPVDVQDGVKANELQLRWQEYRELVLVLLQ<br>-----   |
| Target<br>5dzz. 1. A | WIRAHTAAFEERRFPSSFEEIEILWCQFLKFKETELPAKEADKNRSKGIYQSLEGAVQAGQLKVPPGYHPLDVEKEWGKL<br>----- |
| Target<br>5dzz. 1. A | HVAILEREKQLRSEFERLERLQRIVSKLQMEAGLCEEQLNQADALLQSDVRLLAAGKAPQRAGEVERDLKADGMIRLLF<br>-----  |
| Target<br>5dzz. 1. A | NDVQALKDGRHPQGEQMYRRVYRLHERLVAIRTEYNLRLRGTPRHPELEDSTLRYLQDLLAWVEENQRRVDSAEGVDDL<br>-----  |
| Target<br>5dzz. 1. A | SVEAQLGSHRGLHQSVEEFRAKIERARTDEGQLSPATRGAYRDCLGRDLQYAKLLNSSKARLSLES LHGFVAAATKEL<br>-----  |
| Target<br>5dzz. 1. A | MWLSEKEEEVGFWDWERNNSMAAKKEAYSALMRELELKEKKIKEIQSTGDRLLREDHPARPTVESFQAALQTQSWMLQ<br>-----   |
| Target<br>5dzz. 1. A | LCCIEAHLKENTAYFQFFSDVREAEELRKLQETLHRKYTCDRSITVTRLEDLLQDAQDEKQQLNEYRGHLSGLAKRAK<br>-----   |
| Target<br>5dzz. 1. A | AIVQLTPRNPTQPTRGRVPLLAVCDYKVEATVHKGDECQMLGPAQPFHWKVLSSSGSEAAVPSVCFLVPPPNQEALAV<br>-----   |
| Target<br>5dzz. 1. A | ARLEAQHQALVTLWHQLHTDMKSLAWQSLSRDVQLIRWSLVTFRTLKPEEQRQALRSLELHYQAFLRDSQDAGGFGPE<br>-----   |
| Target<br>5dzz. 1. A | DRLQAEREYGSCSRHYQQLLSLEQGEQEESRCRCISELKDIRLQLEACETRTVHRLRLPLDKEPARECAQRIAEQKKA<br>-----   |
| Target<br>5dzz. 1. A | QAEVEGLGKGVARLSAEAEKVLALPEPSPAAPTLRSELELTGKLEQVRSLSAIYLEKLKTIISLVIRSTQGAEELRAHE<br>-----  |
| Target<br>5dzz. 1. A | EQLKEAQAVPAALPELEATKAAMKKLRAQAEAAQPVFDALRDELGAQEVGERLQQRHGERDVEVERWRERVTLLELRWQ<br>-----  |
| Target<br>5dzz. 1. A | AVLAQTDVRQRELEQLGRQLRYYRESADPLGAWLQDARRRQEQIQAVPLADSQAVREQLRQEKALLEEIERHAEKVEECQ<br>----- |
| Target<br>5dzz. 1. A | RFAKQYINAIKDYLQLVITYKAQLEPVASPAKKPKVQSGSESVIQEYVDLRTRYSELSTLTSQYIRFISETLRRMEEEER<br>----- |
| Target<br>5dzz. 1. A | LAEQQRAEERERLAEVEAALEKQRQLAEAHAQAKAQAEAAQELQRRMQEEVARREEVAVDAQQKRSIQEELQQLRQSS<br>-----   |
| Target<br>5dzz. 1. A | EAEIQAKARQVEAAERSRLRIEEIIRVVRLQLETTERQRGGAEGELQALRARAEAEAKRQAQEEAERLRRQVQEETQR<br>-----   |

|                      |                                                                                                                                                                            |
|----------------------|----------------------------------------------------------------------------------------------------------------------------------------------------------------------------|
| Target<br>5dzz. 1. A | KRQAEAEGLRVKAEAEAREKQRALQALEELRLQAEAEERRLRQAEAEERARQVQVALETAQRSQAELQSKHASFAEKT<br>-----                                                                                    |
| Target<br>5dzz. 1. A | AQLERTLEEEHVTVVQLREEATRREQQAEERAREEAERELERWQLKANEALRLRLQAE EVAQQKSLAQAEAEKQKEAA<br>-----                                                                                   |
| Target<br>5dzz. 1. A | EREARRRGKAEQAVRQRELAEQELERQRQLAEGTAQQRLAAEQELIRLRAETEQGEQQRQLLEEELARLQSEAAAAATQK<br>-----                                                                                  |
| Target<br>5dzz. 1. A | RQELEAELAKVRAEMEVLLASKARAEESRSSESKQRLEAEAGRFRELAEEAARLRALAEAAKRQRQLAEEDAARQRA<br>-----                                                                                     |
| Target<br>5dzz. 1. A | EAERVLSEKLAAISEATRLKTEAEIALKEKEAENERLRLLAEDEAFQRRRLEEQAQHKADIEERLAQLRKASESELERQ<br>-----                                                                                   |
| Target<br>5dzz. 1. A | KGLVEDTLRQRRQVEEEILALKASFEEAAAGKAELELELGRI RNAEDTLRSKEQAEQEAARQRQLAAEEERRRREAEEER<br>-----                                                                                 |
| Target<br>5dzz. 1. A | VQKSLAE EEEAARQRKAAL EEVERLKAKV EEARRLRERAEHESVRQLQLAQEAAQKRLQAE EKAHAFVQQKEQELQQTL<br>-----                                                                               |
| Target<br>5dzz. 1. A | QQEQSVLEKL RSEAEAAARRAAEEAEERARAEREAQSRQRVEEAERLKQAE EEAQAQAQAQAAAEKL RKEAEQEAAARR<br>-----                                                                                |
| Target<br>5dzz. 1. A | AQAEQAALRQKQAADAEMEKHKFAEQTLRQKAQVEQELTALRLKLEETHQKSIDLQELQRLKAEVTEAARQRSQVEEE<br>-----                                                                                    |
| Target<br>5dzz. 1. A | LFSVRVQMEELGKLKARIEAENRALILRDKDNTQRLQEEAEKMKQVAEEAARLSVAAQEAARLRQLAEEDLAQQRALAE<br>-----                                                                                   |
| Target<br>5dzz. 1. A | KMLKEKMQAVQEATRLKAEAEELLQQQKELAQEQARRLQEDKEQMAQQLAQETQGFQRTLETERQRQLEMSAEERLRLRV<br>-----                                                                                  |
| Target<br>5dzz. 1. A | AEMSRAQARAEDAQRFRRQAEETGAKLHRTELATQEKVTLVQTLETQRQQSDRDADRLREAI AELEREKDKLKKEAELL<br>-----                                                                                  |
| Target<br>5dzz. 1. A | QLKSEEMQTVQQEQLLQETQALQQSFLSEKDSLLQRERFIEEEKAKLERLFQDEVAKAQKLREEQQRQQQQMQQEKQQLL<br>-----                                                                                  |
| Target<br>5dzz. 1. A | ASMEEARRRQHEAE EGVRRKQEELQLLEQQRQQQEQLLA EENRRLRERLEHLEEEHRAALAHSEEITAAQAAATRALPNG<br>-----                                                                                |
| Target<br>5dzz. 1. A | QDAADGPAAEPEHAFEGLRQKVPAQQLQEAGILSTEELQRLAQGHTTVAELTQREDVRRYLQGHSSIAGLLLPANEKLT<br>-----DTSKLVFDGLRKKVTAMQLYECQLIDKTTLDKLLKGKKSVEEVA--SEIQPFLRGAGSIAGAS--ASPKEYS           |
| Target<br>5dzz. 1. A | IYAALRRQLLSPGTALILLEAQAASGFLDPVRNRLTVTEAVKEGVVGPPELHHKLLSAERAVTGYKDPYTGEKISL FQA<br>LVEAKRKKLISP ESTVM LLEAQAATGGIIDPHRNEKLTVDSAIARDLIDFDDRQQIYAAEKAITGFDDPFSGKT VSVSEA    |
| Target<br>5dzz. 1. A | MKKDLIVREHGIRLLEAQIATGGVIDPVHSHRVPVDVAYHRGYFDEEMNRVLQDPSDDTKGFFDPNTHENLTYLQLLERC<br>IKKNLIDRETGMRLLEAQIASGGVDPVNSVFLPKDVALARGLIDRDLYRSLNDPRDSQKNFVDPVTKKKVS YVQLKERC       |
| Target<br>5dzz. 1. A | VEDPETGLRLLPLTDQAAKGGE LVYTDSEARDVFEKATVSAPFGKFQGKTVTIWELINSEYFTA EQRRDLLRQFRTGKVT<br>RIEPTHG LLLLSVQKR-----                                                               |
| Target<br>5dzz. 1. A | VEKIIKIVITVIEEHEQGQLCFQGLRALVPAAELLESGLIDWDLFRQLQLGERSVQEVAEVEGVRRALRGSGVIAGVWL<br>-----SMSFQGIRQPVVTTELVDSGILRPSTVNELESGQISYDEVGE--RIKDFLQGSSCIAGIYN                      |
| Target<br>5dzz. 1. A | EEARQKLSIYEALKKELLQPEAAVALLEAQAGTGHVIDPAT SARLTVDEAVRAGLVGPPELHEKLLSAEKAVTGYKDPYSG<br>ETTKQKLG IYEAMKIGLVRPGTALELLEAQAATGFIVDPVSNLRLPV EEA YKRG LVGIEFKEKLLSAERAVTGYNDPETG |
| Target<br>5dzz. 1. A | QSVSLFQALKKGLIPREQGLRL LDAQLSTGGTVDP SKSHRLPLDVACARGYLDEETSTALSAPRDDAKTYYPDRTWELAT<br>NIISL FQAMNKELIEKGHGIRLLEAQIATGGIIDPKESHRLPVDIAYKRGYFNEELSEILSDPSDDTKGFFDPNTEENLT    |
| Target<br>5dzz. 1. A | YSQLQQCRPDPLTGLSLLPLSEEAARARQQELYSEVQAREAFQKATVEVPVGSFQGRAVTIWELINSEYFTA EQRQELL<br>YLQLKERICKDEETGLCLPLK-----                                                             |
| Target<br>5dzz. 1. A | RQFRTGKVTVEKIIKIVITVIEEVETTRRERLSFSGLRAPVPASELLAAGILSSSQFEQLKD GKTSVKDLSELSSLQTLL<br>-----                                                                                 |
| Target<br>5dzz. 1. A | QGGGCLAGIYLESKEKVTIYEAMRRGLLRPSTAILLEAQAATGFLVDPVRNQRLYVHEAVKAGVVGPPELHEKLLSAEK<br>-----                                                                                   |
| Target               | AVTGYKDPYSGSTISL FQAMKGLVVREHGIRLLEAQIATGGIIDPVHSHRVPVDVACQRGYFDEEMNRVLEDPSDDTKG                                                                                           |

5dzz. 1. A -----  
Target FFDPNTHENLTyrQLLERCVEDPETGLRLLPLKGPEKAEVVETTRVYTEETRRAFEETQIDIPGGGSHGGSTMSLWEVM  
5dzz. 1. A -----  
Target QSDLIPeeQRAQLMADFQAGrvTKermIIIIIEIIEKTEIVRQQNLASYDYVRRRLTAEDLYEARVISRESYSLLREGTR  
5dzz. 1. A -----  
Target SLREVLEAESAWRYLYGTGCVAGVYLPgsRqTLPIYQALKKGLLSAEVARLLLEAQAATGFLDPVKGERLTVDEAVRKg  
5dzz. 1. A -----  
Target LVGPelHdRLLSAERAVTGYRDPYtEQTISLfqAMKkDLIPAEeALRLlDAQLATGGIVDPRLGFHLPLEVAYQRGYLNk  
5dzz. 1. A -----  
Target DTHDQLSEPSEvRSYVDPSTDERLSYtQLLRRCRRDETSGFLlPLSEARKLTFRGLRKQITVEELVRSHVMDEATAQRL  
5dzz. 1. A -----  
Target QEGLTSIEEVSKNLQKFLEGTSSiAGVLVDATKERLSVYqAMKGIIRPGTAFELLEAQAATGYVIDPIKGLKLTVEEAV  
5dzz. 1. A -----  
Target RMGIvGPEfKdKLLSAERAVTGYKDPYSGKLISLfqAMKGLILKDHGIRLLEAQIATGGIIDPEESHRLPVDVAYQRGL  
5dzz. 1. A -----  
Target FDEEMNEILTDPSDDTKGFFDPNTEENLYLqLMERCvTDPQTGLRLLPLKEKKRERKTSskSSVRKRRVIVDPETGKE  
5dzz. 1. A -----  
Target MSVYEAYRKGLIDHQTYLELSEQeCEWEEITISSSDGVVKSMIIDRRSGRQYDIDEAIAKSLIDRSALDQYRAGTlSITE  
5dzz. 1. A -----  
Target FADMLSGNAGGFRSRSSSVGSSSSYPISPAVSRTQLASWSDPTEETGPVAGILDtETLEKVSITEAMHRNLVDNITGQRL  
5dzz. 1. A -----  
Target LEAQACTGGIIDPNTGERFPVTDaVNKGLVDKIMVDRINLAQKAfCGFEDPRTKTKMSAAQALKKGWLYYEAGQRfLEVQ  
5dzz. 1. A -----  
Target YLTGGLIEPDTPGRVPLDEALQRGTVDARTaQKLrdVSAYSkyLTCPKTKLKISYKDAlDRSMVEEGTGLRLLEAAaQSS  
5dzz. 1. A -----  
Target KGYSPYSVSGSGSTTGSrSGSRTGSrAGSRRGSFDATGSGfSMTfSSSSYSSSGYGRRYASGPTSSLGpESAAa  
5dzz. 1. A -----

| Model #10                                                                           | File | Built with    | Oligo-State | Ligands | GMQE | QMEANDisCo Global |
|-------------------------------------------------------------------------------------|------|---------------|-------------|---------|------|-------------------|
| 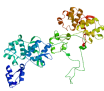 | PDB  | ProMod3 3.3.0 | monomer     | None    | 0.00 | 0.59 ± 0.05       |

| Template | Seq Identity | Oligo-state | QSQE | Found by | Method | Resolution | Seq Similarity | Range       | Coverage | Description |
|----------|--------------|-------------|------|----------|--------|------------|----------------|-------------|----------|-------------|
| 5dzz.1.A | 38.07        | monomer     | 0.00 | HHblits  | X-ray  | 2.60Å      | 0.38           | 3888 - 4476 | 0.11     | Desmoplakin |

The template contained no ligands.

Target MSGEDQEVRAVVEDGSNGGSGSPSGDTLPWNLEKTQRSRRGGGGPGNGSVLDPaERAVIRIADERDRVQKKTfTKWVN  
5dzz. 1. A -----  
Target KHLIKAQRHISDLyEDLRdGHNLISLLEVLSGDSLPREKGRMRfHKLQNVQIAlDYLRHRQVKLVNIrNDIDIADGNPKLT  
5dzz. 1. A -----  
Target LGLIWtIILHFQISDIQVSGQSEDMtAKEKLLWSQRMVEGYQGLRCdNFTSSWRDGRlFNaiIHRHKPMLIDMNkVYRQ  
5dzz. 1. A -----  
Target TNLENLDQAFSVAERDLGVTRLLDPEDVDVPQpDEKSIITyVSSLYDAMPRVpDVQDGvKANELQLRWQeYRELvLLLLQ  
5dzz. 1. A -----  
Target WIRAHTAAFEERRFPSSFEeIEILWCfLKFkETELPAKEADKNRSKGIYQSLegAVQAGQLKvPPGYHPLDVEKEWgKL

5dzz. 1. A -----  
Target HVAILEREKQLRSEFERLERLQRIVSKLQMEAGLCEEQLNQADALLQSDVRLLAAGKAPQRAGEVERDLKADGMIRLLF  
5dzz. 1. A -----  
Target NDVQALKDGRHPQGEQMYRRVYRLHERLVAIRTEYNLRLRGTPRHPELEDSTLRYLQDLLAWVEENQRRVDSAEWGVDLP  
5dzz. 1. A -----  
Target SVEAQLGSHRGLHQSVEEFRAKIERARTDEGQLSPATRGAYRDCLGRDLQYAKLLNSSKARLSLESLHGFVAAATKEL  
5dzz. 1. A -----  
Target MWLSEKEEEEVGFWDWSEKSNMAAKKEAYSALMRELELKEKKIKEIQSTGDRLLREDHPPARPTVESFQAALQTQWSWMLQ  
5dzz. 1. A -----  
Target LCCCIEAHLKENTAYFQFFSDVREAEELRKLQETLHRKYTCDRSITVTRLEDLLQDAQDEKQQLNEYRGHLSGLAKRAK  
5dzz. 1. A -----  
Target AIVQLTPRNPTQPTRGRVPLLAVCDYKQVEATVHKGDECQMLGPAQPPHVKVLSSSGSEAAVPSVCFLVPPPNQEALEAV  
5dzz. 1. A -----  
Target ARLEAQHQALVTLWHQLHTDMKSLLAWQSLSRDVQLIRSWSLVTFRTLKPEEQRQALRSLELHYQAFLRDSQDAGGFGPE  
5dzz. 1. A -----  
Target DRLQAEREYGSCSRHYQQLLSLEQGEQEESRCQRCISELKDIRLQLEACETRIVHRLRLPLDKEPARECAQRIAEQQKA  
5dzz. 1. A -----  
Target QAEVEGLGKGVARLSAEAEKVLALPEPSPAAPTLRSELELTGKLEQVRSLSAIYLEKLKTIISLVIRSTQGAEELRAHE  
5dzz. 1. A -----  
Target EQLKEAQAVPAALPELEATKAAMKKLRAQAEAAQPVFDALRDELGAQEVGERLQQRHGERDVEVERWRERVTLLELRWQ  
5dzz. 1. A -----  
Target AVLAQTDVRQRELEQLGRQLRYRESADPLGAWLQDARRRQEIQAVPLADSQAVREQLRQEKALLEIERHAEKVEECQ  
5dzz. 1. A -----  
Target RFAKQYINAIKDYLQLVTYKAQLEPVASPAKKPKVQSGSESVIQEYVDLRTRYSELSTLTSQYIRFISETLRRMEEEER  
5dzz. 1. A -----  
Target LAEQQRAEERERLAEVEAALEKQRQLAEHAQAKAQAEAEQELQRRMQEEVARREEVAVDAQQQKRSIQEELQQLRQSS  
5dzz. 1. A -----  
Target EAEIQAQARQVEAAERSRLRIEEEIRVVRLQLETTERQRGGAEGELQALRAREEAEQKRQAQEEAERLRRQVQEETQR  
5dzz. 1. A -----  
Target KRQAEELGLRVKAEAEAREKQRALQALEELRLQAEAAERRLRQAEAEERARQVQVALETAQRSAQELQSKHASFAEKT  
5dzz. 1. A -----  
Target AQLERTLEEEHVTVVQLREEATRREQQAEAEERAREEAERELERWQLKANEALRLRLQAE EVAQQKSLAQAEAEKQKEAA  
5dzz. 1. A -----  
Target EREARRRGKAEQAVRQRELAEQELERQRLAEGTAQQLAAEQELIRLRAETEQGEQQRQLLEEELARLQSEAAAAATQK  
5dzz. 1. A -----  
Target RQELEAELAKVRAEMEVLLASKARAEESRSSEKSKRLEAEAGRFRELAEEAARLRALAEAAKRQRQLAEEDAARQRA  
5dzz. 1. A -----  
Target EAERVLSEKLA AIS EATRLKTEAEIALKEKEAENERLRLRAEDEAFQRRRLEEQAQHKADIEERLAQLRKASESELERQ  
5dzz. 1. A -----  
Target KGLVEDTLRQRRQVEEELALKASFEEKAAAGKAELELELGRIRGNAEDTLRSKEQAEQEAARQRQLAAEEERRRREAER  
5dzz. 1. A -----  
Target VQKSLAEEEEAARQRKAAL EEVERLKAKVEEARRLRERAEHESVRQLQLAQEAQKRLQAEKHAFAVQQKEQELQOTL  
5dzz. 1. A -----  
Target QQEQSVLEKL RSEAEAAARRAAEEAEERARAEREAQSRQRVEEAERLQAAEEQAQAQAQAAAEKL RKEAEQEAAARR  
5dzz. 1. A -----  
Target AQAEQAALRQKQAADAEMEKHKFAEQTLRQKAQVEQELTALRLKLEETDHQKSILDQELQRLKA EVTEAARQRSQVEEE  
5dzz. 1. A -----  
Target LFSVRVQMEELGKLKARIEAENRALILRDKDNTQRLLQEEAEKMKQVAEEAARLSVA AQEAARLRQLAEEDLAQQRALAE  
5dzz. 1. A -----

Target 5dzz. 1. A KMLKEKMQAVQEATRLKAEAEELLQQQKELAQEQARRLQEDKEQMAQQLAQETQGFQRTLETERQRQLEMSAEAEERLRLRV-----

Target 5dzz. 1. A AEMSRAQARAEDAQRFRKQAEIEGAKLHRTTELATQEKVTLVQTLETQRQQSDRDADRLREATAELEREKDKLKKEAEELL-----

Target 5dzz. 1. A QLKSEEMQTVQQEQLLQETQALQQSFLSEKDSLLQRRERFIEEEKAKLERLFQDEVAKAQKLREEQQRQQQQMQQEKQQL-----

Target 5dzz. 1. A ASMEEARRRQHEAEEGVRRKQEELQLEEQRRQQEQLLAEENRRLRERLEHLEEEHRAALAHSEEITAAQAAATRALPNG-----

Target 5dzz. 1. A QDAADGPAAEPEHAFEGLRQKVPAAQLQEAGILSTEELQRLAQGHTTVAELTQREDVRRYLQGHSSIAGLLLPANEKLT-----

Target 5dzz. 1. A IYAALRRQLSPGTALILLEAQAAASGFLDPVRNRRLTVTEAVKEGVVGPPELHHKLLSAERAVTGYKDPYTGEKISLFAQ-----

Target 5dzz. 1. A MKKDLIVREHGIRLLEAQIATGGVIDPVHSHRVPVDVAYHRGYFDEEMNRVLQDPSDDTKGFFDPNTHENLTYLQLLERC-----

Target 5dzz. 1. A VEDPETGLRLLPLTDQAAKGELVYTDSEARDVFEKATVSAPFGKFQGKTVTIWELINSEYFTAEQRRDLLRQFRTGKVT-----

Target 5dzz. 1. A VEKIIKIVITVIEEHEQKGQLCFQGLRALVPAELLESGIIDWDLFRQLQLGERSVQEVAEVEGVRRALRGSGVIAGVWL-----

Target 5dzz. 1. A EEARQKLSIYEALKKELLQPEAAVALLEAQAGTGHVIDPAT SARLTVDEAVRAGLVGPPELHEKLLSAEKAVTGYKDPYSG-----

Target 5dzz. 1. A QSVSLFQALKKGLIPREQGLRLDAQLSTGGTVDPSPKSHRPLDVCARGYLDEETSTALSAPRDDAKTYYPDRTWELAT-----

Target 5dzz. 1. A YSQLQQCRPDPLTGLSLLPLSEEAARARQQELYSEVQAREAFQKATVEVPVGSFQGRAVTIWELINSEYFTAEQRQELL-----

Target 5dzz. 1. A RQFRTGKVTVEKIIKIVITIVEEVETTRRERLSFSGLRAPVPASELLAAGILSSSQFEQLKD GKTSVKDLSELSSLQTL-----

Target 5dzz. 1. A QGSGCLAGIYLESKEKVTIYEAMRRGLLRPSTAILLLEAQATGFLVDPVRNQRLYVHEAVKAGVVGPELHEKLLSAEK-----

Target 5dzz. 1. A AVTGYKDPYSGSTISLFQAMKKGLVVREHGIRLLEAQIATGGIIDPVHSHRVPVDVACQRGYFDEEMNRVLEDPSDDTKG-----

Target 5dzz. 1. A FFDPNTHENLTYRQLLERCVEDPETGLRLLPLKGPEKAEVVETTRVYTEETTRA FEETQIDIPGGGSHGGSTMSLWEVM-----

Target 5dzz. 1. A QSDLIPEEQRAQLMADFQAGRVTKERMIIIIIEIEKTEIVRQQNLASYDYVRRRLTAEDLYEARVISRESYSLLREGTR-----

Target 5dzz. 1. A SLREVLEAESAWRYLYGTGCVAGVYLPGSRQTLPIYQALKKGLLSAEVARLLLEAQATGFLDPVKGERLTVDEAVRKG-----

Target 5dzz. 1. A LVGPPELHDLRLSAERAVTGYRDPYTEQTISLFQAMKKDLIPAEALRLLDAQLATGGIVDPRLGFHLPLEVAYQRGYLNK-----

Target 5dzz. 1. A DTHDQLSEPSEVRSYVDPSTDERLSYTLQLLRCRRDETSGFLPLSEARKLTFRGLRKQITVEELVRSHVMDEATAQRL-----DTSKLVFDGLRKKVTAMQLYECQLIDKTTLDKL

Target 5dzz. 1. A QEGLTSIEEVSKNLQKFLEGTSSIAGVLVDATKERLSVYQAMKKGIIRPGTAFELLEAQATGYVIDPIKGLKLTVEEAVLKGKKSVEEVASEIQPFRLRGAGSIAGAS-ASPKEKYSLVAEKRKKLISPESTVMLEAQATGGIIDPHRNEKLTVDSAI

Target 5dzz. 1. A RMGIVGPEFKDKLLSAERAVTGYKDPYSGKLISLFQAMKKGLILKDHGIRLLEAQIATGGIIDPEESHRLPVDVAYQRGLARDLIDFDDRQQIYAAEKAITGFDDPFSGKTVSVSEATKKNLIDRETGMRLLEAQIASGGVVDPVNSVFLPKDVALARGL

Target 5dzz. 1. A FDEEMNEILTDPSDDTKGFFDPNTEENLTYLQLMERCVTDPQTGLRLLPLKEKKRERKTSKSSSVRKRVRVIDVPETGKEIDRDLYRSLNDPRDSQKNFVDPVTKKVSYVQLKERCRIEPTGLLLLSVQKRSM-----SFQG----

Target 5dzz. 1. A MSVYEAYRKGLIDHQTYLELSEQECEWEEITISSSDGVVKSMIIDRRSGRQYDIDEAIAKSLIDRSALDQYRAGTLSITE-----IRQPVTVTELVDSGILRPSTVNELESGQISYDE

Target 5dzz. 1. A FADMLSGNAGGFRSRSSSVGSSSSYPISPAVSRTLASWSDPTEETGPVAGILDDETLEKVSITEAMHRNLVDNITGQRLVGER-----IKDFLQGSSCIAGIYNETTKQKLGIYEAMKIGLVRPGTALEL



Target LEAQAQTGGIIDPNTGERFPVTDVANKGLVDKIMVDRINLAQKAFCGFEDPRTKTKMSAAQALKKGWLYYEAGQRFLEVQ  
5dzz. 1. A LEAQAATGFIVDPVSNLRLPVVEAYKRGLVGIEFKEKLLSAERAVTGYNDPETGNIISLFQAMNKELIEKGHGIRLLEAQ

Target YLTGGLIEPDTGRVPLDEALQRGTVDARTAQKL RDVSAYS KYLTCPKTKLKISYKDALDRSMVEEGTGLRLLEAAAQSS  
5dzz. 1. A IATGGIIDPKESHRLPVDIAYKRGYFNEELSEILSDPSDDTKGFFDPNTEENLTYLQLKERICKDEETGLCLLPLK----

Target KGYSPSPYSVSGSGSTTGSRSRGTGSRAGSRRGSFDTGSGFSMTFSSSSYSSSGYGRRYASGPTSSLGGPESAAA  
5dzz. 1. A -----

| Model #13                                                                         | File | Built with    | Oligo-State                   | Ligands | GMQE | QMEANDisCo Global |
|-----------------------------------------------------------------------------------|------|---------------|-------------------------------|---------|------|-------------------|
|  | PDB  | ProMod3 3.3.0 | monomer (matching prediction) | None    | 0.00 | 0.62 ± 0.05       |

| Template | Seq Identity | Oligo-state | QSQE | Found by | Method | Resolution | Seq Similarity | Range    | Coverage | Description                               |
|----------|--------------|-------------|------|----------|--------|------------|----------------|----------|----------|-------------------------------------------|
| 6s17.1.A | 27.80        | homo-dimer  | 0.00 | HHblits  | X-ray  | 3.30Å      | 0.35           | 63 - 480 | 0.09     | Calponin homology domain protein putative |

The template contained no ligands.

Target MSGEDQEVRAVVEDGSNGGSGSPSPGDTLPWNLEKTQRSRRGGGGPGNGSVLDPAERAVIRIADERDRVQKKTFTKWVN  
6s17. 1. A -----LVAQWEKVQIKTFTKWVN

Target KHLIKAQRHISDLYEDLRDGHNLISLLEVLSGDSLPR-EKGRMRFHKLQNVQIALDYLRHRQVKLVNIRNDDIADGNPKL  
6s17. 1. A MHLAKKGRKINDVTTDFKNGVELCALLEIIGETTICKVTNPKMRIQMTENLDKALRFIQSRDVKLTGIGPTDIVDGNVKL

Target TLGLIWTIILHFQISDIQVSGQSEDMTAKELLLLWSQRMVEGYQGLRCDNFTSSWRDGRLFNAIIHRHKPMLIDMNKVYR  
6s17. 1. A TLGLVWTLILRFAISELSAE----GLSAKQGLLLWCQKKCEPYP-VKVENFSESFKDGKVFICALIHRHRPDLLDWETVGE

Target QTNLENLDQAFSVAERDLGVTRLLDPEDVDV-PQPDEKSIITYVSSLYDAMPRPVDVQDGVK-----ANELQLRWQE  
6s17. 1. A -DDRANLEKAFDVAEKELGIPKLLDVDDIVNMPRPDERSVMTYVAALYKVFSSNDQVEKAGKRAGNFLDLLRATEGMVHD

Target YRELVLLLLQWIRAHTAAFEERRFPSSFEEIEILWCQFLKFKETELPAKEADKNRSGIYQSLEGAVQAG---QLKVPPG  
6s17. 1. A YEQRAQALKENIEAAINKMNGVEPSDEYHQVEQINETKNYRKGDKRAFIKEQGDLATLFGQINSKLRGMKRPVYVAPEG

Target YHPLDVEKEWGKLVHAILEREKQLRSEFERLERLQRIVSKLQMEAGLCEEQLNQADALLQSDVRLLAAGKAPQRAGEVER  
6s17. 1. A LDPKSLEGYIANISEAERALRSKLNTAMR--NCLIALRKAFADPANATDAKINEYRTFVTDETSEAPLEEQVATLKAKLE

Target DLDKADGMIRLLFNDVQALKDGRHPQGEQMYRRVYRLHERLVAIRTEYNLRLRGTPRHPELEDSTLRYLQDLLAWVEENQ  
6s17. 1. A ELKQVEAQLPPIE-----

Target RRVDSAEWGVDLPSVEAQLGSHRGLHQSVEEFRAKIERARTDEGQLSPATRGAYRDCLGRDLQYAKLLNSSKARLSLE  
6s17. 1. A -----

Target SLHGFVAAATKELMWLSEKEEEEVGFWDSESNMAAKKEAYSALMRELELKEKKIKEIQSTGDRLLREDHPARPTVESF  
6s17. 1. A -----

Target QAALQTQWSWMLQLCCCIEAHLKENTAYFQFFSDVREAEELRKLQETLHRKYTCDRSITVTRLEDLLQDAQDEKDQLNE  
6s17. 1. A -----

Target YRGHLSGLAKRAKAIVQLTPRNPTQPTRGRVPLLAVCDYKQEATVHKGDECQMLGPAQPFHWKVLSSSGSEAAVPSVCF  
6s17. 1. A -----

Target LVPPPNQEALEAVARLEAQHQALVTLWHQLHTDMKSLLAWQSLSRDVQLIRSWSLVTFRTLKPEEQRQALRSLELHYQAF  
6s17. 1. A -----

Target LRDSQDAGGFGPEDRLQAEREYGSCSRHYQQLLSLEQGEQEESRCQRCISELKDIRLQLEACETRTRVHRLRLPLDKEPA  
6s17. 1. A -----

Target RECAQRIAEQQAQAEVEGLGKGVARLSAEAEKVLALPEPSPAAPTLRSELELTGKLEQVRSLSAIYLEKLKTIISLVIR  
6s17. 1. A -----

Target STQGAEELRAHEEQLEAQAVPAALPELEATKAAMKKLRAQAEQQPVFDALRDELRGAEVGERLQQRHGERDVEVER  
6s17. 1. A -----

|                    |                                                                                             |
|--------------------|---------------------------------------------------------------------------------------------|
| Target<br>6s17.1.A | WRERVTLLERWQAVLAQTDVRQRELEQLGRQLRYYRESADPLGAWLQDARRRQEQIQAVPLADSQAVREQLRQEKALLE<br>-----    |
| Target<br>6s17.1.A | EIERHAEKVEECQRFQAKQYINAIKDYLQLVITYKAQLEPVASPAKKPKVQSGSESVIQEYVDLRTRYSELSTLTSQYIRF<br>-----  |
| Target<br>6s17.1.A | ISETLRRMEEEEERLAEQQRAEERERLAEVEAALEKQRQLAEHAQAKAQAEREAQELQRRMQEEVARREEVAVDAQQQKR<br>-----   |
| Target<br>6s17.1.A | SIQEELQQLRQSSEAEIQAKARQVEAAERSRLRIEEEEIRVVRLQLETTERQRGGAEGELQALRARAEAEAKRQAQEEA<br>-----    |
| Target<br>6s17.1.A | ERLRRQVQEETQRKRQAEAEGLRVKAEAAAREKQRALQALEELRLQAEAAERRLRQAEAEERARQVQVALETAQRSQAQ<br>-----    |
| Target<br>6s17.1.A | ELQSKHASFAEKTAQLERTLEEEHVTVVQLREEATRREQQAEAEERAREEAERELERWQLKANEALRLRLQAE EVAQQKS<br>-----  |
| Target<br>6s17.1.A | LAQAEAEKQKEAAEREARRRGKAEQAVRQRELAEQELERQRQLAEGTAQQRLAAEQELIRLRAETEQGEQQRQLLEEL<br>-----     |
| Target<br>6s17.1.A | ARLQSEAAAAATQKRQELEAEALAKVRAEMEVLLASKARAEESRSSEKSKRLEAEAGRFRELAEEAARLRALAEAAKRQ<br>-----    |
| Target<br>6s17.1.A | RQLAEEDAARQRAEAERVLSEKLAAISEATRLKTEAEIALKEKEAENERLRRLAEDEAFQRRRLEEQAQHKADIEERLA<br>-----    |
| Target<br>6s17.1.A | QLRKASESELERQKGLVEDTLRQRRQVEEEILALKASFEEAAAGKAELELELGRI RNAEDTLRSKEQAEQEAARQRQLA<br>-----   |
| Target<br>6s17.1.A | AEEERRRREAEEERVQKSLAAEEEAARQRKAALEEVEERLKAKVEEARRLRERAEHESVRQLQLAQEAAQKRLQAEKHAHF<br>-----  |
| Target<br>6s17.1.A | AVQQKEQELQQTLLQEQSVLEKLRSEAEAAARRAAEEAEARERAEREAAQSRQRVEEAERLKQAAEEQAQAQAQAAAAE<br>-----    |
| Target<br>6s17.1.A | KLRKEAEQEAAARRAQAEQAALRQKQAADAEMEKHKKF AEQTLRQKAQVEQELTALRLKLEETDHQKSILDQELQRLKAEV<br>----- |
| Target<br>6s17.1.A | TEAARQRSQVEEELFSVRVQMEELGKLKARIEAENRALILRDKDNTQRLQEEAEKMKQVAEEAARLSVAQEAARLRQL<br>-----     |
| Target<br>6s17.1.A | AEEDLAQQRALAEKMLKEKMQAVQEATRLKAEALLQQQKELAQEQARRLQEDKEQMAQQLAQETQGFQRTLETERQRQL<br>-----    |
| Target<br>6s17.1.A | EMSAEERLRLRVAEMSRAQARAEDAQRFRKQAEIIGAKLHRTLATQEKVTLVQTLETQRQQSDRDADRLREIAELE<br>-----       |
| Target<br>6s17.1.A | REKDKLKKEAELLQLKSEEMQTVQQEQLLQETQALQQSFLSEKDSLLQRERFIEEEKAKLERLFQDEVAKAKLREEQQR<br>-----    |
| Target<br>6s17.1.A | QQQQMQQEKQQLLASMEEARRRQHEAEEGVRRKQEELQLLEQQRQQQEQLLAEENRRLRERLEHLEEHRAALAHSEIIT<br>-----    |
| Target<br>6s17.1.A | AAQAAATRALPNGQDAADGPAAEPEHAFEGLRQKVPAAQLQEAGILSTEELQRLAQGHTTVAELTQREDVRRYLQGHSSI<br>-----   |
| Target<br>6s17.1.A | AGLLLPANEKLTIIYAALRRQLLSPGTALILLEAQAAASGFLDPVRNRRLTVTEAVKEGVVGPPELHHKLLSAERAVTGYK<br>-----  |
| Target<br>6s17.1.A | DPYTGEKISLFQAMKKDLIVREHGIRLLEAQIATGGVIDPVHSHRVPVDVAYHRGYFDEEMNRVLQDPSDDTKGFFDPNT<br>-----   |
| Target<br>6s17.1.A | HENLTYLQLLERCVDPETGLRLLPLTDQAAKGELVYTDSEARDVFEKATVSAPFGKFQGKTVTIWELINSEYFTAQR<br>-----      |
| Target<br>6s17.1.A | RDLLRQFRTGKVTVEKIIKIVITVIEEHEQKGQLCFQGLRALVPAELLESGLIDWDLFRQLQLGERSVQEVAEVEGVRR<br>-----    |
| Target<br>6s17.1.A | ALRGSGVIAGVWLEEARQKLSIYEALKKELLQPEAAVALLEAQAGTGHVIDPAT SARLTVDEAVRAGLVGPPELHEKLLSA<br>----- |
| Target             | EKAVTGYKDPYSGQSVSLFQALKKGLIPREQGLRLDDAQLSTGGTVDPKSHRPLDVCARGYLDEETSTALSAPRDDA               |

6s17. 1. A -----  
Target KTYYPRTWELATYSQLQQCRPDPLTGLSLLPLSEEAARARQQELYSEVQAREAFQKATVEVPVGSFQGRAVTIWELIN  
6s17. 1. A -----  
Target SEYFTAERQELLRQFRTGKVTVEKIIKIVITIVEEVETRRERLSFSGLRAPVPASELLAAGILSSSQFEQLKDGKTSV  
6s17. 1. A -----  
Target KDLSELSSLQTLQSGCLAGIYLESKEKVTIYEAMRRGLLRPSTAILLLEAQAATGFLVDPVRNQRLYVHEAVKAGV  
6s17. 1. A -----  
Target GPHELHEKLLSAEKAVTGYKDPYSGSTISLFQAMKKGLVVREHGIRLLEAQIATGGIIDPVHSHRVPVDVACQRGYFDEEM  
6s17. 1. A -----  
Target NRVLEDPDDTKGFFDPNTHENLTYRQLLERCVDPETGLRLLPLKGPEKAEVVETTRVYTEETTRAFFETQIDIPGGG  
6s17. 1. A -----  
Target SHGGSTMSLWEVMQSDLIPEEQRAQLMADFQAGRVTKERMIIIIIEIEKTEIVRQQNLASYDYVRRRLTAEDLYEARVI  
6s17. 1. A -----  
Target SRESYSLLREGTRSLREVLEASAWRYLYGTGCVAGVYLPGSRQTLPIYQALKKGLLSAEVARLLLEAQAATGFLDPVK  
6s17. 1. A -----  
Target GERLTVDEAVRKGLVGPETHDRLLSAERAVTGYRDPYTEQTISLFQAMKKDLIPAEALRLDAQLATGGIVDPRLGFHL  
6s17. 1. A -----  
Target PLEVAYQRGYLNKDTHDQLSEPSEVRSYVDPSTDERLSYQQLRRCRDETSGLFLLPLSEARKLTFRGLRKQITVEELV  
6s17. 1. A -----  
Target RSHVMDEATAQRLQEGLTSIEEVSKNLQKFLEGTSSIAGVLVDATKERLSVYQAMKKGIIRPGTAFELLEAQAATGYVID  
6s17. 1. A -----  
Target PIKGLKLTVEEAVRMGIVGPEFKDKLLSAERAVTGYKDPYSGKLISLFQAMKKGLIKDHGIRLLEAQIATGGIIDPEES  
6s17. 1. A -----  
Target HRLPVDVAYQRLGFDEEMNEILTDPDDTKGFFDPNTEENLTYLQLMERCVTDPQTGLRLLPLKEKKRERKTSKSSVRK  
6s17. 1. A -----  
Target RRVVIDPETGKEMSVEYAYRKGLIDHQTYLELSEQECWEIEITISSDGVVKSMIIDRRSGRQYDIDEAIAKSLIDRSA  
6s17. 1. A -----  
Target LDQYRAGTLSITEFADMLSGNAGGFRSRSSSVGSSSSYPISPAVSRTQLASWSDPTEETGPVAGILDTETLEKVSITEAM  
6s17. 1. A -----  
Target HRNLVDNITGQRLLEAQAQCTGGIIDPNTGERFPVTDVANKGLVDKIMVDRINLAQKAFCGFEDPRTKTKMSAAQALKKGW  
6s17. 1. A -----  
Target LYYEAGQRFLEVQYLTGGLIEPDTGRVPLDEALQRGTVDARTAKLRDVSAYSKYLTCPKTKLKISYKDALDRSMVEEG  
6s17. 1. A -----  
Target TGLRLLLEAAAQSSKGYSPYSVSGSGSTGSRSGSRTGSRAGSRRGSFDATGSGFSMTFSSSSYSSSGYGRRYASGPTSS  
6s17. 1. A -----  
Target LGGPESAAA  
6s17. 1. A -----

| Model #19                                                                           | File | Built with    | Oligo-State | Ligands | GMQE | QMEANDisCo Global |
|-------------------------------------------------------------------------------------|------|---------------|-------------|---------|------|-------------------|
|  | PDB  | ProMod3 3.3.0 | monomer     | None    | 0.00 | 0.72 ± 0.05       |

| Template | Seq Identity | Oligo-state | QSQE | Found by | Method | Resolution | Seq Similarity | Range     | Coverage | Description |
|----------|--------------|-------------|------|----------|--------|------------|----------------|-----------|----------|-------------|
| 3pe0.1.A | 88.53        | monomer     | 0.00 | HHblits  | X-ray  | 2.95Å      | 0.58           | 626 - 899 | 0.06     | Plectin     |

Excluded ligands

| Ligand Name.Number | Reason for Exclusion       | Description |
|--------------------|----------------------------|-------------|
| CA.1               | Not in contact with model. | CALCIUM ION |

|                      |                                                                                                                                                                    |
|----------------------|--------------------------------------------------------------------------------------------------------------------------------------------------------------------|
| Target<br>3pe0. 1. A | MSGEDQEVRAVVEDGSNGGSGSPSPGDTLPWNLEKTQRSRRGGGGPGNGSVLDPAERAVIRIADERDRVQKKTFTKWVN                                                                                    |
| Target<br>3pe0. 1. A | KHLIKAQRHISDLYEDLRDGHNLISLLEVLSGDSLPREKGRMRFHKLQNVQIALDYLRHRQVKLVNIRNDDIADGNPKLT                                                                                   |
| Target<br>3pe0. 1. A | LGLIWTIILHFQISDIQVSGQSEDMTAKEKLLLSQRMVEGYQGLRCDNFTSSWRDGRLFNAIIHRHKPMLIDMNKVYRQ                                                                                    |
| Target<br>3pe0. 1. A | TNLENLDQAFSVAERDLGVTRLLDPEDVDVPQPDEKSIITYVSSLYDAMPRPVDVQDGVKANELQLRWQEYRELVLALLQ                                                                                   |
| Target<br>3pe0. 1. A | WIRAHTAAFEERRFPSSFEEIEILWCQFLKFKETELPAKEADKNRSKGIYQSLEGAVQAGQLKVPPTYHPLDVEKEWGKL                                                                                   |
| Target<br>3pe0. 1. A | HVAILEREKQLRSEFERLERLQRIVSKLQMEAGLCEEQLNQADALLQSDVRLLAAGKAPQRAGEVERDLKADGMIRLLF                                                                                    |
| Target<br>3pe0. 1. A | NDVQALKDGRHPQGEQMYRRVYRLHERLVAIRTEYNLRLRGTPRHPELEDSTLRYLQDLLAWVEENQRRVDSAEGVLDLP                                                                                   |
| Target<br>3pe0. 1. A | SVEAQLGSHRGLHQSVVEEFAKIERARTDEGQLSPATRGAYRDCLGRDLQYAKLLNSSKARLSLESLSHGFAAATKEL<br>-----RSLESLSHSFAAATKEL                                                           |
| Target<br>3pe0. 1. A | MWLSEKEEEEVGFWDSESNMAAKKEAYSALMRELELKEKKIKEIQSTGDRLLREDHDPARTVESFQAALQTQWSWMLQ<br>MWLNEKEEEEVGFWDSDRNTNMTAKKESYSALMRELELKEKKIKELQNAGDRLLREDHDPARTVESFQAALQTQWSWMLQ |
| Target<br>3pe0. 1. A | LCCCEIAHLKENTAYFQFFSDVREAEELRKLQETLHRKYTCDRSITVTRLEDLLQDAQDEKDQLNEYRGHLSGLAKRAK<br>LCCCEIAHLKENAAYFQFFSDVREAEGLQLQLQALRRKYSCDRSATVTRLEDLLQDAQDEKEQLNEYKGHLSGLAKRAK |
| Target<br>3pe0. 1. A | AIVQLTPRNPTQPTRGRVPLLAVCYDKQVEATVHKGDECQMLGPAQPFHWKVLSSSGSEAAVPSVCFLVPPPNQEALEAV<br>AVVQLKPRHPAHPMRGRPLLAVCYDKQVEVTVHKGDECQLVGPAQPSHWKVLSSSGSEAAVPSVCFLVPPPNQEAQEA |
| Target<br>3pe0. 1. A | ARLEAQHQALVTLWHQLHTDMKSLLAWQSLSRDVQLIRSWSLVTFRTLKPEEQRQALRSLELHYQAFRLDSQDAGGFGPE<br>TRLEAQHQALVTLWHQLHVDKM-----                                                    |
| Target<br>3pe0. 1. A | DRLQAEREYGSCSRHYQQLLSLEQGEQEESRCQRCISELKDIRLQLEACETRIVHRLRLPLDKEPARECAQRIAEQQKA                                                                                    |
| Target<br>3pe0. 1. A | QAEVEGLGKGVARLSAEAEKVLALPEPSPAAPTLRSELELTGKLEQVRSLSAIYLEKLKLTISLVIRSTQGAEELRAHE                                                                                    |
| Target<br>3pe0. 1. A | EQLKEAQAVPAALPELEATKAAMKKLRAQAEAAQPVFDALRDELRGAEVGERLQQRHGERDVEVERWRERVQTLLERWQ                                                                                    |
| Target<br>3pe0. 1. A | AVLAQTDVRQRELEQLGRQLRYRESADPLGAWLQDARRRQEIQIQAIVPLADSQAVREQLRQEKALLEEIERHAEKVEECQ                                                                                  |
| Target<br>3pe0. 1. A | RFAKQYINAIKDYLQLVITYKAQLEPVASPAKKPKVQSGSESVIQEYVDLRTYSELSTLTSQYIRFISETLRRMEEER                                                                                     |
| Target<br>3pe0. 1. A | LAEQQRAEERERLAEVEAALEKQRQLAEAHAQAKAQAEAEQELQRRMQEEVARREEVAVDAQQKRSIQEELQQLRQSS                                                                                     |
| Target<br>3pe0. 1. A | EAEIQAKARQVEAAERSRLRIEEEIRVVRLQLETTERQGGAEQELQALRARAEAEAKRQAQEEAERLRRQVQEETQR                                                                                      |
| Target<br>3pe0. 1. A | KRQAEAEGLRVKAEAEAREKQRALQALEELRLQAEAEERRLRQAEAEERARQVQVALETAQRSAAELQSKHASFAEKT                                                                                     |
| Target<br>3pe0. 1. A | AQLERTLEEEHVTVVQLREEATRREQQAEAEERAREEAERELERWQLKANEALRLRLQAEVAQQKSLAQAEAEKQKEAA                                                                                    |
| Target<br>3pe0. 1. A | EREARRRGKAEQAVRQRELAEQELERQRQLAEGTAQQLAAEQELIRLRAETEQQEQQRQLLEEELARLQSEAAAAATQK                                                                                    |
| Target<br>3pe0. 1. A | RQELEAEELAKVRAEMEVLASKARAEESRSSEKSKQRLAEAGRFRELAEEAARLRALAEAAKRQRQLAEEDAARQRA                                                                                      |

Target  
3pe0. 1. A EAERVLSEKLAAISEATRLKTEAEIALKEKEAENERLRRLAEDAEAFQRRRLEEQAQHKADIEERLAQLRKASESELERQ  
-----

Target  
3pe0. 1. A KGLVEDTLRQRRQVEEEILALKASFKEAAAGKAELELELGRIRGNAEDTLRSKEQAEQEAARQRQLAAEEERRRRREAEEER  
-----

Target  
3pe0. 1. A VQKSLAEEEEAARQRKAAL EEVERLKAKVVEARRLRERAHEHESVRQLQLAQEAAQKRLQAEKKAHAFVQQKEQLQQTL  
-----

Target  
3pe0. 1. A QQEQSVLEKLRSEAEARRAAEEAEERARAEREAAQSRQRVEEAERLKQAAEEQAQAQAQAAAEKLRKEAEQEAARR  
-----

Target  
3pe0. 1. A AQAEQAALRQKQAADAEMEKHKKFAEQTLRQKAQVEQELTALRLKLEETDHQKSILDQELQRLKAEVTEAARQRSQVEEE  
-----

Target  
3pe0. 1. A LFSVRVQMEELGKLKARIEAENRALILRDKDNTQRLLQEEAEKMKQVAEEAARLSVAAQEAARLRQLAEEDLAQQRALAE  
-----

Target  
3pe0. 1. A KMLKEKMQAVQEATRLKAEALLQQQKELAQEQARRLQEDKEQMAQQLAQETQGFQRTLETERQRQLEMSAEAERLRLRV  
-----

Target  
3pe0. 1. A AEMSRAQARAEEDAQRFRKQAEETGAKLHRTELATQEKVTLVQTLETQRQQSDRDADRLREATAELEREKDKLKKEAELL  
-----

Target  
3pe0. 1. A QLKSEEMQTVQQEQLLQETQALQQSFLSEKDSLLQRERFIEEEKAKLERLFQDEVAKAQLREEQQRQQQMQQEKQQLL  
-----

Target  
3pe0. 1. A ASMEEARRRQHEAEEGVRRKQEELQLLEQQRQQQEQLLAENRRRLRERLEHLEEEHRAALAHSEEITAAQAAATRALPNG  
-----

Target  
3pe0. 1. A QDAADGPAAPEHAFEGLRQKVPAAQLQEAGILSTEELQRLAQGHTTVAELTQREDVRRYLQGHSSIAGLLLKPANEKLT  
-----

Target  
3pe0. 1. A IYAALRRQLLSPGTALILLEAQAASGFLDPVRNRRLTVTEAVKEGVGPPELHHKLLSAERAVTGYKDPYTGEKISLFAQ  
-----

Target  
3pe0. 1. A MKKDLIVREHGIRLLEAQIATGGVIDPVHSHRVPVDVAYHRGYFDEEMNRVLQDPSDDTKGFFDPNTHENLTYLQLLERC  
-----

Target  
3pe0. 1. A VEDPETGLRLLPLTDQAAKGELVYTDSEARDVFEKATVSAPFGKFQGKTVTIWELINSEYFTAQRRDLLRQFRTGKVT  
-----

Target  
3pe0. 1. A VEKIIKIVITVIEEHEQKGQLCFQGLRALVPAELLESGIIDWDLFRQLQLGERSVQEVAEVEGVRRALRGSGVIAGVWL  
-----

Target  
3pe0. 1. A EEARQKLSIYEALKKELLQPEAAVALLEAQAGTGHVIDPATSARLTVDEAVRAGLVGPPELHEKLLSAEKAVTGYKDPYSG  
-----

Target  
3pe0. 1. A QSVSLFQALKKGLIPREQGLRLDDAQLSTGGTVDPKSHRPLDVACARGYLDEETSTALSAPRDDAKTYYPRTWELAT  
-----

Target  
3pe0. 1. A YSQLQQCRPDPLTGLSLLPLSEEAARARQQELYSEVQAREAFQKATVEVPVGSFQGRAVTIWELINSEYFTAQRRQELL  
-----

Target  
3pe0. 1. A RQFRTGKVTVEKIIKIVITVIEEVETTRRERLSFSGLRAPVPASELLAAGILSSSQFEQLKDGTSVKDLSELSSLQTL  
-----

Target  
3pe0. 1. A QGSGCLAGIYLESKEKVTIYEAMRRGLLRPSTAILLLEAQAATGFLVDPVRNQRLYVHEAVKAGVGPPELHEKLLSAEK  
-----

Target  
3pe0. 1. A AVTGYKDPYSGSTISLFAQMKGVLVREHGIRLLEAQIATGGIIDPVHSHRVPVDVACQRGYFDEEMNRVLEDPSDDTKG  
-----

Target  
3pe0. 1. A FFDPNTHENLTYRQLLERCVEDPETGLRLLPLKGPEKAEVVETTRVYTEETTRAFEETQIDIPGGGSHGGSTMSLWEVM  
-----

Target  
3pe0. 1. A QSDLIPEEQRAQLMADFQAGRVTKERMIIIIEIEKTEIVRQQNLASYDYVRRRLTAEDLYEARVISRESYSLLREGTR  
-----

Target  
3pe0. 1. A SLREVLEASAWRYLYGTGCVAGVYLPQSRQTLPIYQALKKGLLSAEVARLLLEAQAATGFLDPVKGERLTVDEAVRKG  
-----

Target  
3pe0. 1. A LVGPPELHDLRLSAERAVTGYRDPYTEQTIISLFAQMKGDLIPAEELRLLDAQLATGGIVDPRLGFHLPLEVAYQRGYLNK  
-----

Target  
3pe0. 1. A

DTHDQLSEPSEVRSYVDPSTDERLSYTLQLLRRCRRDETSGLFLLPLSEARKLTFRGLRKQITVEELVRSHVMDEATAQRL

Target  
3pe0. 1. A

QEGLTSIEEVSKNLQKFLEGTSSIAGVLVDATKERLSVYQAMKGIIRPGTAFELLEQAATGYVIDPIKGLKLTVEEAV

Target  
3pe0. 1. A

RMGIVGPEFKDKLLSAERAVTGYKDPYSGKLISLFQAMKGLILKDHGIRLLEAQIATGGIIDPEESHRLPVDVAYQRGL

Target  
3pe0. 1. A

FDEEMNEILTDPSDDTKGFFDPNTEENLYLQLMERCVTDPQTGLRLLPLKEKKRERKTSSKSSVRKRRVIVDPETGKE

Target  
3pe0. 1. A

MSVYEAYRKGLIDHQTYLELSEQECWEIEITISSSDGVVKSMIIDRRSGRQYDIDEAIAKSLIDRSALDQYRAGTLSITE

Target  
3pe0. 1. A

FADMLSGNAGGFRSRSSSVGSSSSYPISPAVSRTLASWSDPTEETGPVAGILDDETLEKVSITEAMHRNLVDNITGQRL

Target  
3pe0. 1. A

LEAQAQTGGIIDPNTGERFPVTDVANKGLVDKIMVDRINLAQKAFCGFEDPRTKTKMSAAQALKKGWLYYEAGQRFLEVQ

Target  
3pe0. 1. A

YLTGGLIEPDTPGRVPLDEALQRGTVDARTAQKL RDVSAYSKYLTCPKTKLKISYKDALDRSMVEEGTGLRLLEAAAQSS

Target  
3pe0. 1. A

KGYYSPPYSVSGSGSTTGSRSRGTGSRAGSRRGSFDTGSGFSMTFSSSSYSSSGYGRRYASGPTSSLGGPESAAA

| Model #09                                                                           | File | Built with    | Oligo-State | Ligands | GMQE | QMEANDisCo Global |
|-------------------------------------------------------------------------------------|------|---------------|-------------|---------|------|-------------------|
| 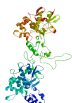 | PDB  | ProMod3 3.3.0 | monomer     | None    | 0.00 | 0.60 ± 0.05       |

| Template | Seq Identity | Oligo-state | QSQE | Found by | Method | Resolution | Seq Similarity | Range       | Coverage | Description |
|----------|--------------|-------------|------|----------|--------|------------|----------------|-------------|----------|-------------|
| 5dzz.1.A | 48.75        | monomer     | 0.00 | BLAST    | X-ray  | 2.60Å      | 0.43           | 2654 - 3223 | 0.11     | Desmoplakin |

The template contained no ligands.

Target  
5dzz. 1. A

MSGEDQEVRAVVEDGSNGGSGSPSPGDTLPWNLEKTQRSRRGGGGPGNGSVLDP AERAVIRIADERDRVQKKTFTKWVN

Target  
5dzz. 1. A

KHLIKAQRHISDLYEDLRDGHNLISLLEVLSGDSLPREKGRMRFHKLQNVQIALDYLHRHQVKLVNIRNDDIADGNPKLT

Target  
5dzz. 1. A

LGLIWTIILHFQISDIQVSGQSEDMTAKEKLLWSQRMVEGYQGLRCDNFTSSWRDGRLFNAIIHRHKPMLIDMNKVYRQ

Target  
5dzz. 1. A

TNLENLDQAFSVAERDLGVTRLLDPEDVDVPQDEKSIITYVSSLYDAMPRPVDVQDGVKANELQLRWQEYRELVL LLLQ

Target  
5dzz. 1. A

WIRAHTAAFEERRFPSSFEEIEILWCQFLKFKETELPAKEADKNRSKGIYQSLEGAVQAGQLKVPPGYHPLDVEKEWGKL

Target  
5dzz. 1. A

HVAILEREKQLRSEFERLERLRIVSKLQMEAGLCEEQLNQADALLQSDVRLLAAGKAPQRAGEVERDLKADGMIRLLF

Target  
5dzz. 1. A

NDVQALKDGRHPQGEQMYRRVYRLHERLVAIRTEYNLRLRGTPRHPELEDSTLRYLQDLLAWVEENQRRVDSA EWGVDLP

Target  
5dzz. 1. A

SVEAQLGSHRGLHQSVVEEFRAKIERARTDEGQLSPATRGAYRDCLGRDLQYAKLLNSSKARLSLES LHGFVAAATKEL

Target  
5dzz. 1. A

MWLSEKEEEEVGFWDSESNSMAAKKEAYSALMRELELKEKKIKEIQSTGDRLLREDHPARPTVESFQAALQTQWSWMLQ

|                      |                                                                                    |
|----------------------|------------------------------------------------------------------------------------|
| Target<br>5dzz. 1. A | LCCCIEAHLKENTAYFQFFSDVREAEELRKLQETLHRKYTCDRSITVTRLEDLLQDAQDEKDQLNEYRGHLSGLAKRAK    |
| Target<br>5dzz. 1. A | AIVQLTPRNPTQPTRGRVPLLAUCDYKQVEATVHKGDECQMLGPAQPFHWKVLSSSGSEAAVPSVCFLVPPPNQEALEAV   |
| Target<br>5dzz. 1. A | ARLEAQHQALVTLWHQLHTDMKSLLAWQSLSRDVQLIRSWSLVTFRTLKPPEEQRQALRSLELHYQAFLRDSQDAGGFGPE  |
| Target<br>5dzz. 1. A | DRLQAEREYGSCSRHYQQLLSLEQGEQESRCQRCISELKDIRLQLEACETRTRVHRLRLPLDKEPARECAQRIAEQQKA    |
| Target<br>5dzz. 1. A | QAEVEGLGKGVARLSAAEAKVLALPEPSPAAPTLRSELELTGKLEQVRSLSAIYLEKLTISLVIRSTQGAEELRAHE      |
| Target<br>5dzz. 1. A | EQLKEAQAVPAALPELEATKAAMKKLRAQAEAAQPVFDALRDELGAQEVGERLQQRHGERDVEVERWRERVQTLLERWQ    |
| Target<br>5dzz. 1. A | AVLAQTDVRQRELEQLGRQLRYRESADPLGAWLQDARRRQEQIQAVPLADSQAVREQLRQEKALLEIERHAEKVEECQ     |
| Target<br>5dzz. 1. A | RFAKQYINAIKDYLQLVTYKAQLEPVASPAKKPKVQSGSESVIQEYVDLRTRYSELSTLTSQYIRFISETLRRMEEEER    |
| Target<br>5dzz. 1. A | LAEQQRAEERERLAEVEAALEKQRQLAEAHQAQAQAEREAEQELQRRMQEEVARREEVAVDAQQKRSIQEELQQLRQSS    |
| Target<br>5dzz. 1. A | EAEIQAKARQVEAAERSRLRIEEEIRVVRLQLETTERQRGGAEGELQALRARAEAEAKRQAQEEAERLRRQVQEEETQR    |
| Target<br>5dzz. 1. A | KRQAEAEGLRVKAEAEAAAREKQRALQALEELRLQAEAEERRLRQAEAEERARQVQVALETAQRSQAELQSKHASFAEKT   |
| Target<br>5dzz. 1. A | AQLERTLEEEHVTVVQLREEATRREQQQAEAEERAREEAERELERWQLKANEALRLRLQAE EVAQQKSLAQAEAEKQKEAA |
| Target<br>5dzz. 1. A | EREARRRGKAEQAVRQRELAEQELERQRQLAEGTAQQLAAEQELIRLRAETEQGEQQRQLLEEELARLQSEAAAAATQK    |
| Target<br>5dzz. 1. A | RQELEAEALAKVRAEMEVLASKARAEESRSSEKSKRLEAEAGRFRELAEEAARLRALAEAAKRQRQLAEEDAARQRA      |
| Target<br>5dzz. 1. A | EAERVLSEKLAAISEATRLKTEAEIALKEKEAENERLRRLAEDEAFQRRRLEEQAQHKADIEERLAQLRKASESELERQ    |
| Target<br>5dzz. 1. A | KGLVEDTLRQRRQVEEELALKASFEEAAAGKAELELELGRIRGNAEDTLRSKEQAEQEAARQRQLAAEEERRRREAEER    |
| Target<br>5dzz. 1. A | VQKSLAAEEEAARQRKAAL EEVERLKAKEVEARRLRERAEHESVRQLQLAQEAAQKRLQAEKKAHAFVQQKEQELQQT    |
| Target<br>5dzz. 1. A | QQEQSVLEKLRS EAEARRAAEEAEARERAEERAAQSRQRVEEAERLKQAEEQAAQAAQAAAEKLRKEAEQEAARR       |
| Target<br>5dzz. 1. A | AQAEQAALRQKQAADAEMEKKHFAEQTLRQKAQVEQELTALRLKLEETDHQKSILDQELQRLKAEVTEAARQRSQVEEE    |
| Target<br>5dzz. 1. A | LFSVRVQMEELGKLKARIEAENRALILRDKDNTQRLLQEEAEKMKQVAEEAARLSVAAQEAARLRQLAEEDLAQQRALAE   |
| Target<br>5dzz. 1. A | KMLKEKMQAVQEATRLKAEAEELLQQQKELAQEQARRLQEDKEQMAQQLAQETQGFQRTLETERQRQLEMSAEERLRLRV   |
| Target<br>5dzz. 1. A | AEMSRAQARAEDAQRFRKQAEETGAKLHRTLATQEKVTLVQTLETQRQQSDRDADRLREATAELEREKDKLKKEAELL     |
| Target<br>5dzz. 1. A | QLKSEEMQTVQQEQLLQETQALQQSFLSEKDSLLQRERFIEEEKAKLERLFQDEVAKAQKLREEQQRQQQQMQQEKQQLL   |
| Target<br>5dzz. 1. A | ASMEEARRRQHEAEEGVRRKQEELQLLEQQRQQEQQLAEENRRLRERLEHLEEEHRAALAHSEEITAAQAAATRALPNG    |
| Target               | QDAADGPAAEPEHAFEGLRQKVPAAQLQEAGILSTEELQRLAQGHTTVAELTQREDVRRYLQGHSSIAGLLLPANEKLT    |

5dzz. 1. A -----VFDGLRKKVTAMQLYECQLIDKTTLDKLLKGKKSVEEVAS--EIQPFLRGAGSIAGASASP-KEKYS

Target IYAALRRQLLSPGTALILLEAQAASGFLLDPVRNRRLTVTEAVKEGVVGPPELHHKLLSAERAVTGYKDPYTGEKISLFAQ  
5dzz. 1. A LVEAKRKKLISPESTVMLLEAQAATGGIIDPHRNEKLTVDSAIARDLIDFDDRQQIYAAEKAITGFDDPFSGKTVSVSEA

Target MKKDLIVREHGIRLLEAQIATGGVIDPVHSHRVPVDVAYHRGYFDEEMNRVLQDPSDDTKGFFDPNTHENLTYLQLLERC  
5dzz. 1. A IKKNLIDRETGMRLLEAQIASGGVVDPVNSVFLPKDVALARGLIDRDLYRSLNDPRDSQKNFVDPVTKKKVSYVQLKERC

Target VEDPETGLRLLPLTDQAAKGGEVYTDSEARDVFEKATVSAPFGKFQG--KTVTIWELINSEYFTAEQRRDLLRQRTGK  
5dzz. 1. A RIEPHTGLLLSV-----QKRMS-----FQGIRQPVTVELVDSGILRPSTVNEL-----

Target VTVEKIIKIVITVIEEHEQKGQLCFQGLRALVPAELLESGLIIDWDLFRQLQLGERSVQEVAEVEGVRRALRGSGVIAGV  
5dzz. 1. A -----ESGQISYD-----EVGER-----IKDFLQGSSCIAGI

Target WLEEARQKLSIYEALKKELLQPEAAVALLEAQAAGTGHVIDPATSARLTVDEAVRAGLVGPPELHEKLLSAEKAVTGYKDPY  
5dzz. 1. A YNETTKQLGIYEAMKIGLVRPGTALELLEAQAATGFIVDPVSNLRLPVEEAYKRGLVGIEFKEKLLSAERAVTGYNDPE

Target SGQSVSLFQALKKGLIPREQGLRLDDAQLSTGGTVDPSPKSHRLPLDVACARGYLDEETSTALSAPRDDAKTYDPRTWEL  
5dzz. 1. A TGNIIISLFQAMNKELIEKHGIRLLEAQIATGGIIDPKESHRLPVDIAYKRGYFNEELSEILSDPSDDTKGFFDPNTEEN

Target ATYSQLQQQCRPDPLTGLSLLPLSEEAAARARQQELYSEVQAREAFQKATVEVPVGSFQGRAVTIWELINSEYFTAEQRQE  
5dzz. 1. A LTYLQLKERICKDEETGLCLLPLKE-----

Target LLRQFRTGKVTVEKIIKIVITIVEEVETRRERLSFSGLRAPVPASELLAAGILSSSQFEQLKDGTKSVKDLSELSSLQT  
5dzz. 1. A -----

Target LLQSGCLAGIYLESKEKVTIYEAMRRGLLRPSTAILLEAQAATGFLVDPVRNQRLYVHEAVKAGVVGPPELHEKLLSA  
5dzz. 1. A -----

Target EKAVTGYKDPYSGSTISLFQAMKKGLVREHGIRLLEAQIATGGIIDPVHSHRVPVDVACQRGYFDEEMNRVLEDPSDDT  
5dzz. 1. A -----

Target KGFFDPNTHENLTYRQLLERCVEDPETGLRLLPLKGPEKAEVVETTRVYTEETTRAFEETQIDIPGGGSHGGSTMSLWE  
5dzz. 1. A -----

Target VMQSDLIPEEQRAQLMADFQAGRVTKERMIIIIIEIEKTEIVRQQNLASYDYVRRRLTAEDLYEARVISRESYSLLREG  
5dzz. 1. A -----

Target TRSLREVLEAESAWRYLYGTGCVAGVYLPGRQTLPIYQALKKGLLSAEVARLLLEAQAATGFLLDPVKGERLTVDEAVR  
5dzz. 1. A -----

Target KGLVGPPELHDRLLSAERAVTGYRDPYTEQTISLFQAMKKDLIPAEELRLDDAQLATGGIVDPRLGFHLPLEVAYQRGYL  
5dzz. 1. A -----

Target NKDTHDQLSEPSEVRSYVDPSTDERLSYTLRRRCRRDETSGFLPLPLSEARKLTFRGLRKQITVEELVRSHVMDEATAQ  
5dzz. 1. A -----

Target RLQEGLTSIEEVSKNLQKFLEGTSSIAGVLVDATKERLSVYQAMKKGIIRPGTAFELLEAQAATGYVIDPIKGLKLTVEE  
5dzz. 1. A -----

Target AVRMGIVGPEFKDKLLSAERAVTGYKDPYSGKLISLFQAMKKGLILKDHGIRLLEAQIATGGIIDPEESHRLPVDVAYQR  
5dzz. 1. A -----

Target GLFDEEMNEILTDPSDDTKGFFDPNTEENLTYLQLMERCVTDPQTGLRLLPLKEKKRERKTSSKSSVRKRRVVIDPETG  
5dzz. 1. A -----

Target KEMSVYEAYRKGLIDHQTYLELSEQECEWEEITISSSDGVVKSMIIDRRSGRQYDIDEAIAKSLIDRSALDQYRAGTLSI  
5dzz. 1. A -----

Target TEFADMLSGNAGGFRRSSSVGSSSSYPISPAVSRTQLASWSDPTEETGPVAGILDTELEKVSITEAMHRNLVDNITGQ  
5dzz. 1. A -----

Target RLLEAQAQCTGGIIDPNTGERFPVTDVANKGLVDKIMVDRINLAQKAFCGFEDPRTKTKMSAAQALKKGWLYYEAGQRFLE  
5dzz. 1. A -----

Target VQYLTGGLIEPDTPGRVPLDEALQRGTVDARTAQKLRDVSAYS KYLTCPKTKLKS YKDALDRSMVEEGTGLRLLLEAAAQ  
5dzz. 1. A -----

Target SSKGYSPYSVSGSGSTTGSRSGRSRTGSRAGSRRGSFDTGSGFSMTFSSSSYSSSGYGRRYASGPTSSLGGPESAAA  
5dzz. 1. A -----



| Model #21                                                                         | File | Built with    | Oligo-State                   | Ligands | GMQE | QMEANDisCo Global |
|-----------------------------------------------------------------------------------|------|---------------|-------------------------------|---------|------|-------------------|
|  | PDB  | ProMod3 3.3.0 | monomer (matching prediction) | None    | 0.00 | 0.59 ± 0.05       |

| Template | Seq Identity | Oligo-state | QSQE | Found by | Method | Resolution | Seq Similarity | Range    | Coverage | Description     |
|----------|--------------|-------------|------|----------|--------|------------|----------------|----------|----------|-----------------|
| 4d1e.1.A | 25.11        | homo-dimer  | 0.00 | HHblits  | X-ray  | 3.50Å      | 0.33           | 65 - 738 | 0.15     | ALPHA-ACTININ-2 |

The template contained no ligands.

Target 4d1e. 1. A MSGEDQEVRAVVEDGSNGSGSPSPGDTLPWNLEKTQSRRRGGGPGNGSVLDPAERAVIRIADERDRVQKKTFTKWVN  
-----LLDPAWEKQQRKTFTAWCN

Target 4d1e. 1. A KHLIKAQRHISDLYEDLRDGHNLISLLEVLSGDSLPR-EKGRMRFHKLQNVQIALDYLHRHQVKLVNIRNDDIADGNPKL  
SHLRKAGTQIENIEEDFRNGLKMLLLEVISGERLPKPDRCGMRFHKIANVKNALDYIASKGVKLVSIGAEIIVDGNVKM

Target 4d1e. 1. A TLGLIWTIILHFQISDIQVSGQSEDMTAKEKLLWSQRMVEGYQGLRCDNFTSSWRDGRLFNAI IHRHKPMLIDMNKVYR  
TLGMIWTIILRFAIQDISVE----ETSAKEGLLLWCQRKTAPYRNVNIQNFHTSWKDGLGLCALIHRHRPDLIDYSKLNK

Target 4d1e. 1. A QTNLENLDQAFSVAERDLGVTRLLDPEDV-DVPQPDEKSIITYVSSLYDAMPVPDVQDGVK-----ANELQLRWQE  
DDPIGNINLAMEIAEKHLDIPKMLDAEDIVNTPKPDERAIMTYVSCFYHAFAGAEQAETAANRICKVLAVNGENERLMEE

Target 4d1e. 1. A YRELVLLLLQWIRAHTAAFEERRFPSSFEEIEILWCQFLKFKETELPAKEADKNRSKGIYQSLEGAVQAG---QLKVPPG  
YERLASELLEWIRRTIPWLENRTPAATMQAMQKKLEDFRDYRRKHKPPKVQEKQCLEINFNTLQTKLRISNRPAPMPSEG

Target 4d1e. 1. A YHPLDVEKEWGKLVHAILEREKQLRSEFERLERLRIVSKLQMEAGLCEEQLNQADALLQSDV----RLLAAGKAPQKQAG  
KMVSDIAGAWQRLQAEKGYEELLNEIRRLERLEHLAEKFRQKASTHETWAYGKEQILLQKDYESASLTEVRALLRKHE

Target 4d1e. 1. A EVERDLKADGMIRLLFNDVQALKDGRHPQGEQMYRRVYRLHERLVAIRTEYNL---RLRGTPRHP---ELEDSTLRYL  
AFESDLAAHQDRVEQIAAIAQELNELDYHDAVNVNDRCKIKCDQWDLGTLTQKRREALERMEKLLTIDQLHLEFAKRA

Target 4d1e. 1. A QDLLAWVEENQRRVDSAEGVDLPVSVEAQLGSHRGLHQSVVEEFAKIERARTDEGQL-----S---PATRGAYRDCLG  
APFNNWMEGAMEDLQDMFIVHSIEEIQSLITAHEQFKATLPEADGERQSIMAIQNEVEKVIQSYNIRISSNPYSTVTMD

Target 4d1e. 1. A RLDLQYAKLLNSSKARLSLES---L-----HGFVAAATKELMWLSEKEEEEVGFWDWERNNSMAAKKEAYSALMRE  
ELRTKWVKVQLVPIRDQSLQEELARQHANERLRRQFAAQANAIGPWIQNKMEETARSSIQ-ITGALEDQMNQLKQYEHN

Target 4d1e. 1. A LELKEKKIKEIQSTGDRLLREDHPARPTVESFQAALQTQWSWMLQLCCIEAHLKENTAYFFQFSDVREAEQRLKLQET  
IINYKKNIDKLEGDHQLIQEALVFDNKHTNYTMEHIRVGVWELLLTTIARTINEVETQILTRDA-----

Target 4d1e. 1. A LHRKYTCDRSITVTRLEDLLQDAQDEKDQLNEYRGHLSGLAKRAKAIIVQLTPRNPTQPTRGRVPLLAVCDYKQVEATVHK  
-----

Target 4d1e. 1. A GDECQMLGPAQPFHWKVLSSSGSEAAVPSVCFVPPPNQEALAEAVARLEAQHQALVTLWHQLHTDMKSLLAWQSLSRDVQ  
-----

Target 4d1e. 1. A LIRSWSLVTFRTLKPEEQRQALRSLELHYQAFRLRDSQDAGGFGPEDRLQAEREYGSCSRHYQQLQSLEQGEQESRCQR  
-----

Target 4d1e. 1. A CISELKDIRLQLEACETRIVHRLRLPLDKEPARECAQRIAEQQKAQAEVEGLGKGVARLSAEAEKVLALPEPSPAAPTLR  
-----

Target 4d1e. 1. A SELETLGKLEQVRSLSAIYLEKLKTIISLVIRSTQGAEALRAHEEQLEKAQAVPAALPELEATKAAMKKLRAQAEAAQP  
-----

Target 4d1e. 1. A VFDALRDELRGAEVGERLQQRHGERDVEVERWRERVTLQLERWQAVLAQTDVQRQRELEQLGRQLRYRESADPLGAWLQ  
-----

Target 4d1e. 1. A DARRRQEQIQAVPLADSQAVREQLRQEKALLEEIERHAEKVEECQRFQAKYINAIKDYELQLVITYKAQLEPVASPAKKPK  
-----

Target 4d1e. 1. A VQSGSESVIQEYVDLRTRYSELSTLSQYIRFISETLRRMEEEERLAEQQRAEERERLAEVEAALEKQRLAEAHAQAKA  
-----

Target 4d1e. 1. A QAEREAQELQRRMQEEVARREEVAVDAQQKRSIQEELQQLRQSSEAEIQAKARQVEAAERSRLRIEEEIRVVRLQLETT  
-----

|                      |                                                                                    |
|----------------------|------------------------------------------------------------------------------------|
| Target<br>4dle. 1. A | ERQRGGAEGELQALRARAEAEAKRQAQEEAERLRRQVQEETQKRQAEAEELGLRVKAEAEAAAREKQRALQALEELRLQ    |
| Target<br>4dle. 1. A | AEEAERRLRQAEAEERARQVQVALETAQRSQAELQSKHASFAEKTAQLERTLEEEHVTVVQLREEATRREQQQAERAR     |
| Target<br>4dle. 1. A | EAEERELERWQLKANEALRLRLQAE EVAQQKSLAQAEAEKQKEAAEREARRRGKAEQAVRQRELAEQELERQRQLAEGT   |
| Target<br>4dle. 1. A | AQQRLAAEQELIRLRAETEQGEQQRLLEEELARLQSEAAAATQKRQLEAEELAKVRAEMEVLLASKARAEESRSSEK      |
| Target<br>4dle. 1. A | SKQRLEAEAGRFRELAEEAARLRALAEAEKRQRQLAEEDAARQRAEAERVLSEKLAAISEATRLKTEAEIALKEKEAENE   |
| Target<br>4dle. 1. A | RLRRLAEDEAFQRRRLEEQAQHKADIEERLAQLRKASESELERQKGLVEDTLRQRRQVEEELALKASFEEKAAAGKAE     |
| Target<br>4dle. 1. A | ELELGRI RNAEDTLRSKEQAEQEAARQRQLAAEEERRRREAEEERVQKSLAAEEEAARQRKAAL EEVERLKAKVEEARRL |
| Target<br>4dle. 1. A | RERAEHESVRQLQLAQEAAQKRLQAEKKAHAFVQQKEQELQQTLLQQEQSVLEKL RSEAEAAARRAAEEAEERARAEREA  |
| Target<br>4dle. 1. A | AQSRQRVEEAERLKQAEEQAQAQAQAQAAAEKLRKEAEQEAARRAQAEQAALRQKQAADAEMEKHKKFAEQTLRQKAQV    |
| Target<br>4dle. 1. A | EQELTALRLKLEETHQKSILDQELQRLKAEVTEAARQRSQVEEELFSVRVQMEELGKLKARIEAENRALILRDKDNTQR    |
| Target<br>4dle. 1. A | LLQEEAEKMKQVAEEAARLSVAQAQAARLRQLAEEDLAQQRALAEKMLKEKMQAVQEATRLKAEAEELLQQQKELAQEQAR  |
| Target<br>4dle. 1. A | RLQEDKEQMAQQLAQETQGFQRTLETERQRQLEMSAEERLRLVAEMSRAQARAEEDAQFRKQAEIIGAKLHRTLAT       |
| Target<br>4dle. 1. A | QEKVTLVQTLETQRQQSDRDADRLREATAELEREKDKLKKEAEELLQLKSEEMQTVQQEQLLQETQALQQSFLSEKDSLLQ  |
| Target<br>4dle. 1. A | RERFIEEEKAKLERLFQDEVAKAQLREEQQRQQQMQQEKQQLASMEEARRRQHEAEEGVRRKQEELQLEQQRQQQE       |
| Target<br>4dle. 1. A | QLLAENRRRLRERLEHLEEEHRAALAHSEEITAAQAAATRALPNGQDAADGPAAEPEHAFEGLRQKVPAAQLQEAGILST   |
| Target<br>4dle. 1. A | EELQRLAQGHTTVAELTQREDVRRYLQGHSSIAGLLKPANEKLTIIYAALRRQLLSPGTALILLEAQASGFLDPVRNR     |
| Target<br>4dle. 1. A | RLTVTEAVKEGVGPPELHHKLLSAERAVTGYKDPYTGEKISLQFQAMKKDLIVREHGIRLLEAQIATGGVIDPVHSHRVPV  |
| Target<br>4dle. 1. A | DVAYHRGYFDEEMNRVLQDPSDDTKGFFDPNTHENLTYLQLLERCVEDPETGLRLLPLTDQAAKGELVYTDSEARDVFE    |
| Target<br>4dle. 1. A | KATVSAPFGKFQGKVTVTIWELINSEYFTAQRRDLLRQFRTGKVTVEKIIKIVITVIEEHEQKQLCFQGLRALVPAEL     |
| Target<br>4dle. 1. A | LESGIIDWDLFRQLQLGERSVQEVAEEGVRRALRGSGVIAGVWLEEARQKLSIYEALKKELLQPEAAVALLEAQAGTGH    |
| Target<br>4dle. 1. A | VIDPAT SARLTVDEAVRAGLVGPPELHEKLLSAEKAVTGYKDPYSGQSVSLFQALKKGLIPREQGLRLDDAQLSTGGTVDP |
| Target<br>4dle. 1. A | SKSHRLPLDVACARGYLDEETSTALSAPRDDAKTYYPRTWELATYSQLQQCRPDPLTGLSLLPLSEEAARARQQELY      |
| Target<br>4dle. 1. A | EVQAREAFQKATVEVPVGSFQGRAVTIWELINSEYFTAQRRQELLRQFRTGKVTVEKIIKIVITIVEEVETTRRERLSFS   |
| Target<br>4dle. 1. A | GLRAPVPASELLAAGILSSSQFEQLKDGKTSVKDLSSELSSLQTLQSGCLAGIYLESKEKVTIYEAMRRGLLRPSTAI     |
| Target               | LLLEAQATGFLVDPVRNQRLYVHEAVKAGVGPPELHEKLLSAEKAVTGYKDPYSGSTISLQFQAMKKGLVREHGIRLLE    |

4dle. 1. A

-----

Target

AQIATGGIIDPVHSHRVPVDVACQRGYFDEEMNRVLEDPSDDTKGFFDPNTHENLTYRQLLERCVEDPETGLRLLPLKGP

4dle. 1. A

-----

Target

EKAENVETTRVYTEETRRAFEETQIDIPGGGSHGGSTMSLWEVMQSDLIPEEQRAQLMADFQAGRVTKERMIIIIIEII

4dle. 1. A

-----

Target

EKTEIVRQQNLASYDYVRRRLTAEDLYEARVISRESYSLLREGTRSLREVLEAESAWRYLYGTGCVAGVYLPGSRQTLPI

4dle. 1. A

-----

Target

YQALKKGLLSAEVARLLLEAQAATGFLLDPVKGERLTVDEAVRKGLVGPELHDLRLLSAERAVTGYRDPYTEQTISLFAQM

4dle. 1. A

-----

Target

KKDLIPAEELRLDAQLATGGIVDPRLGPHLPLEVAYQRGYLNKDTHDQLSEPSEVRSYVDPSTDERLSYTQLLRRCRR

4dle. 1. A

-----

Target

DETSGLFLLPLSEARKLTFRGLRKQITVEELVRSHVMDEATAQRLQEGLTSIEEVSKNLQKFLEGTSSIAGVLVDATKER

4dle. 1. A

-----

Target

LSVYQAMKKGIIIRPGTAFELLEQAATGYVIDPIKGLKLTVEEAVRMGIVGPEFKDKLLSAERAVTGYKDPYSGKLISLF

4dle. 1. A

-----

Target

QAMKKGILKDHGIRLLEAQAATGGIIDPEESHRLPVDVAYQRGLFDEEMNEILTDPSDDTKGFFDPNTEENLTYLQIME

4dle. 1. A

-----

Target

RCVTDPQTGLRLLPLKEKKRERKTSSKSSVRKRRVIVDPETGKEMSVYEAYRKGLIDHQTYLELSEQECEWEEITISS

4dle. 1. A

-----

Target

DGVVKSMIIDRRSGRQYDIDEAIAKSLIDRSALDQYRAGTSLITEFADMLSGNAGGFRSRSSSVGSSSSYPISPAVSRTQ

4dle. 1. A

-----

Target

LASWSDPTEETGPVAGILDTETLEKVSITEAMHRNLVDNITGQRLLEAQAQCTGGIIDPNTGERFPVTDVANKGLVDKIMV

4dle. 1. A

-----

Target

DRINLAQKAFCGFEDPRTKTKMSAAQALKKGWLYYEAGQRFLEVQYLTGGLIEPDTGPRVPLDEALQRGTVDARTAQKLK

4dle. 1. A

-----

Target

DVSAYSKYLCPTKTKLISYKDALDRSMVEEGTGLRLEAAAQSSKGYSPYSVSGSGSTTGSRSGSRTGSRAGSRRGSF

4dle. 1. A

-----

Target

DATSGGFSMTFSSSSYSSSGYGRRYASGPTSSLGGPESAAA

4dle. 1. A

-----

| Model #23                                                                           | File | Built with    | Oligo-State                   | Ligands | GMQE | QMEANDisCo Global |
|-------------------------------------------------------------------------------------|------|---------------|-------------------------------|---------|------|-------------------|
|  | PDB  | ProMod3 3.3.0 | monomer (matching prediction) | None    | 0.00 | 0.57 ± 0.05       |

| Template | Seq Identity | Oligo-state | QSQE | Found by | Method | Resolution | Seq Similarity | Range    | Coverage | Description |
|----------|--------------|-------------|------|----------|--------|------------|----------------|----------|----------|-------------|
| 1sjj.1.B | 26.16        | homo-dimer  | 0.00 | HHblits  | 2DX    | -          | 0.33           | 64 - 737 | 0.15     | actinin     |

The template contained no ligands.

Target

MSGEDQEVRAVVEDGSNGGSGSPSPGDTLPWNLEKTQRSRRGGGGPGNGSVLDPAAERAVIRIADERDRVQKKTFTKWVN

1sjj. 1. B

-----DPAWEKQQRKTFTAWCN

Target

KHLIKAQRHISDLYEDLRDGHNLISLLEVLSGDSLPR-EKGRMRFHKLQNVQIALDYLRRHQVKLVNIRNDDIADGNPKL

1sjj. 1. B

SHLRKAGTQIENIEEDFRDGLKMLLLEVISGERLAKPERGKMRVHKISNVNKALDFIASKGVKLVSIGAEIIVDGNVKM

Target

TLGLIWTIILHFQISDIQVSGQSEDMTAKEKLLWSQRMVEGYQGLRCDNFTSSWRDGRLFNAI IHRHKPMLIDMNKVYR

1sjj. 1. B

TLGMIWTIILRFQIDISVE---ETSAKEGLLLWYQRKTAPYKNVNIQNFHISWKDGLGFCAL IHRHPELIDYGKLRK

Target

QTNLENLDQAFSVAERDLGVTRLLDPEDVD-VPQPDEKSIITYVSSLYDAMPVPDVQDGV-----KANELQLRWQE

1sjj. 1. B DDPLTNLNTAFDVAEKYLDIPKMLDAEDIVGTARPDEKAIMTYVSSFYHAFSGAQAETAANRICKVLAVNQENEQLMED

Target YRELVLALLQWIRAHTAAFEERRFPSSFEEIEILWCQFLKFKETELPAKEADKNRSGIYQSLEGAVQAG---QLKVPPG  
1sjj. 1. B YEKLASDLLEWIRRTIPWLENRAPENTMQAMQKLEDFRDYRRLHKPPKVQEKQLEINFNTLQTKLRLSNRPAFMPSEG

Target YHPLDVEKEWGKLVAILEREKQLRSEFERLERLQRIVSKLQMEAGLCEEQLNQADALLQSDV---RLLAAGKAPQQRAG  
1sjj. 1. B KMVSDINNAWGGLEQAEGGYEELLNEIRRLERLDHLAEKFRQKASIHESWTDGKEAMLQQKDYETATLSEIKALLKKHE

Target EVERDLDKADGMIRLLFNDVQALKDGRHPQGEQMYRRVYRLHERLVAIRTEYNL---RLRGTPRHP---ELEDSTLRYL  
1sjj. 1. B AFESDLAAHQDRVEQIAAIAQELNELDYDPSVSNARCQKICDQWDNLGALTQKRREALERTEKLLTIDQLYLEYAKRA

Target QDLLAWVEENQRRVDSAEWGVLDPSVEAQLGSHRGLHQSVEEFRAKIERARTDE-----GQLS---PATRGAYRDCLG  
1sjj. 1. B APFNNWMEGAMEDLQDTFIVHTIEEIQGLTTAHEQFKATLPDADKERQAILGIHNEVSKIVQTYHVNMAGTNPYTTITPQ

Target RLDLQYAKLLNSSKARLSLES-----LH-GFVAAATKELMWLSEKEEEEVGFDSERNSNMAAKKEAYSALMRE  
1sjj. 1. B EINGKWEHVRQLVPRRDQALMEEHARQQQNERLRKQFGAQANVIGPWIQTKMEEIGRISIEMH-GTLEDQLNHLRQYEKS

Target LELKEKKIKEIQSTGDRLLREDHPARPTVESFQAALQTQWSWMLQLCCIEAHLKENTAYFQFFSDVREAAEQRLKLQET  
1sjj. 1. B IVNYKPKIDQLEGDHQIQEALIFDNKHTNYTMEHIRVGEWQLLTTIARTINEVENQILTRD-----

Target LHRKYTCDRSITVTRLEDLLQDAQDEKDLNEYRGHLSGLAKRAKAIIVQLTPRNPTQPTRGRVPLLAVCDYKQVEATVHK  
1sjj. 1. B -----

Target GDECQMLGPAQPFHWKVLSSSGSEAAVPSVCFVPPPNQEALAEAVARLEAQHQALVTLWHQLHTDMKSLLAWQSLSRDVQ  
1sjj. 1. B -----

Target LIRSWSLVTFRTLKPEEQRQALRSELHYQAFLRDSQDAGFGPEDRLQAEREYGCSCRHYQQLLSLEQGEQEESRCQR  
1sjj. 1. B -----

Target CISELKDIRLQLEACETRIVHRLRLPLDKEPARECAQRIAEQQKAQAEVEGLGKGVARLSAEAEKVLALPEPSPAAPT LR  
1sjj. 1. B -----

Target SELETLGKLEQVRSLSAIYLEKLTISLVIRSTQGAEALRAHEEQLEKAQAVPAALPELEATKAAMKKLRAQAEAQQP  
1sjj. 1. B -----

Target VFDALRDELGAQEVGERLQQRHGERDVEVERWRERV TQLLERWQAVLAQTDVRQRELEQLGRQLRYRESADPLGAWLQ  
1sjj. 1. B -----

Target DARRRQEIQAVPLADSQAVREQLRQE KALLEEIERHAEKVEECQRFQKQYINAIKDYLQLV TYKAQLEPVASPAKKPK  
1sjj. 1. B -----

Target VQSGSESVIQEYVDLRTRYSELSTLTSQYIRF ISETLRMEEERLAEQQRAEERERLAEVEAALEKQRQLAEHAQAKA  
1sjj. 1. B -----

Target QAEREAQELQRRMQEEVARREEVAVDAQQKRSIQEELQQLRQSSEAEIQAKARQVEAERSRLRIEEEIRVVRLQLETT  
1sjj. 1. B -----

Target ERQRGGAEGELQALRARAEEAEQKRQAQEEAERLRQVQEETQRKRQAEAEGLRVKAEAEAREKQRALQALEELRLQ  
1sjj. 1. B -----

Target AEEAERRLRQAEAEERARQVQVALETAQRSQAELQSKHASFAEKTAQLERTLEEHTVVVQLREEATRREQQAEAEERAR  
1sjj. 1. B -----

Target EEAERELERWQLKANEALRLRLQAE EVAQQKSLAQAEAEKQKEAAEREARRRGKAEQAVRQRELAEQELEQRQLAEGT  
1sjj. 1. B -----

Target AQQRLAAEQELIRLRAETE QGEQQRQLLEEELARLQSEAAAATQKRQLEAE LAKVRAEMEVLLASKARAEESRSSEK  
1sjj. 1. B -----

Target SKQRLEAEAGRFRELAEEAARLRALAE EAKRQRQLAEEDAARQRAEAERVLSEKLAAI SEATRLKTEAEIALKEKEAENE  
1sjj. 1. B -----

Target RLRRLAEDEAFQRRRLLEEQAQHKADIEERLAQLRKASESELERQKGLVEDTLRQRRQVEEEILALKASFEKAAAGKAEL  
1sjj. 1. B -----

Target ELELGRIIRGNAEDTLRSKEQAEQEAARQRQLAAEEERRRREAEERVQKSLAAEEEAARQKAALEEVEERLKA KVEEARRL  
1sjj. 1. B -----

Target RERAEHESVRQLQLAQEAAQKRLQAE EKAHAFVQQKEQELQQTLQQEQSVLEKLRSEAEAAARRAAEEAEERAEAREA  
1sjj. 1. B -----

Target AQSQRVVEEAERLKQAAEEQAQAQAQAAAEKLRKEAEQEAARRAQAEQAALRQKQAADAEMEKKH KFAEQTLRQKAQV  
1sjj. 1. B -----

|                      |                                                                                             |
|----------------------|---------------------------------------------------------------------------------------------|
| Target<br>1sjj. 1. B | EQELTALRLKLEETHQKSILDQELQRLKAEVTEAARQRSQVEEELFSVRVQMEELGKLKARIEAENRALILRDKNTQR<br>-----     |
| Target<br>1sjj. 1. B | LLQEEAEKMKQVAEEAARLSVAAQEAARLRQLAEEDLAQQRALAEKMLKEKMQAVQEATRLKAEAEELLQQQKELAQEQAR<br>-----  |
| Target<br>1sjj. 1. B | RLQEDKEQMAQQLAQETQGFQRTLETERQRQLEMSAEAEERLRLVAEMSRAQARAEEDAQRFKQAEIIGAKLHRTELAT<br>-----    |
| Target<br>1sjj. 1. B | QEKVTLVQTLETQRQQSDRDADRLREATAELEREKDKLKKEAELLQLKSEEMQTVQQEQLLQETQALQQSFLSEKDSLLQ<br>-----   |
| Target<br>1sjj. 1. B | RERFIEEEKAKLERLFQDEVAKAQLREEQQRQQQMQQEKQQLLASMEEARRRQHEAEEGVRRKQEELQLLEQQRQQQE<br>-----     |
| Target<br>1sjj. 1. B | QLLAENRRRLRERLEHLEEEHRAALAHSEEITAAQAAATRALPNGQDAADGPAAEPEHAFEGLRQKVPAQQLQEAGILST<br>-----   |
| Target<br>1sjj. 1. B | EELQRLAQGHTTVAELTQREDVRRYLQGHSSIAGLLLKPANEKLTIIYAALRRQLLSPGTALILLEAQAASGFLDPVRNR<br>-----   |
| Target<br>1sjj. 1. B | RLTVTEAVKEGVVGPPELHHKLLSAERAVTGYKDPYTGEKISLQFQAMKKDLIVREHGIRLLEAQIATGGVIDPVHSHRVPV<br>----- |
| Target<br>1sjj. 1. B | DVAYHRGYFDEEMNRVLQDPSDDTKGFFDPNTHENLTYLQLLERCVEDPETGLRLLPLTDQAAKGGLVYTDSEARDVFE<br>-----    |
| Target<br>1sjj. 1. B | KATVSAPFGKFQGKTVTIWELINSEYFTAQRRDLLRQFRTGKVTVEKIIKIVITVIEEHEQKQLCFQGLRALVPAEL<br>-----      |
| Target<br>1sjj. 1. B | LESGIIDWDLFRQLQLGERSVQVEAVEVEGVRRALRGSGVIAGVWLEEARQKLSIYEALKKELLQPEAAVALLEAQAGTGH<br>-----  |
| Target<br>1sjj. 1. B | VIDPAT SARLTVDEAVRAGLVGPPELHEKLLSAEKAVTGYKDPYSGQSVSLFQALKKGLIPREQGLRLDDAQLSTGGTVDP<br>----- |
| Target<br>1sjj. 1. B | SKSHRLPLDVACARGYLDEETSTALSAPRDDAKTYDPRTWELATYSQLQQCRPDPLTGLSLLPLSEEAARARQQELYS<br>-----     |
| Target<br>1sjj. 1. B | EVQAREAFQKATVEVPVGSFQGRAVTIWELINSEYFTAQRRQELLRQFRTGKVTVEKIIKIVITVIEEVETRRERLSFS<br>-----    |
| Target<br>1sjj. 1. B | GLRAPVPASELLAAGILSSSQFEQLKDGTKSVKDLSELSSLQTLQSGCLAGIYLESKEKVTIYEAMRRGLRPSTAI<br>-----       |
| Target<br>1sjj. 1. B | LLLEAQAATGFLVDPVRNQRLYVHEAVKAGVVGPELHEKLLSAEKAVTGYKDPYSGSTISLQFQAMKKGLVREHGIRLLE<br>-----   |
| Target<br>1sjj. 1. B | AQIATGGIIDPVHSHRVPVDVACQRGYFDEEMNRVLEDPSDDTKGFFDPNTHENLTYRQLLERCVEDPETGLRLLPLKGP<br>-----   |
| Target<br>1sjj. 1. B | EKAEVVETTRYVTEETTRAFEETQIDIPGGSGHGGSTMSLWEVMQSDLIPEEQRAQLMADFQAGRVTKERMIIIIIEII<br>-----    |
| Target<br>1sjj. 1. B | EKTEIVRQQNLASYDYVRRRLTAEDLYEARVISRESYSLLREGTRSLREVLEAESAWRYLYGTGCVAGVYLPGRQTLPI<br>-----    |
| Target<br>1sjj. 1. B | YQALKKGLLSAEVARLLLEAQAATGFLDPVKGERLTVDEAVRKGLVGPELHDLRLSAERAVTGYRDPYTEQTISLQFQAM<br>-----   |
| Target<br>1sjj. 1. B | KKDLIPAEELRLDDAQLATGGIVDPRLGFHLPLEVAYQRGYLNKDTHDQLSEPSEVRSYVDPSTDERLSYTLRRCR<br>-----       |
| Target<br>1sjj. 1. B | DETSGLFLLPLSEARKLTFRGLRKQITVEELVRSHVMDEATAQRLQEGLTSIEEVSKNLQKFLEGTSSIAGVLVDATKER<br>-----   |
| Target<br>1sjj. 1. B | LSVYQAMKGGIIRPGTAFELLEAQAATGYVIDPIKGLKLTVEEAVRMGIVGPEFKDKLLSAERAVTGYKDPYSGKLISLF<br>-----   |
| Target<br>1sjj. 1. B | QAMKKGLILKDHGIRLLEAQIATGGIIDPEESHRLPVDVAYQGLFDEEMNEILTDPSDDTKGFFDPNTEENLTYLQME<br>-----     |
| Target<br>1sjj. 1. B | RCVTDPTGLRLLPLKEKKRERKTSKSSVRKR RVIVDPETGKEMSVYEAYRKGLIDHQTYLELSEQECEWEEITISS<br>-----      |

Target 1sjj. 1. B DGVVKSMIIDRRSGRQYDIDEAIAKSLIDRSALDQYRAGTLSITEFADMLSGNAGGFRSRSSSVGSSSSYPISPAVSRTQ-----

Target 1sjj. 1. B LASWSDPTEETGPVAGILDTETLEKVSITEAMHRNLVDNITGQRLLEAQAQCTGGIIDPNTGERFPVTDVANKGLVDKIMV-----

Target 1sjj. 1. B DRINLAQKAFCGFEDPRTKTKMSAAQALKKGWLYYEAGQRFLEVQYLTGGLIEPDTPGRVPLDEALQRGTVDARTAQKLR-----

Target 1sjj. 1. B DVSAYSKYLTCPKTKLKISYKDALDRSMVEEGTGLRLLEAAQSSKGYSPYSVSGSGSTTGSRSGSRTGSRAGSRRGSF-----

Target 1sjj. 1. B DATGSGFSMTFSSSSYSSSGYGRRYASGPTSSLGGPESAAA-----

| Model #03                                                                         | File | Built with    | Oligo-State | Ligands | GMQE | QMEANDisCo Global |
|-----------------------------------------------------------------------------------|------|---------------|-------------|---------|------|-------------------|
|  | PDB  | ProMod3 3.3.0 | monomer     | None    | 0.00 | 0.55 ± 0.05       |

| Template | Seq Identity | Oligo-state | QSQE | Found by | Method | Resolution | Seq Similarity | Range    | Coverage | Description         |
|----------|--------------|-------------|------|----------|--------|------------|----------------|----------|----------|---------------------|
| 8iah.1.2 | 38.97        | monomer     | 0.00 | BLAST    | EM     | -          | 0.38           | 57 - 526 | 0.12     | Spectrin beta chain |

Excluded ligands

| Ligand Name.Number | Reason for Exclusion        | Description              |
|--------------------|-----------------------------|--------------------------|
| ADP.1              | Binding site not conserved. | ADENOSINE-5'-DIPHOSPHATE |
| ADP.2              | Binding site not conserved. | ADENOSINE-5'-DIPHOSPHATE |
| ADP.3              | Binding site not conserved. | ADENOSINE-5'-DIPHOSPHATE |
| ADP.4              | Binding site not conserved. | ADENOSINE-5'-DIPHOSPHATE |
| ADP.5              | Binding site not conserved. | ADENOSINE-5'-DIPHOSPHATE |
| ADP.6              | Binding site not conserved. | ADENOSINE-5'-DIPHOSPHATE |
| ADP.7              | Binding site not conserved. | ADENOSINE-5'-DIPHOSPHATE |
| ADP.8              | Binding site not conserved. | ADENOSINE-5'-DIPHOSPHATE |
| ADP.9              | Binding site not conserved. | ADENOSINE-5'-DIPHOSPHATE |
| ADP.10             | Binding site not conserved. | ADENOSINE-5'-DIPHOSPHATE |
| ADP.11             | Binding site not conserved. | ADENOSINE-5'-DIPHOSPHATE |
| ADP.12             | Binding site not conserved. | ADENOSINE-5'-DIPHOSPHATE |

Target 8iah. 1. 2 MSGEDQEVRAVVEDGSNGGSGSPSPGDTLPWNLEKTQSRRRGGGGPGNGSVLDP AERAVIR--IADERDRVQKKTFTKWV-----ERSRIKALADEREVVQKKTFTKWV

Target 8iah. 1. 2 NKHLIKAQRHISDLYEDLRDGHNLISLLEVLSGDSLPR-EKGRMRFHKLQNVQIALDYLRHRQVKLVNIRNDDIADGNPKNSHLARVSCRITDLYKDLRDGRMLIKLLEVLSGEMLPKPTKGKMRIHCLENVDKALQFLKEQRVHLENMGSHDIVDGNHR

Target 8iah. 1. 2 LTLGLIWTIILHFQISDIQVSGQS--EDMTAKEKLLLWSQRMVEGYQGLRCDNFTSSWRDGRLFNAI IHRHKPMLIDMNKLVLGLIWTIILRFQIQDIVVQTQEGRETRSAKDALLWCQMKTAGYPNVNVTNFTSSWKDGLAFNALIHKHRPDLIDFDK

Target 8iah. 1. 2 VYRQTNLLENLDQAFSVAERDLGVTRLLDPEDVDVPQPDEKSIIITYVSSLYDAMP-----RVPDVQDGVKANELQLLKDSNARHNLEHAFDVAERQLGIITQLLDPEDVFTENPDEKSIIITYVAFYHYFSKMVLAVEGKRVGKVIDHAITEKMI

Target 8iah. 1. 2 RWQEYRELVLILLQWIRAHTAAFEERRFPSSFEEIEILWCQFLKFKETELPAKEADKNRSGKIYQSLEGAVQAGQLKV--EYSGGLASDLLTWIEQITITVLNSRKFANSLAGVQQQLQAFSTYRTVEKPPKFQEGKNLEVLLFTIQSRMRANNQKVYT

Target 8iah. 1. 2 -PPGYHPLDVEKEWGKLVHAILEREKQLRSEFERLERLRQIVSKLQMEAGLCEEQLNQADALLQSD---VRLLAAGKAPQPHDGKLVSDINRAWESLEEA EYRRELALRSELIRQEKEQLARRFDRKAAMRETWLNENQRLVAQDNFGYDLAAVEAAKK

Target 8iah. 1. 2 RAGEVERDLKADGMIRLLFNDVQALK-DGRHPQGEQMYRR--VYRLHERLVAIRTEYNLRLRGTPRHPELEDSTLRYLQKHEA IETDTAA YEERVRALEDLARELELENYHDQKRITARKDNILRLWNYLQELLQSRQRLETTLALQQL-----FQ

Target 8iah. 1. 2 DLLA---WVEENQRRVDSA EWGVDLPSVEAQLGSHRGLHQSVEEFRAKIERAR-----TDEGQLSPATRGAYRDCLGRL  
DMLHSIDWMDEIKAHLLSAEFGKHLLEAEDLLQKHKLMEADIAIQGDKVKAITAATLQFTEETGYQPCDPQVIRDRVSHL

Target 8iah. 1. 2 DLQYAKLLNSSKARLSLES LHGFVAAATKELMWLSEKEEEEVGFWDWSE RNSNMAAKKEAYSALMRELELKEKKIKEIQS  
EQCFAELSNTAAGRKAQLE-----

Target 8iah. 1. 2 TGDRLLR EDHPARPTVESFQAALQTQWSWMLQLCCCIEAHLKENTAYFQFFSDVREAE EQRLKLQETLHRKYTCDRSITV  
-----

Target 8iah. 1. 2 TRLEDLLQDAQDEKDLNEYRGHLSGLAKRAKAI VQLTPRNPTQPTRGRVPLLAVCDYKQVEATVHKGDECQMLGPAQPF  
-----

Target 8iah. 1. 2 HWKVLSSSGSEAAVPSVCFLVPPPNQEAL EAVARLEAQHQALVTLWHQLHTDMKSLLAWQSLSRDVQLIRSWSLVTFRTL  
-----

Target 8iah. 1. 2 KP EEQRQALRSLELHYQAF LRDSQDAGGFGPEDRLQAEREY GSCSRHYQQLQSLEQGEQ EESRCQRCISELKDIRLQLE  
-----

Target 8iah. 1. 2 ACETRTVHRLRLPLDKEPARECAQR IAEQQKAQAEVEGLGKGVARLSAEAEKVLALPEPSPAAPTLRSELELT LGKLEQV  
-----

Target 8iah. 1. 2 RLSIAIYLEKLKTISLVIRSTQGAE EALRAHEEQLEQAQVPAALPELEATKAAMKKLRAQAE AQPVFDALRDEL RGAQ  
-----

Target 8iah. 1. 2 EVGERLQQRHGERDVEVERWRERV TQLLERWQAVLAQTDVRQRELEQLGRQLRYYRESADPLGAWLQDARRRQE QIQAVP  
-----

Target 8iah. 1. 2 LADSQAVREQLRQE KALLEEIERHAEKVEECQRFAKQYINAIKDYELQLV TYKAQLEPVASPAKKPKVQSGSESVIQEYV  
-----

Target 8iah. 1. 2 DLRTYSELSTLTSQYIRF ISETLRRMEEEERLAEQQR AEERERLAEVEAALEKQRQLAEAHAQAKAQAERE AQELQRRM  
-----

Target 8iah. 1. 2 QEEVARREEVAVDAQQKKRSIQEELQQLRQSSEAEIQA KARQVEAAERSRLRIEEEIRVVRLQLETTERQRGGAEGELQA  
-----

Target 8iah. 1. 2 LRARAEAEAKRQAQEEAERLRRQVQEETQRKRQAEAE LGLRVKAEAEAAAREKQRALQALEELRLQAE EAERRLRQAEA  
-----

Target 8iah. 1. 2 ERARQVQVALETAQRSAQAE LQSKHASFAEKTAQLERTLEEEHVTVVQLREEATRREQQQAEARAREEAERELERWQLK  
-----

Target 8iah. 1. 2 ANEALRLRLQAE EVAQQKSLAQAEAEKQKEAAEREARRRGKAE EQAVRQRELAEQELERQRQLAEGTAQQRLAAEQELIR  
-----

Target 8iah. 1. 2 LRAETE QGEQQRQLLEEELARLQSEAAAATQKRQELAEALAKVRAEMEVLLASKARAE EESRSSEKSKRLEAEAGRFR  
-----

Target 8iah. 1. 2 ELAE EAARLRALAE EAKRQRQLAEEDAA RQRAEAERV LSEKLAAI SEATRLKTEAEIALKEKEAENERLRR LAEDEAFQR  
-----

Target 8iah. 1. 2 RRLEEQA AQHKADIEERLAQLRKASESELERQKGLVEDTLRQRQVEEEILALKASF EKAAAGKAELELELGRIRGNAED  
-----

Target 8iah. 1. 2 TLR SKEAQEQEAARQRQLAAEEERRRREAEERVQKSLAAEEEAARQRKAAL EEVERLKAKVEEARRLRERAEHESVRQLQ  
-----

Target 8iah. 1. 2 LAQEA AQKRLQAE EKAHAFVQQKEQELQQT LQQEQSVLEKL RSEAEAAARRAAEEAEERARAEREAAQSRQRVEEAERL  
-----

Target 8iah. 1. 2 KQAAEEQAQAQAQAAAAEKL RKEAEQEAARRAQAEQAALRQKQAADAEME KHKKFAEQTLRQKAQVEQEL TALRLKLEE  
-----

Target 8iah. 1. 2 TDHQKSILDQELQRLKAEVTEAARQRSQVEEELFSVRVQMEELGKLKARIEAENRALILRDKDNTQRLLQEEAEKMKQVA  
-----

Target 8iah. 1. 2 EE AARLSVAAQEAARLRQLAEEDLAQQRALAEKMLKEKMQAVQEATRLKAEAE LLQQQKELAQEQARRLQEDKEQMAQQ L  
-----

Target 8iah. 1. 2 AQETQGFQRTLETERQRQLEMSAE AERLRLRVAEMSRAQARA EEDAQRFRKQAE EIGAKLHRTELATQEKVTLVQTLETQ  
-----

Target 8iah. 1. 2 RQQSDRDADRLREATAELEREKDKLKKEAE LLQLKSEEMQTVQQEQLLQETQALQQSFLSEKDSLLQRERFIEEEKAKLE  
-----

8iah. 1. 2 -----  
Target RL FQDEVAKAQKLREEQRRQQQMQQEKQQLLASMEEARRRQHEAEEGVRRKQEELQLLEQQRQQEQQLAEENRRLRER  
8iah. 1. 2 -----  
Target LEHLEEEHRAALAHSEEITAAQAAATRALPNGQDAADGPAAEPEHAFEGLRQKVPAQQLQEAGILSTEELQRLAQGHTTV  
8iah. 1. 2 -----  
Target AELTQREDVRRYLQGHSSIAGLLKPANeklTIYAALRRQLSPGTALILLEAQASGFLLDPVRNRRLTVTEAVKEGVV  
8iah. 1. 2 -----  
Target GPelHHKLLSAERAVTGYKDPYTGEKISL FQAMKKDLIVREHGIRLLEAQIATGGVIDPVHSHRVPVDVAYHRGYFDEEM  
8iah. 1. 2 -----  
Target NRVLQDPSDDTKGFFDPNTHENLTYLQLLERCVEDPETGLRLLPLTDQAAKGGE LVYTDSEARDVFEKATVSAPFGKFQG  
8iah. 1. 2 -----  
Target KTVTIIWELINSEYFTAEQRDRLRQFRTGKV TVEKIIKIVITVIEEHEQKGQLCFQGLRALVPAAELLESGLIIDWDLFRQ  
8iah. 1. 2 -----  
Target LQLGERSVQEVAEVEGVRRALRGSGVIAGVWLEEARQKLSIYEALKKELLQPEAAVALLEAQAGTGHVIDPAT SARLTV D  
8iah. 1. 2 -----  
Target EAVRAGLVGPelHEKLLSAEKAVTGYKDPYSGQSVSLFQALKKGLIPREQGLRLLDAQLSTGGTVDP SKSHRLPLDVACA  
8iah. 1. 2 -----  
Target RGYLDEETSTALSAPRDDAKTYYPRTWELATYSQLQQCRPDPLTGLSLLPLSEEAARARQQELYSEVQAREAFQKATV  
8iah. 1. 2 -----  
Target EVPVGSFQGRAVTIWELINSEYFTAEQRQELLRQFRTGKV TVEKIIKIVITIVIEEVETRRERLSFSGLRAPVPASELLA  
8iah. 1. 2 -----  
Target AGILSSSQFEQLKDGKTSVKDLSELSSLQTL LQSGCLAGIYLEESKEKVTIYEAMRRGLLRPSTAILLLEAQATGFLV  
8iah. 1. 2 -----  
Target DPVRNQRLYVHEAVKAGVVGPELHEKLLSAEKAVTGYKDPYSGSTISL FQAMKKGLVREHGIRLLEAQIATGGIIDPVH  
8iah. 1. 2 -----  
Target SHRVPVDVACQRGYFDEEMNRVLEDPSDDTKGFFDPNTHENLTYRQLLERCVEDPETGLRLLPLKGPEKAEVVETTRVYT  
8iah. 1. 2 -----  
Target EEETRRAFEETQIDIPGGGSHGGSTMSLWEVMQSDLIPEEQRAQLMADFQAGRVTKERMIIIIIEIEKTEIVRQQNLAS  
8iah. 1. 2 -----  
Target YDYVRRRLTAEDLYEARVISRESYSLLREGTRSLREVLEAESAWRYLYGTGCVAGVYLPGSRQTLPIYQALKKGLLSAEV  
8iah. 1. 2 -----  
Target ARLLLEAQATGFLLDPVKGERLTVDEAVRKGLVGPELHDRLLSAERAVTGYRDPYTEQTISL FQAMKKDLIPAEELRL  
8iah. 1. 2 -----  
Target LDAQLATGGIVDPRLGFHLPLEVAYQRGYLNKDTHDQLSEPSEVRSYVDPSTDERLSY TQLLRRCRRDETSGLFLLPLSE  
8iah. 1. 2 -----  
Target ARKLTFRGLRKQITVEELVRSHVMDEATAQRLQEGLTSIEEVSKNLQKFLEGTSSIAGVLVDATKERLSVYQAMKKGIIR  
8iah. 1. 2 -----  
Target PGTA FELLEAQATGYVIDPIKGLKLTVEEAVRMGIVGPEFKDLLSAERAVTGYKDPYSGKLISL FQAMKKGLILKDHG  
8iah. 1. 2 -----  
Target IRLLEAQIATGGIIDPEESHRLPVDVAYQRGLFDEEMNEILTDPSDDTKGFFDPNTEENLTYLQLMERCVTDPQTGLRLL  
8iah. 1. 2 -----  
Target PLKEKKRERKTSSKSSVRKRRVIVDPETGEMSVYEAYRKGLIDHQTYLELSEQECEWEEITISSDGVVKSMIIDRRS  
8iah. 1. 2 -----  
Target GRQYDIDEAIAKSLIDRSALDQYRAGTLSITEFADMLSGNAGGFRSRSSSVGSSSSYPISPAVSRTQLASWSDPTEETGP  
8iah. 1. 2 -----  
Target VAGILDTETLEKVSITEAMHRNLVDNITGQRLLEAQACTGGIIDPNTGERFPVTD AVNKGVLVDKIMVDRINLAQKAFCGF  
8iah. 1. 2 -----  
Target EDPRTKTMSAAQALKKGWLYYEAGQRFLEVQYLTGGLIEPDTPGRVPLDEALQRGTVDARTAQKL RDVSAYS KYLTCPK  
8iah. 1. 2 -----



Target8iah. 1. 2TKLKISYKDALDRSMVEEGTGLRLLEAAQSSKGYSPYSVSGSGSTTGSRS GSRTGSRAGSRRGSF DATGSGFSMTFSS-----

Target8iah. 1. 2SSYSSSGYGRRYASGPTSSLGGPESAAA-----

| Model #22                                                                         | File | Built with    | Oligo-State                   | Ligands | GMQE | QMEANDisCo Global |
|-----------------------------------------------------------------------------------|------|---------------|-------------------------------|---------|------|-------------------|
|  | PDB  | ProMod3 3.3.0 | monomer (matching prediction) | None    | 0.00 | 0.57 ± 0.05       |

| Template | Seq Identity | Oligo-state | QSQE | Found by | Method | Resolution | Seq Similarity | Range    | Coverage | Description |
|----------|--------------|-------------|------|----------|--------|------------|----------------|----------|----------|-------------|
| 1sjj.1.A | 26.16        | homo-dimer  | 0.00 | HHblits  | 2DX    | -          | 0.33           | 64 - 737 | 0.15     | actinin     |

The template contained no ligands.

Target1sjj. 1. AMSGEDQEVRAVEDGSNGGSGSPSPGDTLPWNLEKTQRSRRGGGGPGNGSVLDP AERAVIRIADERDRVQKKTFTKWVN-----DPAWEKQQRKTTTAWCN

Target1sjj. 1. AKHLIKAQRHISDLYEDLRDGHNLISLLEVLSGDSLPR-EKGRMRFHKLQNVQIALDYL RHRQVKLVNIRNDDIADGNPKLSHLRKAGTQIENIEEDFRDGLKMLLLEVISGERLAKPERGKMRVHKISNVNKALDFIASKGVKLVSIGAEEIVDGNV KM

Target1sjj. 1. ATLGLIWTIILHFQISDIQVSGQSEDMTAKEKLLLSQRMVEGYQGLRCDNFTSSWRDGR LFNAIIHRHKPMLIDMNKVYRTLGM IWTIILRF AIQDISVE-----ETSAKEG LLLWYQRKTAPYKNVNIQNFHISWKDGLGFCAL IHRHRPELIDY GKL RK

Target1sjj. 1. AQTNLENLDQAFSVAERDLGVTRLLDPEDVD-VPQPDEKSIITYVSSLYDAMP RVPDVQDGV-----KANELQLRWQEDDPLTNLNTAFDVAEKYLDIPKMLDAEDIVGTARPDEKAIMTYVSSFYHAFSGAQKAETAANRICKVLAVNQENEQLMED

Target1sjj. 1. AYRELVLLLLQWIRAHATAAFEERRFPSSFEEIEILWCQFLKFKETELPAKEADKNRSGIYQSLEGAVQAG---QLKVPPGYEKLASDLLEWIRRTIPWLENRAPENTMQAMQKLEDFRDYRRLHKPPKVQEKQLEINFNTLQTKLRLSNRP AFMPSEG

Target1sjj. 1. AYHPLDVEKEWGKLVHAILEREKQLRSEFERLERLQRIVSKLQMEAGLCEEQLNQADALLQSDV---RLLAAGKAPQRAGKMVSDINNAWGGLEQAEGYEEWLLNEIRRLERLDHLAEKFRQKASIHESWTDGKEAMLQKQDYETATLSEIKALLKKHE

Target1sjj. 1. AEVERDLDKADGMIRLLFNDVQALKDGRHPQGEQMYRRVYRLHERLVAIRTEYNL---RLRGTPRHP----ELEDSTLRYLAFESDLAAHQDRVEQIAAIAQELNELDYDPSV NARCQKICDQWDNLGALTQKRREALERTEK LLETIDQLYLEYAKRA

Target1sjj. 1. AQDLLAWVEENQRRVDSAEWGV DLP SVEAQLGSHRGLHQSVEEFRAKIERARTDE-----GQLS---PATRGAYRDCLGAPFNWMEGAMEDLQD TFI VHTIEEIQGLTTAHEQFKATLPDADKERQAILGIHNEVSKIVQTYHVN MAGTPYTTITPQ

Target1sjj. 1. ARLDLQYAKLLNSSKARLSLES-----LH-GFVAAATKELMWLSEKEEEEVGF DWSERN SNMAAKKEAYSALMREIENGKWEHVRQLVPRRDQALMEEHARQQQNERLRKQFGA QANVIGPW IQTKMEEIGRISIEMH-GTLEDQLNHLRQY EKS

Target1sjj. 1. ALELKEKKIKEIQSTGDRLLREDHPARPTVESFQAALQTQWSWMLQLCCCIEAHLKENTAYFQFFSDVREAE EQLRKLQETIVNYKPKIDQLEGDHQQIQEALIFDNKHTNYTMEHIRVGWEQLLTTIARTINEVENQILTRD-----

Target1sjj. 1. ALHRKYTCDRSITVTRLEDLLQDAQDEK DQLNEYRGHLSGLAKRAKAI VQLTPRNPTQPTRGRVPLLAVCDYKQVEATVHK-----

Target1sjj. 1. AGDECQMLGPAQPFWKVLSSSGSEAAVPSVCFLVPPPNQEAL EAVARLEAQHQALVTLWHQLHTDMKSLLAWQSLSRDVQ-----

Target1sjj. 1. ALIRSWSLVTFR TLKPEEQRQALRSLELHYQAF LRDSQDAGGFGPEDRLQAEREYGSCSRHYQQLLSLEQGEQEESRCRQ-----

Target1sjj. 1. ACISELKDIRLQLEACETRIVHRLRLPLDKEPARECAQRIAEQQKAQAEVEGLGKGVARLSAEAEKVLALPEPSPAAPT LR-----

Target1sjj. 1. ASELETLGKLEQVRSLSAIYLEKLK TISLVIRSTQGAEALRAHEEQ LKEAQAVPAALPELEATKAAMKKLRAQAE AQQP-----

Target1sjj. 1. AVFDALRDEL RGAQEVGERLQQRHGERDVEVERWRERV TQLLERWQAVLAQTDVRQRELEQLGRQLRYYRESADPLGAWLQ-----

|                      |                                                                                             |
|----------------------|---------------------------------------------------------------------------------------------|
| Target<br>1sjj. 1. A | DARRRQEQIQAVPLADSQAVREQLRQEKALLEEIERHAEKVEECQRFQAKQYINAIKDYELQLVTYKAQLEPVASPAKKPK<br>-----  |
| Target<br>1sjj. 1. A | VQSGSESVIQEYVDLRTRYSELSTLTSQYIRFISETLRRMEEEEERLAEQQRAEERERLAEVEAALEKQRQLAEAHAQAKA<br>-----  |
| Target<br>1sjj. 1. A | QAEREAQELQRRMQEEVARREEVAVDAAQQKRSIQEELQQLRQSSEAEIQAKARQVEAAERSRLRIEEEIRVVRLQLETT<br>-----   |
| Target<br>1sjj. 1. A | ERQRGGAEGELQALRARAEAEAKRQAQEEAERLRRQVQEETQRKRQAEAEELGLRVKAEAEAAAREKQRALQALEELRLQ<br>-----   |
| Target<br>1sjj. 1. A | AEEAERRLRQAEARARQVQVALETAQRSQAELQSKHASFAEKTAQLERTLEEEHVTVVQLREEATRREQQQAERAR<br>-----       |
| Target<br>1sjj. 1. A | EEAERELERWQLKANEALRLRLQAEVAQQKSLAQAEAEKQKEAAEREARRRGKAEQAVRQRELAEQELERQRQLAEGT<br>-----     |
| Target<br>1sjj. 1. A | AQQLAAEQELIRLRAETEQGEQQRQLLEEELARLQSEAAAATQKRQLEAEELAKVRAEMEVLLASKARAEESRSSEK<br>-----      |
| Target<br>1sjj. 1. A | SKQRLEAEAGRFRELAEEAARLRALAEAKRQRQLAEEDAARQRAEAERVLSEKLAAISEATRLKTEAEIALKEKEAENE<br>-----    |
| Target<br>1sjj. 1. A | RLRRLAEDEAFQRRRLEEQAQHKADIEERLAQLRKASESELERQKGLVEDTLRQRRQVEEELALKASFEEAAAAGKAEL<br>-----    |
| Target<br>1sjj. 1. A | ELELGRI RNAEDTLRSKEAQEQEAARQRQLAAEEERRRREAEEERVQKSLAAEEEAARQRKAAL EEVERLKAKVEEARRL<br>----- |
| Target<br>1sjj. 1. A | RERAEHESVRQLQLAQEAAQKRLQAEKKAHAFVQQKEQELQQTLLQQEQSVLEKL RSEAEAAARRAAEEAEARERAEREA<br>-----  |
| Target<br>1sjj. 1. A | AQSRQRVEEAERLKQAAEEQAQAQAQAAAEKLRKEAEQEAARRAQAEQAALRQKQAADAEMEKHKKFAEQTLRQKAQV<br>-----     |
| Target<br>1sjj. 1. A | EQELTALRLKLEETHQKSILDQELQRLKAEVTEAARQRSQVEEELFSVRVQMEELGKLKARIEAENRALILRDKNQTR<br>-----     |
| Target<br>1sjj. 1. A | LLQEEAEKMKQVAEEAARLSVAAQEAARLRQLAEEDLAQQRALAEKMLKEKMQAVQEATRLKAEAEELLQQQKELAQEQAR<br>-----  |
| Target<br>1sjj. 1. A | RLQEDKEQMAQQLAQETQGFQRTLETERQRQLEMSAEERLRLRVAEMSRAQARAEEDAQFRKQAEETGAKLHRTELAT<br>-----     |
| Target<br>1sjj. 1. A | QEKVTLVQTLETQRQQSDRDADRLREATAELEREKDKLKKEAEELLQLKSEEMQTVQQEQLLQETQALQQSFLSEKDSLLQ<br>-----  |
| Target<br>1sjj. 1. A | RERFIEEEKAKLERLFQDEVAKAQLREEQQRQQQMQQEKQQLASMEEARRRQHEAEEGVRRKQEELQLLEQQRQQQE<br>-----      |
| Target<br>1sjj. 1. A | QLLAEEENRRLRERLEHLEEEHRAALAHSEEITAAQAAATRALPNGQDAADGPAAEPEHAFEGLRQKVPAAQLQEAGILST<br>-----  |
| Target<br>1sjj. 1. A | EELQRLAQGHTTVAELTQREDVRRYLQGHSSIAGLLKPANEKLTIIYAALRRQLLSPGTALILLEAQAASGFLDPVRNR<br>-----    |
| Target<br>1sjj. 1. A | RLTVTEAVKEGVVGPPELHHKLLSAERAVTGYKDPYTGEKISLQFQAMKKDLIVREHGIRLLEAQIATGGVIDPVHSHRVPV<br>----- |
| Target<br>1sjj. 1. A | DVAYHRGYFDEEMNRVLQDPSDDTKGFFDPNTHENLTYLQLLERCVEDPETGLRLLPLTDQAAKGELVYTDSEARDVFE<br>-----    |
| Target<br>1sjj. 1. A | KATVSAPFGKFQGKTVTIWE LINSEYFTAQRRDLLRQFRTGKVTVEKIIKIVITVIEEHEQKQQLCFQGLRALVPAEL<br>-----    |
| Target<br>1sjj. 1. A | LESGIIDWDLFRQLQLGERSVQEVAEVEGVRRALRGSGVIAGVWLEEARQKLSIYEALKKELLQPEAAVALLEAQAGTGH<br>-----   |
| Target<br>1sjj. 1. A | VIDPAT SARLTVDEAVRAGLVGPPELHEKLLSAEKAVTGYKDPYSGQSVSLFQALKKGLIPREQGLRLDDAQLSTGGTVDP<br>----- |
| Target<br>1sjj. 1. A | SKSHRLPLDVACARGYLDEETSTALSAPRDDAKTYYPRTWELATYSQLQQQCRPDPLTGLSLLPLSEEAARARQQELYS<br>-----    |

Target  
1s.jj. 1. A

EVQAREAFQKATVEVPVGSFQGRAVTIWELINSEYFTAEQRQELLRQFRTGKVTVEKIIKIVITIVEEVETTRRERLSFS

Target  
1s.jj. 1. A

GLRAPVPASELLAAGILSSSQFEQLKDGTKSVKDLSELSSLQTLQGGCLAGIYLEESKEKVTIYEAMRRGLLRPSTAI

Target  
1s.jj. 1. A

LLLEAQAATGFLVDPVRNQRLYVHEAVKAGVVGPELHEKLLSAEKAVTGYKDPYSGSTISLFAQMKKGLVVRHGIRLLE

Target  
1s.jj. 1. A

AQIATGGIIDPVHSHRVPVDVACQRGYFDEEMNRVLEDPSDDTKGFFDPNTHENLTYRQLLERCVEDPETGLRLLPLKGP

Target  
1s.jj. 1. A

EKAEVVETTRVYTEETTRRAFEETQIDIPGGGSHGGSTMSLWEVMQSDLIPEEQRAQLMADFQAGRVTKERMIIIIIEII

Target  
1s.jj. 1. A

EKTEIVRQQNLASYDYVRRRLTAEDLYEARVISRESYSLLREGTRSLREVLEAESAWRYLYGTGCVAGVYLPGSRQTLP

Target  
1s.jj. 1. A

YQALKKGLLSAEVARLLLEAQAATGFLLDPVKGERLTVDEAVRKGVLVGPETHDRLLSAERAVTGYRDPYTEQTISLFAQM

Target  
1s.jj. 1. A

KKDLIPAEELRLDAQLATGGIVDPRLGFHLPLEVAYQRYLKNKDTHTDQLSEPSEVRSYVDPSTDERLSYQLLRRCRR

Target  
1s.jj. 1. A

DETSGLFLLPLSEARKLTFRGLRKQITVEELVRSHVMDEATAQRLQEGLTSIEEVSKNLQKFLEGTSSIAGVLVDATKER

Target  
1s.jj. 1. A

LSVYQAMKGIIRPGTAFELLEAQAATGYVIDPIKGLKLTVEEAVRMGIVGPEFKDLLSAERAVTGYKDPYSGKLISLF

Target  
1s.jj. 1. A

QAMKKGILKDHGIRLLEAQAATGGIIDPEESHRLPVDVAYQRLGFDEEMNEILTDPSDDTKGFFDPNTEENLTYLQME

Target  
1s.jj. 1. A

RCVTDPQTGLRLLPLKEKKRERKTSSKSSVRKRRVIVDPETGKEMSVYEAYRKGLIDHQTYLELSEQECEWEEITISS

Target  
1s.jj. 1. A

DGVVKSMIIDRRSGRQYDIDEAIAKSLIDRSALDQYRAGTSLITEFADMLSGNAGGFRSRSSSVGSSSSYPISPAVSRTQ

Target  
1s.jj. 1. A

LASWSDPTEETGPVAGILDTETLEKVSITEAMHRNLVDNITGQRLLEAQAQCTGGIIDPNTGERFPVTDVANKGLVDKIMV

Target  
1s.jj. 1. A

DRINLAQKAFCGFEDPRTKTKMSAAQALKKGWLYYEAGQRFLEVQYLTGGLIEPDTGPRVPLDEALQRGTVDARTAKLR

Target  
1s.jj. 1. A

DVSAYSKYLCPTKTKLISYKDALDRSMVEEGTGLRLEAAAQSSKGYSPYSVSGSGSTTGSRSRSTGSRAGSRRRGSF

Target  
1s.jj. 1. A

DATGSGFSMTFSSSSYSSSGYGRRYASGPTSSLGGPESAAA

| Model #07                                                                           | File | Built with    | Oligo-State                   | Ligands | GMQE | QMEANDisCo Global |
|-------------------------------------------------------------------------------------|------|---------------|-------------------------------|---------|------|-------------------|
|  | PDB  | ProMod3 3.3.0 | monomer (matching prediction) | None    | 0.00 | 0.47 ± 0.05       |

| Template  | Seq Identity | Oligo-state | QSQE | Found by | Method | Resolution | Seq Similarity | Range     | Coverage | Description |
|-----------|--------------|-------------|------|----------|--------|------------|----------------|-----------|----------|-------------|
| 1s.jj.1.B | 12.54        | homo-dimer  | 0.00 | HHblits  | 2DX    | -          | 0.27           | 187 - 806 | 0.13     | actinin     |

The template contained no ligands.

Target  
1s.jj. 1. B

MSGEDQEVRAVVEDGSNGGSGSPSPGDTLPWNLEKTQSRRRGGGPGNGSVLDPAERAVIRIADERDRVQKKTFTKWVN

Target 1sjj. 1. B KHLIKAQRHISDLYEDLRDGHNLISLLEVLSGDSLPREKGRMRFHKLQNVQIALDYLRHRQVKLVNIRNDDIADGNPKLT-----

Target 1sjj. 1. B LGLIWTIILHFQISDIQVSGQSEDMTAKKLLWSQRMVEGYQGLRCDNFTSSWRDGRLFNAI IHRHKPMLIDMN--KVY-----QRKTF TAWCNSHLRKA--GTQIENIEEDFRDGLKMLLLEVISGERLAKPERGKM

Target 1sjj. 1. B RQTNLENLDQAFSVAERDLGVT--RLDPEDVDVPQPEKSIITYVSSLYDAMPVPDVQDGVKANELQLRWQEYRELVL RVHKISNVNKALDFIA--SKGVKLVSIGAEEIVDGNV--KMTLGMTWTIILRFATQDISVE-----ETSAKEG

Target 1sjj. 1. B LLQWIRAHTAAFE---ERRFPSSFEEIEILWCQFLKFKETELP----AKEADKNRSKGIYQSLEGAVQAGQLKVP PGY-- LLLWYQRKTAPYKNVNIQNFHISWKDGLGFCAL IHRHRPELIDYGKLRKDDPLTNLNTAFDVAEKYLDIPKMLDAEDIVG

Target 1sjj. 1. B -----HPLDVEKEWGLHVAIILEREKQLRSEFERLERLQRIVSKLQMEAGLCEEQLNQADALLQSDVRL---LA TARPDEKAIMTYVSSFYHAFSGAQAETAA--NRICKVLAVNQENEQLMEDYEKLASDLLEWIRRTIPWLENRAPENTMQA

Target 1sjj. 1. B AGKAPQRAGEVERDLKADG---MIRLLFNDV--QALKD--GRHPQGEQMYRRVYRLHERLVAIRT---EYNLRLRGTPRH MQQKLEDFRDYRRLHKPKVKVEKQCLEINFNTLQTKLRLSNRPAFMPSEGMVSDINNAWGGLEQAEKG YEEWLLNEIRR

Target 1sjj. 1. B P---ELEDSTLRYLQDLLAWVEENQRRVDSA EWGV--DLPSVEAQLGSHRGLHQSV EEFRAKIERARTDEGQLS---PAT LERLDHLAEKFRKASIHESWTDGKEAMLQKQDYETATLSEIKALLKKHEAFESDLAAHQDRVEQIAATAQELNELDYDD

Target 1sjj. 1. B RGAYRDCLGRDLQYAKLLNSSKARLSLES-----LHGFVAAATKELMWLSEKEEEEVGFDSERNNSNMAAKK SPSVNARCQKICDQWNLGALTQKRREALERTEKLETTIDQLYLEYAKRAAPFNWMEGAMEDLQDTFIVHTIEEIQGLT

Target 1sjj. 1. B EAYSALMRELELKEKKIKEI---QSTGDRLLREDH---PARPTVESFQAALQTQWSWMLQLCCIEAHLKENTAY---- TAHEQFKATLPDADKERQAILGIHNEVSKIVQTYHVMAGTNPYTTITPQEINGKWEHVRQLVPRRDQALMEEHARQQQN

Target 1sjj. 1. B ---FQFFSDVREAEELRKLQETLHRKYTCDSRITVTRLEDLLQDAQDEKDLNEYRGHLSGLAKRAKAI VQLTPRNPT ERLRKQFGA QANVIGPWIQTKMEEIGRISI----EMHGTLEDQLNHLRQYEKSIVNYKPKIDQLEGDHQIQEAL-----

Target 1sjj. 1. B QPTRGRVPLAVCDYKQVEATVHKGDECQMLGPAQPFHWKLVSSSGSEAAVPSVCFLVPPPNQEAL EAVARLEAQHQALV-----

Target 1sjj. 1. B TLWHQLHTDMKSL LAWQSLSRDVQLIRSWSLVTFRTLKPEEQRQALRSLELHYQAFLRDSQDAGGFGPEDRLQAEREYGS-----

Target 1sjj. 1. B CSRHYQQLLSLEQGEQEESRCQRCISELKD IRLQLEACETRTRVHRLRLPLDKEPARECAQRIAEQQKAQAEVEGLGKGV-----

Target 1sjj. 1. B ARLSAEAEKVLALPEPSAAPT LRSELELTGKLEQVRSLSAIYLEKTKTISLVIRSTQGAEELRAHEEQ LKEAQAVPA-----

Target 1sjj. 1. B ALPELEATKAAMKKLRAQAEAAQPVFDALRDELRGAEVGERLQQRHGERDVEVERWRERV TQLLERWQAVLAQTDVRQR-----

Target 1sjj. 1. B ELEQLGRQLRYYRESADPLGAWLQDARRRQEIQAVPLADSQAVREQLRQE KALLEEIERHAEKVEECQRF AKQYINAIK-----

Target 1sjj. 1. B DYELQLV TYKAQLEPVASPAKKPKVQSGSESVIQEYVDLTRYSELSTLTSQYIRFIS ETLRRMEEEERLAEQQRAEERE-----

Target 1sjj. 1. B RLAEVEAALEKQRQLAEAHAQAKAQAEREAQELQRRMQEEVARREEVAVDAQQKRSIQEELQQLRQSSEAEIQA KARQV-----

Target 1sjj. 1. B EAAERSRLRIEEEIRVVRLQLETTERQRGGAEGELQALRARAEAEAQKRAQEAEERLRRQVQEETQRKRQAE AELGLR-----

Target 1sjj. 1. B VKAEAEAAAREKQALQALEELRLQAEAEERRLRQAEARARQVQVALETAQRSQAELQSKHASFAEKTAQLERTLEEEH-----

Target 1sjj. 1. B VTVVQLREEATRREQQQAEERAREEAERELRWQLKANEALRLRLQAE EVAQKSLAQAEAEKQKEAAEREARRRGKAE-----

Target 1sjj. 1. B EQAVRQRELAEQELERQRQLAEGTAQQRLAAEQELIRLRAETEQQGEQQRQLLEEEELARLQSEAAAATQKRQELEAE LAKV-----

Target 1sjj. 1. B RAEMEVLLASKARAEESRSSEKSKQRLAEAFAGRFRELAEEAARLRALAEAKRQRQLAEEDAARQRAEAERV LSEKLA-----

Target 1sjj. 1. B AISEATRLKTEAEIALKEKEAENERLRLAEDEAFQRRRLEEQAQHKADIEERLAQLRKASESELERQKGLVEDTLRQR-----

Target 1sjj. 1. B RQVEEELALKASFEEAAAGKAELELELGRIRGNAEDTLRSKEQAEQEAARQRQLAAEEERRRREAEERVQKSLAAEEEA-----

|            |                                                                                   |
|------------|-----------------------------------------------------------------------------------|
| 1sjj. 1. B | -----                                                                             |
| Target     | ARQRKAAL EEVERLKAKVEEARRLRERAEHESVRQLQLAQEAAQKRLQAEKKAHAFVQQKEQELQQTLLQQEQSVLEKLR |
| 1sjj. 1. B | -----                                                                             |
| Target     | SEAEAAARRAAEEAEERERAEREAAQSRQRVEEAERLKQAAEEQAQAQAQAAAAEKLKEAEQEAARRAQEAALRQK      |
| 1sjj. 1. B | -----                                                                             |
| Target     | QAADAEMEKHKKFAEQTLRQKAQVEQELTALRLKLEETHQKSILDQELQRLKAEVTEAARQRSQVEEELFSVRVQMEEL   |
| 1sjj. 1. B | -----                                                                             |
| Target     | GKLKARIEAENRALILRDKDNTQRLLQEEAEKMKQVAEEAARLSVAAQEAAARLRQLAEEDLAQQRALAEKMLKEKMQAVQ |
| 1sjj. 1. B | -----                                                                             |
| Target     | EATRLKAEALLQQQKELAQEQARRLQEDKEQMAQQLAQETQGFQRTLETERQRQLEMSAEERLRLRVAEMSRAQARAE    |
| 1sjj. 1. B | -----                                                                             |
| Target     | EDAQRFRKQAEIEGAKLHRTTELATQEKVTLVQTLETQRQQSDRDADRLREAIAELEREKDKLKEAELLQLKSEEMQTVQ  |
| 1sjj. 1. B | -----                                                                             |
| Target     | QEQLLQETQALQQSFLSEKDSLLQRERFIEEEKAKLERLFQDEVAKAQKLREEQQRQQQMKEKQQLLASMEEARRRQH    |
| 1sjj. 1. B | -----                                                                             |
| Target     | EAEEGVRRKQEELQLLEQQRQQEQQLLAENRRLRERLEHLEEEHRAALAHSEEITAAQAAATRALPNGDAADGPAAP     |
| 1sjj. 1. B | -----                                                                             |
| Target     | EHAFEGLRQKVPAAQLQEAGILSTEELQRLAQGHTTVAELTQREDVRRYLQGHSSIAGLLLKPANEKLTIIYAALRRQLLS |
| 1sjj. 1. B | -----                                                                             |
| Target     | PGTALILLEAQAASGFLDPVRNRRLTVTEAVKEGVVGPPELHHKLLSAERAVTGYKDPYTGEKISLQFQAMKKDLIVREHG |
| 1sjj. 1. B | -----                                                                             |
| Target     | IRLLEAQIATGGVIDPVHSHRPVDVAYHRGYFDEEMNRVLQDPSSDTKGFFDPNTHENLTYLQLLERCVEDPETGLRLL   |
| 1sjj. 1. B | -----                                                                             |
| Target     | PLTDQAAKGELVYTDSEARDVFEKATVSAPFGKFQKTVTIWELINSEYFTAQRRDLLRQFRTGKVTVEKIIKIVITV     |
| 1sjj. 1. B | -----                                                                             |
| Target     | IEEHEQKGQLCFQGLRALVPAEELLESGLIDWDLFRQLQLGERSVQEVAEVEGVRRALRGSGVIAGVWLEEARQKLSIYE  |
| 1sjj. 1. B | -----                                                                             |
| Target     | ALKKELLQPEAAVALLEAQAGTGHVIDPATSARLTVDEAVRAGLVGPELHEKLLSAEKAVTGYKDPYSGQSVSLFQALKK  |
| 1sjj. 1. B | -----                                                                             |
| Target     | GLIPREQGLRLDLAQLSTGGTVDPSPKSHRLPLDVACARGYLDEETSTALSAPRDDAKTYDPRTWELATYSQLQQCRPD   |
| 1sjj. 1. B | -----                                                                             |
| Target     | PLTGLSLLPLSEEAARARQQELYSEVQAREAFQKATVEVPVGSFQGRAVTIWELINSEYFTAQEQELLRQFRTGKVTVE   |
| 1sjj. 1. B | -----                                                                             |
| Target     | KIIKIVITIVEEVETTRRERLSFSGLRAPVPASELLAAGILSSSQFEQLKDGTSVKDLSELSSLQTLQSGGCLAGIYL    |
| 1sjj. 1. B | -----                                                                             |
| Target     | EESKEKVTIYEAMRRGLLRPSTAILLLEAQAATGFLVDPVRNQRLYVHEAVKAGVVGPPELHEKLLSAEKAVTGYKDPYSG |
| 1sjj. 1. B | -----                                                                             |
| Target     | STISLQFQAMKKGLVREHGIRLLEAQIATGGIIDPVHSHRPVDVACQRGYFDEEMNRVLEDPSDDTKGFFDPNTHENLT   |
| 1sjj. 1. B | -----                                                                             |
| Target     | YRQLLERCVEDPETGLRLLPLKGPEKAEVVETTRVYTEETTRAFEETQIDIPGGGSHGGSTMSLWEVMQSDLIPEEQRA   |
| 1sjj. 1. B | -----                                                                             |
| Target     | QLMADFQAGRVTKERMIIIIIEIEIEKTEIVRQQNLASYDYVRRRLTAEDLYEARVISRESYSLLREGTRSLREVLEESA  |
| 1sjj. 1. B | -----                                                                             |
| Target     | WRYLYGTGCVAGVYLPQSRQTLPIYQALKKGLLSAEVARLLLEAQAATGFLDPVKGERLTVDEAVRKGLVGPPELHDLRL  |
| 1sjj. 1. B | -----                                                                             |
| Target     | SAERAVTGYRDPYTEQTISLQFQAMKKDLIPAEALRLDLAQLATGGIVDPRLGFHLPLEVAYQRGYLNKDHQDQLEPSE   |
| 1sjj. 1. B | -----                                                                             |
| Target     | VRSYVDPSTDERLSYTLRLRRCRDETSGLFLLPLSEARKLTFRGLRKQITVEELVRSHVMDEATAQRLQEGLTSIEEVS   |
| 1sjj. 1. B | -----                                                                             |

|                       |                                                                                   |
|-----------------------|-----------------------------------------------------------------------------------|
| Target<br>1s.jj. 1. B | KNLQKFLEGTSSIAGVLVDATKERLSVYQAMKKGIIRPGTAFELLEQAATGYVIDPIKGLKLTVEEAVRMGIVGPEFKD   |
| Target<br>1s.jj. 1. B | KLLSAERAVTGYKDPYSGKLISLFQAMKKGLILKDHGIRLLEAQIATGGIIDPEESHRLPVDVAYQRGLFDEEMNEILTD  |
| Target<br>1s.jj. 1. B | PSDDTKGFFDPNTEENLTYQLMERCVTDPQTGLRLLPLKEKKRERKTSSKSSVRKRRVVIVDPETGKEMSVYEAYRKGL   |
| Target<br>1s.jj. 1. B | IDHQTYLELSECEWEIEITISSSDGVVKSMIIDRRSGRQYDIDEAIAKSLIDRSALDQYRAGTSLSITEFADMLSGNAGG  |
| Target<br>1s.jj. 1. B | FRSRSSSVGSSSYPIPAVSRTQLASWSDPTEETGPVAGILDTETLEKVSITEAMHRNLVDNITGQRLLEAQAQTGGII    |
| Target<br>1s.jj. 1. B | DPNTGERFPVTDVANKGLVDKIMVDRINLAQKAFCGFEDPRTKTKMSAAQALKKGWLYYEAGQRFLEVQYL TGGLIEPDT |
| Target<br>1s.jj. 1. B | PGRVPLDEALQRGTVDARTAQKL RDVSAYS KYLTCPKTKLKISYKDALDRSMVEEGTGLRLLEAAAQSSKGYSPYSVSG |
| Target<br>1s.jj. 1. B | SGSTTGSRSRGTGSRAGSRRGSFDTATSGFSMTFSSSSYSSSGYGRRYASGPTSSLGGPESAAA                  |

## Materials and Methods

### Template Search

Template search with has been performed against the SWISS-MODEL template library (SMTL, last update: 2023-11-08, last included PDB release: 2023-11-03).

### Template Selection

For each identified template, the template's quality has been predicted from features of the target-template alignment. The templates with the highest quality have then been selected for model building.

### Model Building

Models are built based on the target-template alignment using ProMod3 (Studer et al.). Coordinates which are conserved between the target and the template are copied from the template to the model. Insertions and deletions are remodelled using a fragment library. Side chains are then rebuilt. Finally, the geometry of the resulting model is regularized by using a force field.

### Model Quality Estimation

The global and per-residue model quality has been assessed using the QMEAN scoring function (Studer et al.).

### Ligand Modelling

Ligands present in the template structure are transferred by homology to the model when the following criteria are met: (a) The ligands are annotated as biologically relevant in the template library, (b) the ligand is in contact with the model, (c) the ligand is not clashing with the protein, (d) the residues in contact with the ligand are conserved between the target and the template. If any of these four criteria is not satisfied, a certain ligand will not be included in the model. The model summary includes information on why and which ligand has not been included.

### Oligomeric State Conservation

The quaternary structure annotation of the template is used to model the target sequence in its oligomeric form. The method (Bertoni et al.) is based on a supervised machine learning algorithm, Support Vector Machines (SVM), which combines interface conservation, structural clustering, and other template features to provide a quaternary structure quality estimate (QSQE). The QSQE score is a number between 0 and 1, reflecting the expected accuracy of the interchain contacts for a model built based a given alignment and template. Higher numbers indicate higher reliability. This complements the GMQE score which estimates the accuracy of the tertiary structure of the resulting model.

## References

- **BLAST**  
Camacho, C., Coulouris, G., Avagyan, V., Ma, N., Papadopoulos, J., Bealer, K., Madden, T.L. BLAST+: architecture and applications. BMC Bioinformatics 10, 421-430 (2009).  [doi>](https://doi.org/10.1186/1471-2108-10-421)

- **HHblits**

Steinegger, M., Meier, M., Mirdita, M., Vöhringer, H., Haunsberger, S. J., Söding, J. HH-suite3 for fast remote homology detection and deep protein annotation. *BMC Bioinformatics* 20, 473 (2019).  [doi.org/10.1186/s12922-019-0561-1](https://doi.org/10.1186/s12922-019-0561-1)

### Table T1:

Primary amino acid sequence for which templates were searched and models were built.

[illegible]

### Table T2:

| Template   | Seq Identity | Oligo-state | QSQE | Found by    | Method       | Resolution | Seq Similarity | Coverage | Description         |
|------------|--------------|-------------|------|-------------|--------------|------------|----------------|----------|---------------------|
| H9F0F3.1.A | 94.23        | monomer     | -    | AFDB search | AlphaFold v2 | NA         | 0.59           | 0.26     | Plectin isoform 1c  |
| 5dzz.1.A   | 45.12        | monomer     | -    | BLAST       | X-ray        | 2.60Å      | 0.40           | 0.10     | Desmoplakin         |
| 8iah.1.2   | 38.97        | monomer     | -    | BLAST       | EM           | NA         | 0.38           | 0.12     | Spectrin beta chain |
| 8iah.1.3   | 38.97        | monomer     | -    | BLAST       | EM           | NA         | 0.38           | 0.12     | Spectrin beta chain |
| 5dzz.1.A   | 54.12        | monomer     | -    | HHblits     | X-ray        | 2.60Å      | 0.45           | 0.11     | Desmoplakin         |
| 5dzz.1.A   | 51.14        | monomer     | -    | HHblits     | X-ray        | 2.60Å      | 0.45           | 0.11     | Desmoplakin         |
| 1sjj.1.A   | 12.54        | homo-dimer  | -    | HHblits     | 2DX          | NA         | 0.27           | 0.13     | actinin             |
| 1sjj.1.B   | 12.54        | homo-dimer  | -    | HHblits     | 2DX          | NA         | 0.27           | 0.13     | actinin             |
| 5dzz.1.A   | 51.48        | monomer     | -    | BLAST       | X-ray        | 2.60Å      | 0.45           | 0.10     | Desmoplakin         |
| 5dzz.1.A   | 47.12        | monomer     | -    | HHblits     | X-ray        | 2.60Å      | 0.42           | 0.11     | Desmoplakin         |
| 5dzz.1.A   | 48.75        | monomer     | -    | BLAST       | X-ray        | 2.60Å      | 0.43           | 0.11     | Desmoplakin         |
| 5dzz.1.A   | 38.07        | monomer     | -    | HHblits     | X-ray        | 2.60Å      | 0.38           | 0.11     | Desmoplakin         |
| 5j1i.1.A   | 96.47        | monomer     | -    | HHblits     | X-ray        | 2.80Å      | 0.59           | 0.08     | Plectin             |

| Template | Seq Identity | Oligo-state | QSQE | Found by | Method | Resolution | Seq Similarity | Coverage | Description                                                |
|----------|--------------|-------------|------|----------|--------|------------|----------------|----------|------------------------------------------------------------|
| 8iah.1.1 | 38.97        | monomer     | -    | BLAST    | EM     | NA         | 0.38           | 0.12     | Spectrin beta chain                                        |
| 5ji1.1.A | 96.37        | monomer     | -    | BLAST    | X-ray  | 2.80Å      | 0.59           | 0.08     | Plectin                                                    |
| 4z6g.1.A | 66.86        | monomer     | -    | HHblits  | X-ray  | 2.65Å      | 0.51           | 0.08     | Microtubule-actin cross-linking factor 1, isoforms 1/2/3/5 |
| 6sl7.1.A | 27.80        | homo-dimer  | -    | HHblits  | X-ray  | 3.30Å      | 0.35           | 0.09     | Calponin homology domain protein putative                  |
| 3f7p.1.A | 96.93        | monomer     | -    | HHblits  | X-ray  | 2.75Å      | 0.60           | 0.06     | Plectin-1                                                  |
| 7ank.1.A | 12.69        | monomer     | -    | HHblits  | X-ray  | 3.20Å      | 0.27           | 0.10     | Alpha-actinin-2                                            |
| 1hci.1.A | 14.35        | homo-dimer  | -    | HHblits  | X-ray  | 2.80Å      | 0.28           | 0.09     | ALPHA-ACTININ 2                                            |
| 7a8u.1.A | 14.35        | homo-dimer  | -    | HHblits  | X-ray  | 3.80Å      | 0.28           | 0.09     | Alpha-actinin-2                                            |
| 7a8t.1.A | 14.35        | homo-dimer  | -    | HHblits  | X-ray  | 2.69Å      | 0.28           | 0.09     | Alpha-actinin-2                                            |
| 6sl2.1.A | 29.82        | homo-dimer  | -    | HHblits  | X-ray  | 3.10Å      | 0.36           | 0.08     | Calponin homology domain protein putative                  |
| 6sl3.1.A | 29.82        | homo-dimer  | -    | HHblits  | X-ray  | 3.10Å      | 0.36           | 0.08     | Calponin homology domain protein putative                  |
| 4d1e.1.A | 12.65        | homo-dimer  | -    | HHblits  | X-ray  | 3.50Å      | 0.26           | 0.09     | ALPHA-ACTININ-2                                            |
| 3pe0.1.A | 88.53        | monomer     | -    | HHblits  | X-ray  | 2.95Å      | 0.58           | 0.06     | Plectin                                                    |
| 8iah.1.Z | 15.20        | monomer     | -    | HHblits  | EM     | NA         | 0.28           | 0.22     | Spectrin beta chain                                        |
| 8iah.1.Y | 23.78        | monomer     | -    | HHblits  | EM     | NA         | 0.32           | 0.25     | Spectrin beta chain                                        |
| 8iah.1.X | 23.78        | monomer     | -    | HHblits  | EM     | NA         | 0.32           | 0.25     | Spectrin beta chain                                        |
| 8iah.1.W | 23.78        | monomer     | -    | HHblits  | EM     | NA         | 0.32           | 0.25     | Spectrin beta chain                                        |
| 8iah.1.Z | 23.78        | monomer     | -    | HHblits  | EM     | NA         | 0.32           | 0.25     | Spectrin beta chain                                        |
| 8iah.1.0 | 23.78        | monomer     | -    | HHblits  | EM     | NA         | 0.32           | 0.25     | Spectrin beta chain                                        |
| 8iah.1.1 | 23.78        | monomer     | -    | HHblits  | EM     | NA         | 0.32           | 0.25     | Spectrin beta chain                                        |
| 8iah.1.2 | 23.78        | monomer     | -    | HHblits  | EM     | NA         | 0.32           | 0.25     | Spectrin beta chain                                        |
| 8iah.1.3 | 23.78        | monomer     | -    | HHblits  | EM     | NA         | 0.32           | 0.25     | Spectrin beta chain                                        |
| 8iah.1.Y | 15.20        | monomer     | -    | HHblits  | EM     | NA         | 0.28           | 0.22     | Spectrin beta chain                                        |
| 8iah.1.X | 15.20        | monomer     | -    | HHblits  | EM     | NA         | 0.28           | 0.22     | Spectrin beta chain                                        |
| 8iah.1.W | 15.20        | monomer     | -    | HHblits  | EM     | NA         | 0.28           | 0.22     | Spectrin beta chain                                        |
| 8iah.1.0 | 38.97        | monomer     | -    | BLAST    | EM     | NA         | 0.38           | 0.12     | Spectrin beta chain                                        |
| 8iah.1.0 | 15.20        | monomer     | -    | HHblits  | EM     | NA         | 0.28           | 0.22     | Spectrin beta chain                                        |
| 8iah.1.1 | 15.20        | monomer     | -    | HHblits  | EM     | NA         | 0.28           | 0.22     | Spectrin beta chain                                        |
| 8iah.1.2 | 15.20        | monomer     | -    | HHblits  | EM     | NA         | 0.28           | 0.22     | Spectrin beta chain                                        |
| 8iah.1.3 | 15.20        | monomer     | -    | HHblits  | EM     | NA         | 0.28           | 0.22     | Spectrin beta chain                                        |
| 4d1e.1.A | 25.11        | homo-dimer  | -    | HHblits  | X-ray  | 3.50Å      | 0.33           | 0.15     | ALPHA-ACTININ-2                                            |
| 1sjj.1.A | 26.16        | homo-dimer  | -    | HHblits  | 2DX    | NA         | 0.33           | 0.15     | actinin                                                    |
| 1sjj.1.B | 26.16        | homo-dimer  | -    | HHblits  | 2DX    | NA         | 0.33           | 0.15     | actinin                                                    |
| 8iah.1.Y | 38.97        | monomer     | -    | BLAST    | EM     | NA         | 0.38           | 0.12     | Spectrin beta chain                                        |
| 8iah.1.X | 38.97        | monomer     | -    | BLAST    | EM     | NA         | 0.38           | 0.12     | Spectrin beta chain                                        |
| 8iah.1.W | 38.97        | monomer     | -    | BLAST    | EM     | NA         | 0.38           | 0.12     | Spectrin beta chain                                        |
| 8iah.1.Z | 38.97        | monomer     | -    | BLAST    | EM     | NA         | 0.38           | 0.12     | Spectrin beta chain                                        |

The table above shows the top 50 filtered templates. A further 1,277 templates were found which were considered to be less suitable for modelling than the filtered list.

1aa2.1.A, 1aj3.1.A, 1aoa.1.A, 1aww.1.A, 1awx.1.A, 1b07.1.A, 1bhd.1.A, 1bhd.2.A, 1bkr.1.A, 1c1g.1.A, 1c1g.1.B, 1c1g.2.A, 1c1g.2.B, 1csk.1.A, 1csk.2.A, 1cun.1.A, 1cun.1.B, 1d7m.1.A, 1d7m.1.B, 1dxx.1.A, 1fmk.1.A, 1g83.1.A, 1g83.2.A, 1g8x.1.A, 1g8x.1.B, 1gl5.1.A, 1gri.1.A, 1gri.1.B, 1h67.1.A, 1hci.1.A, 1k9a.1.A, 1k9a.2.A, 1k9a.3.A, 1k9a.5.A, 1k9a.6.A, 1ksw.1.A, 1lck.1.A, 1lm5.1.A, 1lm5.1.B, 1lm7.1.A, 1m3a.1.A, 1m3b.1.A, 1mb8.1.A, 1mv3.1.A, 1ng2.1.A, 1opk.1.A, 1opl.1.A, 1owa.1.A, 1p2x.1.A, 1p5s.1.A, 1pa7.1.A, 1pxy.1.A, 1pxy.2.A, 1qag.1.A, 1qag.2.A, 1qcf.1.A, 1qly.1.A, 1quu.1.A, 1rt8.1.A, 1s1n.1.A, 1s35.1.A, 1sh5.1.A, 1sh5.1.B, 1sh6.1.A, 1sjj.1.A, 1sjj.1.B, 1tjt.1.A, 1u4q.1.A, 1u4q.2.A, 1u5p.1.A, 1uec.1.A, 1ueg.1.A, 1ujo.1.A, 1v5k.1.A, 1vka.1.A, 1wfw.1.A, 1wjo.1.A, 1wku.1.A, 1wix.1.A, 1wxt.1.A, 1wyl.1.A, 1wym.1.A, 1wyn.1.A, 1woy.1.A, 1wyp.1.A, 1wyq.1.A, 1wyr.1.A, 1x6g.1.A, 1x79.1.B, 1x79.1.C, 1y57.1.A, 1ywo.1.A, 1ywp.1.A, 2abl.1.A, 2b9c.1.A, 2b9c.1.B,



2coi.1.A, 2co0i.1.A, 2co0o.2.A, 2c0ut.2.A, 2d3e.1.A, 2d3e.1.B, 2d85.1.A, 2d86.1.A, 2d87.1.A, 2d88.1.A, 2d89.1.A, 2dfs.1.A, 2dfs.1.H, 2dk9.1.A, 2dx1.1.A, 2dyb.1.A, 2dyb.2.A, 2e7s.1.A, 2e7s.1.B, 2e7s.10.A, 2e7s.10.B, 2e7s.2.A, 2e7s.2.B, 2e7s.3.A, 2e7s.3.B, 2e7s.4.A, 2e7s.4.B, 2e7s.5.A, 2e7s.5.B, 2e7s.6.A, 2e7s.6.B, 2e7s.7.A, 2e7s.7.B, 2e7s.8.A, 2e7s.8.B, 2e7s.9.A, 2e7s.9.B, 2e9k.1.A, 2ee7.1.A, 2efr.1.A, 2efr.1.B, 2efs.1.A, 2efs.1.B, 2egc.1.A, 2ege.1.A, 2elb.1.A, 2epd.1.A, 2eqb.1.B, 2eqb.1.C, 2eyi.1.A, 2eyn.1.A, 2eyw.1.A, 2eyz.1.A, 2fo0.1.A, 2fxm.1.A, 2fxm.1.B, 2fxo.1.A, 2fxo.1.B, 2fxo.2.A, 2fxo.2.B, 2h8h.1.A, 2i1j.1.A, 2i1k.1.A, 2iak.1.A, 2j6k.1.A, 2j7i.1.A, 2jv9.1.A, 2k2r.1.A, 2k3s.1.A, 2k79.1.A, 2k7a.1.A, 2kr3.1.A, 2kym.1.A, 2l3g.1.A, 2l3s.1.A, 2lmj.1.A, 2lqn.1.A, 2lqw.1.A, 2lx7.1.A, 2n03.1.A, 2ocy.1.A, 2ocy.1.B, 2odu.1.A, 2odv.1.A, 2oto.1.A, 2oto.1.B, 2oto.2.A, 2oto.2.B, 2ptk.1.A, 2pz1.1.A, 2q13.1.A, 2qjz.1.A, 2qjz.2.A, 2r0o.1.A, 2r0o.2.A, 2r8u.1.A, 2rn8.1.A, 2rna.1.A, 2rqr.1.A, 2rqv.1.A, 2rqw.1.A, 2rr8.1.A, 2spc.1.A, 2spc.1.B, 2src.1.A, 2v66.1.A, 2v66.1.B, 2v66.1.C, 2v66.1.D, 2v71.1.A, 2v71.1.B, 2vzc.1.A, 2vzd.1.A, 2vzd.2.A, 2vzg.1.B, 2w4u.1.K, 2w4u.1.L, 2w4u.1.M, 2wa5.1.A, 2wa6.1.A, 2wa7.1.A, 2wfn.1.A, 2y3a.1.B, 2yrn.1.A, 2z0o.1.A, 3a98.1.A, 3a98.2.A, 3byh.1.B, 3co1.1.A, 3dtp.1.A, 3dtp.1.B, 3edu.1.A, 3edv.1.A, 3edv.1.B, 3f31.1.A, 3f31.1.B, 3f57.1.A, 3f7p.1.A, 3fb2.1.A, 3fb2.2.A, 3fer.1.A, 3fer.2.A, 3fer.4.A, 3hoc.1.A, 3hop.1.A, 3l6x.1.A, 3jak.1.C, 3jax.1.A, 3jax.1.B, 3jbh.1.A, 3jbh.1.B, 3jv3.1.A, 3kbt.1.A, 3kbt.2.A, 3kbu.1.A, 3kbu.2.A, 3ky9.1.A, 3l3x.1.A, 3l3x.1.B, 3lue.1.K, 3nhn.1.A, 3o0z.1.A, 3o0z.1.B, 3o0z.2.A, 3o0z.2.B, 3oja.1.B, 3pdy.1.A, 3pdy.2.A, 3pe0.1.A, 3plt.1.A, 3plt.1.B, 3plt.2.A, 3r6n.1.A, 3r6n.2.A, 3s84.1.A, 3s84.1.B, 3tnu.1.B, 3u1c.1.A, 3u1c.2.A, 3u59.1.A, 3u59.1.B, 3u59.2.A, 3u59.3.A, 3uf4.1.A, 3uul.1.A, 3uum.1.A, 3uum.2.A, 3uun.1.A, 3uun.2.A, 3vkg.1.A, 3vkg.1.B, 3vkh.1.A, 3vkh.2.A, 3vry.2.A, 3vs3.2.A, 3vs7.1.A, 3vs7.2.A, 3wuq.1.A, 4a7f.1.B, 4a7f.1.H, 4b7l.1.A, 4b7l.2.A, 4d1e.1.A, 4d8k.1.A, 4edl.1.A, 4edl.2.A, 4edl.3.A, 4edl.4.A, 4edl.5.A, 4edm.1.A, 4edm.2.A, 4edn.1.A, 4edn.2.A, 4edn.5.A, 4gkw.1.A, 4gkw.1.B, 4h5y.1.A, 4h8s.1.A, 4h8s.1.B, 4h8s.2.A, 4h8s.2.B, 4hpg.1.C, 4jio.1.A, 4jio.2.A, 4l3i.1.A, 4l3i.1.B, 4l6y.1.A, 4l6y.1.B, 4lin.1.A, 4lin.1.B, 4lin.1.C, 4lin.2.A, 4lin.2.B, 4lin.2.C, 4lin.3.A, 4lin.3.B, 4lin.3.C, 4lin.4.A, 4lin.4.B, 4lin.4.C, 4l18.1.B, 4l18.1.C, 4mh6.1.A, 4mt6.1.A, 4p1w.1.C, 4p1w.1.F, 4pd3.1.A, 4pd3.2.A, 4q28.1.A, 4q57.1.B, 4q58.1.A, 4q58.2.A, 4q59.1.A, 4q59.2.A, 4qmd.1.A, 4qmd.2.A, 4rfx.1.A, 4rfx.1.B, 4rfx.2.A, 4rfx.2.B, 4rfx.3.A, 4rh7.1.A, 4rm8.1.A, 4rm8.2.A, 4tql.1.A, 4txi.1.A, 4txk.1.A, 4u5w.1.B, 4u5w.1.D, 4uer.1.a, 4uxv.1.A, 4xa1.1.A, 4xa1.1.B, 4xa1.2.A, 4xa1.2.B, 4xa3.1.A, 4xa3.1.B, 4xa6.1.A, 4xa6.1.B, 4xa6.2.A, 4xa6.2.B, 4xi2.1.A, 4zdg.1.A, 4zdw.1.B, 4zdw.1.C, 4zry.1.A, 5a36.1.A, 5a37.1.A, 5a38.1.A, 5a4b.1.A, 5a5t.1.A, 5ayh.1.A, 5bvr.1.A, 5c5b.1.B, 5cj0.1.A, 5cj0.1.B, 5cj1.1.A, 5cj1.1.B, 5cj1.2.A, 5cj1.2.B, 5cj1.3.A, 5cj1.3.B, 5cj1.4.A, 5cj1.4.B, 5dzz.1.A, 5gox.1.A, 5gox.1.B, 5h0g.1.A, 5i4e.1.A, 5ih2.1.A, 5ih2.2.A, 5ijn.1.F, 5ijn.1.G, 5ijn.1.H, 5ijn.1.L, 5ijn.1.R, 5j1f.1.A, 5j1f.2.A, 5j1g.1.A, 5j1h.1.A, 5j1h.2.A, 5j1i.1.A, 5j4o.1.A, 5jhf.1.C, 5jhf.3.C, 5l0o.1.A, 5l23.1.A, 5m6s.1.A, 5mo4.1.A, 5nl6.1.A, 5nl6.1.B, 5nl7.1.A, 5nl7.2.A, 5nug.1.A, 5tby.1.A, 5tby.1.B, 5to5.1.A, 5to5.1.B, 5to6.1.A, 5to6.1.B, 5to6.1.C, 5to6.1.D, 5to7.1.A, 5to7.1.B, 5to7.1.C, 5to7.1.D, 5tvb.1.A, 5tvb.1.B, 5ul6.1.A, 5wjb.1.A, 5wjb.1.B, 5wlq.1.A, 5wlz.1.A, 5wlz.1.B, 5wlz.1.C, 5wlz.1.D, 5xg2.1.A, 6amv.1.A, 6amw.1.A, 6anu.1.G, 6atv.1.A, 6b25.1.A, 6b26.1.A, 6b27.1.A, 6b27.2.A, 6b27.5.A, 6b28.1.A, 6d8c.1.A, 6djl.1.B, 6djl.2.A, 6djl.3.A, 6djl.4.A, 6ek8.1.A, 6el1.1.T, 6f1t.1.U, 6f1t.1.h, 6f3f.1.A, 6fec.1.A, 6fsa.1.A, 6fyy.1.g, 6gao.1.A, 6gao.1.B, 6gao.1.C, 6gap.1.A, 6gap.1.B, 6gap.1.C, 6gy6.1.B, 6gy7.1.A, 6gy7.2.A, 6gy7.3.A, 6gy7.4.A, 6h2x.1.A, 6ian.1.A, 6ian.1.B, 6ian.2.A, 6ian.2.B, 6ici.1.A, 6ign.1.A, 6ixv.1.A, 6ixv.2.A, 6ixv.3.A, 6ixv.4.A, 6jlb.1.A, 6jlb.1.B, 6jlb.1.C, 6jlb.1.D, 6kn7.1.P, 6kn7.1.Q, 6kn8.1.P, 6kn8.1.Q, 6l5h.1.A, 6l5h.1.B, 6l5j.1.A, 6l5j.1.B, 6l5j.2.A, 6l5j.2.B, 6m3p.1.B, 6m3q.1.B, 6m3r.1.B, 6m5g.1.F, 6mi3.1.A, 6mi3.1.B, 6mi4.1.A, 6mi4.1.B, 6mib.1.B, 6nf1.1.A, 6o31.1.A, 6oa6.1.A, 6pf2.1.A, 6pf2.1.B, 6pfp.1.A, 6pfp.1.B, 6pfp.2.A, 6pfp.2.B, 6rlb.1.A, 6rlb.1.B, 6sc2.1.A, 6sc2.1.B, 6sdf.1.A, 6sdf.2.A, 6sl2.1.A, 6sl3.1.A, 6sl7.1.A, 6snz.1.A, 6snz.1.B, 6snz.2.A, 6snz.2.B, 6swt.1.A, 6u42.439.A, 6u42.440.A, 6u42.441.A, 6u42.442.A, 6up6.1.A, 6upn.1.A, 6uui.1.B, 6uy7.1.A, 6uy8.1.A, 6uy8.2.A, 6uy9.1.A, 6vec.1.L, 6vzf.1.A, 6w2s.1.9, 6w2t.1.d, 6wg3.1.A, 6x5z.1.B, 6x5z.1.D, 6xe9.1.A, 6xe9.1.D, 6xf1.1.A, 6xf1.2.A, 6xf2.1.A, 6xf2.2.A, 6yam.1.g, 6ybd.1.C, 6yjd.1.A, 6yrl.1.A, 6yrl.1.B, 6yrl.1.C, 6yrl.1.D, 6yrn.1.A, 6yrn.1.B, 6yrn.1.C, 6yrn.1.D, 6yrn.2.A, 6yrn.2.B, 6yrn.2.C, 6yrn.2.D, 6ys4.1.A, 6ys4.2.A, 6ys4.2.B, 6ys4.2.C, 6ys4.3.A, 6ys4.3.B, 6ysy.1.A, 6yuf.1.C, 6yvud.1.C, 6yvu.1.A, 6yvv.1.A, 6

8glv.603.A, 8glv.756.A, 8glv.844.A, 8glv.854.A, 8glv.855.A, 8glv.856.A, 8glv.891.A, 8glv.892.A, 8glv.902.A, 8glv.913.A, 8glv.951.A, 8glv.952.A, 8glv.953.A, 8glv.959.A, 8glv.960.A, 8glv.962.A, 8glv.963.A, 8glv.966.A, 8glv.974.A, 8gmb.1.A, 8i7o.1.A, 8i7o.11.A, 8i7o.18.A, 8i7o.19.A, 8i7o.20.A, 8i7o.27.A, 8i7o.28.A, 8i7o.31.A, 8i7o.47.A, 8i7o.48.A, 8i7o.49.A, 8i7o.56.A, 8i7o.57.A, 8i7o.59.A, 8i7o.91.A, 8i7o.92.A, 8i7r.107.A, 8i7r.108.A, 8i7r.109.A, 8i7r.110.A, 8i7r.111.A, 8i7r.112.A, 8i7r.113.A, 8i7r.114.A, 8i7r.115.A, 8i7r.128.A, 8i7r.130.A, 8i7r.132.A, 8i7r.133.A, 8i7r.134.A, 8i7r.135.A, 8i7r.136.A, 8i7r.137.A, 8i7r.138.A, 8i7r.139.A, 8i7r.140.A, 8i7r.19.A, 8i7r.2.A, 8i7r.20.A, 8i7r.21.A, 8i7r.213.A, 8i7r.214.A, 8i7r.215.A, 8i7r.216.A, 8i7r.22.A, 8i7r.24.A, 8i7r.25.A, 8i7r.26.A, 8i7r.27.A, 8i7r.398.A, 8i7r.4.A, 8i7r.411.A, 8i7r.42.A, 8i7r.43.A, 8i7r.44.A, 8i7r.45.A, 8i7r.46.A, 8i7r.47.A, 8i7r.48.A, 8i7r.49.A, 8i7r.5.A, 8i7r.62.A, 8i7r.63.A, 8i7r.64.A, 8i7r.65.A, 8i7r.69.A, 8i7r.70.A, 8i7r.71.A, 8i7r.73.A, 8i7r.74.A, 8i7r.75.A, 8iah.1.2, 8iah.1.4, 8iah.1.5, 8iah.1.6, 8iah.1.7, 8iai.1.1, 8iai.1.2, 8iai.1.T, 8iai.1.U, 8iai.1.W, 8iai.1.X, 8iyj.11.A, 8iyj.12.A, 8iyj.13.A, 8iyj.14.A, 8iyj.15.A, 8iyj.16.A, 8iyj.35.A, 8iyj.357.A, 8iyj.358.A, 8iyj.359.A, 8iyj.36.A, 8iyj.360.A, 8iyj.361.A, 8iyj.37.A, 8iyj.378.A, 8iyj.379.A, 8iyj.38.A, 8iyj.380.A, 8iyj.381.A, 8iyj.382.A, 8iyj.383.A, 8iyj.384.A, 8iyj.385.A, 8iyj.386.A, 8iyj.387.A, 8iyj.39.A, 8iyj.404.A, 8iyj.405.A, 8iyj.406.A, 8iyj.407.A, 8iyj.408.A, 8iyj.424.A, 8iyj.425.A, 8iyj.426.A, 8iyj.427.A, 8iyj.428.A, 8iyj.429.A, 8iyj.430.A, 8iyj.431.A, 8iyj.432.A, 8iyj.433.A, 8iyj.450.A, 8iyj.451.A, 8iyj.452.A, 8iyj.453.A, 8iyj.454.A, 8iyj.455.A, 8iyj.456.A, 8iyj.457.A, 8iyj.458.A, 8iyj.459.A, 8iyj.476.A, 8iyj.477.A, 8iyj.478.A, 8iyj.479.A, 8iyj.480.A, 8iyj.481.A, 8iyj.543.A, 8iyj.544.A, 8iyj.545.A, 8iyj.546.A, 8iyj.547.A, 8iyj.548.A, 8iyj.549.A, 8iyj.56.A, 8iyj.57.A, 8iyj.58.A, 8iyj.59.A, 8iyj.60.A, 8iyj.61.A, 8iyj.81.A, 8iyj.82.A, 8iyj.83.A, 8iyj.84.A, 8j07.1.A, 8j07.149.A, 8j07.152.A, 8j07.153.A, 8j07.156.A, 8j07.163.A, 8j07.2.A, 8j07.3.A, 8j07.31.A, 8j07.78.A, 8j07.844.A, 8j07.848.A, 8j07.849.A, 8j07.851.A, 8j07.852.A, 8j07.853.A, 8j07.854.A, 8j07.856.A, 8j07.857.A, 8j07.859.A, 8j07.860.A, 8j07.861.A, 8j07.862.A, 8j07.863.A, 8j07.864.A, 8j07.866.A, 8j07.867.A, 8j07.868.A, 8j07.869.A, 8j07.876.A, 8j07.877.A, 8j07.894.A, 8j07.896.A, 8j07.899.A, 8j07.908.A, 8j07.915.A, 8j07.916.A, 8j07.935.A, 8j07.937.A, 8j07.954.A, 8j07.956.A, 8j07.963.A, 8j07.965.A, 8p0s.1.A, 8p0s.1.B, 8p4y.1.A, 8ppl.1.L, 8q4g.1.G, 8q4g.1.H, 8q6t.1.A, 8q6t.1.B, 8q6t.1.H, 8q6t.1.N, 8q6t.1.O, 8q6t.1.Q, 8snb.124.A, 8snb.125.A, 8snb.126.A, 8snb.127.A, 8snb.128.A, 8snb.129.A, 8snb.130.A, 8snb.133.A, 8snb.135.A, 8snb.63.A, 8snb.64.A, 8srq.1.H, 8ssn.1.A, 8ssn.2.A, 8tek.1.A, 8tek.1.B, 8tek.1.D, 8tek.1.F, 8tek.1.I, 8th8.1.A, 8th8.1.D, 8th8.1.E, 8th8.1.J, 8th8.1.K, 8th8.1.P, 8th8.1.R, 8tid.1.1, 8tid.1.2, 8tid.1.3, 8tid.1.A, 8tid.1.B, 8tid.1.D, 8tid.1.E, 8tid.1.J, 8tid.1.K, 8tid.1.N, 8tid.1.P, 8tid.1.S, 8tid.1.T, 8tj5.1.U, 8tj5.1.V, 8tj5.1.W, 8tj5.1.Y, 8tj5.1.b, 8tj5.1.c, 8tj5.1.d, 8to0.18.A, 8to0.23.A, 8to0.397.A, 8to0.398.A, 8to0.400.A, 8to0.409.A, 8to0.410.A, 8to0.415.A, 8to0.439.A, 8to0.460.A, 8to0.462.A, 8to0.72.A, 8tvl.1.A, 8u95.1.A, 8u95.1.B
