# Supplementary material for: Effects of Copy Number Variations in the Plectin (PLEC) Gene on the Growth Traits and Meat Quality of Leizhou Black Goats
Source: MDPI journal article supplement (doi:10.3390/ani13233651), 2023-11-25
Supplement: s1 [file s1]

## Supplementary Materials

**Table S1. Primer information.**

| Gene name    |   | 5'-3'                     | Length | Note         |
|--------------|---|---------------------------|--------|--------------|
| <i>PLEC</i>  | F | GCTCAGAACCCTGGAGACAG      | 222    | Exonic-CNV   |
|              | R | TCTCAGCAGGTTGGGGTTTC      |        |              |
|              | F | TGTTCGGACGGCACTTCTTT      | 206    | Intronic-CNV |
|              | R | CCTGTGAGAGACGCCTTGAG      |        |              |
|              | F | GGGGTAGGGGACAGCTTAGA      | 114    | Intronic-CNV |
|              | R | TTAATAGGGCATGGTGCGGC      |        |              |
| <i>MC1R</i>  | F | GGGCAGTCCCTTGACAAAGA      | 129    | CNV-qPCR     |
|              | R | ATCTCCCCAGCCTCCTCATT      |        |              |
| <i>PLEC</i>  | F | CAAAGTTGCACCGCACAGAG      | 232    | mRNA-qPCR    |
|              | R | TGCAAGGCCTGAGTCTCCT       |        |              |
| <i>GADPH</i> | F | TGAAGGTCGGTGTGAACGGATTTGG | 277    | mRNA-qPCR    |
|              | R | ACGACATACTCAGCACCAGCATCAC |        |              |

**Table S2. The association analysis between the traits and CNV-2 in the goat *PLEC* gene.**

| Growth Traits                                                                                      | CNV Types (Mean $\pm$ SE)    |                                |                                         | <i>P</i><br>values |
|----------------------------------------------------------------------------------------------------|------------------------------|--------------------------------|-----------------------------------------|--------------------|
|                                                                                                    | Loss                         | Normal                         | Gain                                    |                    |
|                                                                                                    | (1 Copy)<br>( <i>n</i> = 31) | (2 Copies)<br>( <i>n</i> =245) | ( $\geq$ 3 Copies)<br>( <i>n</i> = 140) |                    |
| body height (BH,cm)                                                                                | 51.74 $\pm$ 0.24             | 52.07 $\pm$ 0.09               | 51.65 $\pm$ 0.10                        | 0.241              |
| body oblique length (BOL, cm)                                                                      | 54.37 $\pm$ 0.25             | 54.76 $\pm$ 0.10               | 55.12 $\pm$ 0.08                        | 0.417              |
| chest circumference(CC, cm)                                                                        | 56.94 $\pm$ 0.35             | 57.88 $\pm$ 0.13               | 58.09 $\pm$ 0.12                        | 0.072              |
| body weight (BW, kg)                                                                               | 18.99 $\pm$ 0.24             | 19.27 $\pm$ 0.09               | 20.31 $\pm$ 0.09                        | 0.061              |
| cannon circumference(CAC, cm)                                                                      | 7.17 $\pm$ 0.05              | 7.19 $\pm$ 0.01                | 7.33 $\pm$ 0.04                         | 0.104              |
| Carcass Traits &<br>Meat Quality                                                                   | Loss                         | Normal                         | Gain                                    |                    |
|                                                                                                    | (1 Copy)                     | (2 Copies)                     | ( $\geq$ 3 Copies)                      |                    |
|                                                                                                    | ( <i>n</i> = 9)              | ( <i>n</i> =42)                | ( <i>n</i> =29)                         |                    |
| Carcass weight (CW, kg)                                                                            | 8.91 <sup>b</sup> $\pm$ 0.24 | 9.52 <sup>b</sup> $\pm$ 0.16   | 10.01 <sup>a</sup> $\pm$ 0.22           | 0.044              |
| cross-section area of <i>longissimus</i><br><i>dorsi lumbois</i> muscle(CALM,<br>cm <sup>2</sup> ) | 7.44 $\pm$ 0.24              | 7.67 $\pm$ 0.06                | 8.14 $\pm$ 0.20                         | 0.058              |
| water loss rate (WLR, %)                                                                           | 4.83 $\pm$ 0.09              | 4.81 $\pm$ 0.18                | 4.87 $\pm$ 0.14                         | 0.366              |
| water holding capacity<br>(WHC, %)                                                                 | 4.80 $\pm$ 0.14              | 4.79 $\pm$ 0.05                | 4.94 $\pm$ 0.06                         | 0.217              |
| shear stress (SS, N)                                                                               | 49.10 <sup>a</sup> $\pm$ 0.6 | 47.98 <sup>b</sup> $\pm$ 0.17  | 46.49 <sup>b</sup> $\pm$ 0.32           | 0.037              |

**Table S3. The association analysis between the traits and CNV-3 in the goat *PLEC* gene.**

| Growth Traits                                                                               | CNV Types (Mean $\pm$ SE)            |                                          |                                                | <i>P</i><br>values |
|---------------------------------------------------------------------------------------------|--------------------------------------|------------------------------------------|------------------------------------------------|--------------------|
|                                                                                             | Loss<br>(1 Copy)<br>( <i>n</i> = 52) | Normal<br>(2 Copies)<br>( <i>n</i> =265) | Gain<br>( $\geq 3$ Copies)<br>( <i>n</i> = 98) |                    |
| body height (BH,cm)                                                                         | 52.03 $\pm$ 0.22                     | 52.19 $\pm$ 0.09                         | 51.77 $\pm$ 0.09                               | 0.437              |
| body oblique length<br>(BOL, cm)                                                            | 54.01 $\pm$ 0.23                     | 54.33 $\pm$ 0.08                         | 55.48 $\pm$ 0.12                               | 0.210              |
| chest circumference(CC,<br>cm)                                                              | 57.32 $\pm$ 0.23                     | 56.77 $\pm$ 0.12                         | 58.17 $\pm$ 0.18                               | 0.357              |
| body weight (BW, kg)                                                                        | 18.64 $\pm$ 0.24                     | 19.72 $\pm$ 0.10                         | 19.59 $\pm$ 0.14                               | 0.175              |
| cannon<br>circumference(CAC, cm)                                                            | 7.14 $\pm$ 0.03                      | 7.21 $\pm$ 0.01                          | 7.23 $\pm$ 0.03                                | 0.218              |
| Carcass Traits & Meat<br>Quality                                                            | Loss<br>(1 copy)<br>( <i>n</i> = 21) | Normal<br>(2 copies)<br>( <i>n</i> =41)  | Gain<br>( $\geq 3$ copies)<br>( <i>n</i> = 18) |                    |
|                                                                                             |                                      |                                          |                                                |                    |
| Carcass weight (CW, kg)                                                                     | 9.12 <sup>b</sup> $\pm$ 0.13         | 9.71 <sup>a</sup> $\pm$ 0.23             | 9.64 <sup>a</sup> $\pm$ 0.43                   | 0.179              |
| cross-section area of<br><i>longissimus dorsi lumbois</i><br>muscle(CALM, cm <sup>2</sup> ) | 7.50 $\pm$ 0.11                      | 7.61 $\pm$ 0.42                          | 8.04 $\pm$ 0.44                                | 0.097              |
| water loss rate (WLR, %)                                                                    | 4.81 $\pm$ 0.08                      | 4.85 $\pm$ 0.07                          | 4.75 $\pm$ 0.22                                | 0.772              |
| water holding capacity<br>(WHC, %)                                                          | 4.93 $\pm$ 0.14                      | 4.81 $\pm$ 0.03                          | 4.86 $\pm$ 0.10                                | 0.391              |
| shear stress (SS, N)                                                                        | 48.81 $\pm$ 0.33                     | 48.09 $\pm$ 0.22                         | 47.79 $\pm$ 0.21                               | 0.064              |
